# Supplementary material for: Noise Genetics: Inferring Protein Function by Correlating Phenotype with Protein Levels and Localization in Individual Human Cells
Source: PLoS Genet. 2014 Mar 6;10(3):e1004176. doi: 10.1371/journal.pgen.1004176 (PMC3945223; doi:10.1371/journal.pgen.1004176)
Supplement: File S1 — Correlation values. Pearson and Spearman correlations values are shown for all the genes in our dataset for all six comparisons. (XLSX) [file pgen.1004176.s012.xlsx]

## Sheet: Sheet1
			prot vel_next	prot angle_change	prot turn_strength	prot persistance	contrast vel_next	contrast angle_change	correlation vel_next	correlation angle_change
			C1	C2	C3	c4	c21	c22	c31	c32
protein name	spearman corr	comp	pearson cor	comp	spearman corr	comp	pearson cor	comp	spearman corr	comp	pearson cor	comp	spearman corr	comp	pearson cor	comp	spearman corr	comp	pearson cor	comp	spearman corr	comp	pearson cor	comp	known genes	known gene also in fovs	comparisons	comp1	comp2	comp3	comp4	comp c21. c22. c31, c32		comp c1 c2 c21 c22 c31 c32
AA282714	0.0475941	c1	0.0261696	c1	-0.0221437	c2	-0.00517097	c2	-0.0943875	c21	-0.036148	c21	-0.0095141	c22	0.0044641	c22	-0.00210246	c32	-0.0366337	c32	-0.0158803	c31	-0.0574548	c31	0	1	0	0	0	0	0	0	0	0
AA928516	-0.0225422	c1	-0.0131192	c1	-0.0429108	c2	-0.0236962	c2	0.0412515	c21	0.0860116	c21	0.0435497	c22	0.0572329	c22	-0.0499415	c32	-0.151962	c32	-0.0961887	c31	-0.194236	c31	0	1	0	0	0	0	0	0	0	0
ACAD11	0.0381623	c1	-0.000431883	c1	-0.069196	c2	-0.0376821	c2	-0.0812237	c21	-0.0276303	c21	0.0362569	c22	0.0513887	c22	-0.0511921	c32	-0.088905	c32	0.112	c31	-0.039852	c31	0	0	0	0	0	0	0		0	0
ACOT7	0.0812619	c1	0.0340238	c1	0.0132187	c2	0.0195277	c2	-0.0346764	c21	-0.044137	c21	-0.0305221	c22	-0.00988868	c22	0.0342173	c32	-0.0135266	c32	-0.0830079	c31	-0.123611	c31	0	1	0	0	0	0	0	0	0	0
actn4	0.0145666	c1	0.00474151	c1	-0.0165496	c2	0.0062957	c2	-0.0650198	c21	-0.0506067	c21	-0.0624847	c22	-0.00708876	c22	0.0547652	c32	-0.00656575	c32	-0.063736	c31	-0.00248281	c31	0	1	0	0	0	0	0	0	0	0
ACTR1A	-0.091311	c1	-0.0715717	c1	0.0194606	c2	0.0288117	c2	-0.00577504	c21	-0.0315141	c21	-0.0806752	c22	-0.0642099	c22	0.0551002	c32	0.041747	c32	-0.167223	c31	-0.158155	c31	0	1	0	0	0	-31	0	1	1	1	.0.0.0.-31.0
ACTR2	-0.134075	c1	-0.203949	c1	-0.103679	c2	-0.108092	c2	-0.0935373	c21	-0.0487447	c21	0.0974373	c22	0.0920818	c22	-0.168825	c32	-0.195435	c32	-0.0966387	c31	-0.206218	c31	0	1	0	0	0	0	-32	1	0	1	.0.0.0.0.-32
ACYP2	-0.00542492	c1	-0.0301044	c1	0.0266382	c2	0.0514353	c2	-0.0848637	c21	-0.0880749	c21	-0.00617359	c22	0.00713482	c22	0.0387672	c32	-0.000501069	c32	-0.0506632	c31	-0.0698329	c31	0	1	0	0	0	0	0	0	0	0
ADK	0.0565548	c1	-0.00584379	c1	-0.0384126	c2	-0.0122521	c2	-0.198489	c21	-0.165291	c21	-0.0760559	c22	-0.0571606	c22	0.000777089	c32	-0.0126007	c32	0.0896065	c31	0.0233382	c31	0	0	0	-21	0	0	0		1	0
ADK	-0.0903759	c1	-0.0845156	c1	0.0145801	c2	0.0288444	c2	0.0458791	c21	0.0813397	c21	-0.0486863	c22	-0.0267532	c22	0.0410847	c32	0.00876718	c32	-0.104167	c31	-0.0930212	c31	0	0	0	0	0	0	0		0	0
AF086125	0.214016	c1	0.122181	c1	-0.0994152	c2	-0.115161	c2	0.0377547	c21	-0.0510199	c21	-0.0739843	c22	-0.0828653	c22	0.0054247	c32	-0.068978	c32	0.0789507	c31	0.0995986	c31	0	1	0	0	0	0	0	0	0	0
AF087973	0.138374	c1	0.0300852	c1	-0.093905	c2	-0.0769828	c2	0.0478084	c21	-0.0158979	c21	-0.265984	c22	-0.244144	c22	0.0765215	c32	0.0408829	c32	0.0701665	c31	0.094671	c31	0	1	0	0	-22	0	0	1	0	1	.0.0.-22.0.0
AI001881	-0.0574668	c1	-0.0503143	c1	0.0433275	c2	0.0734908	c2	-0.036143	c21	-0.0647222	c21	-0.0164661	c22	-0.0148297	c22	0.0177435	c32	0.0179315	c32	0.0224827	c31	-0.0129794	c31	0	1	0	0	0	0	0	0	0	0
AI027434	0.116454	c1	0.043795	c1	-0.0715987	c2	-0.0650179	c2	-0.0911197	c21	-0.03739	c21	0.0455613	c22	0.0848137	c22	-0.0737715	c32	-0.128895	c32	0.0635768	c31	-0.0548826	c31	0	0	0	0	0	0	0		0	0
AI083959	0.0015781	c1	0.00152215	c1	-0.0163767	c2	-0.0167208	c2	0.0550965	c21	0.0194152	c21	-0.0392947	c22	0.0176242	c22	0.0117475	c32	-0.0373878	c32	-0.0967405	c31	-0.0414294	c31	0	0	0	0	0	0	0		0	0
AI208228	-0.0620288	c1	-0.00714179	c1	0.0233641	c2	0.0335955	c2	0.0819259	c21	0.0825761	c21	-0.149183	c22	-0.132314	c22	0.131069	c32	0.0787403	c32	-0.265829	c31	-0.254768	c31	0	1	0	0	0	-31	0	1	1	1	.0.0.0.-31.0
AI214364	-0.0515598	c1	-0.0283375	c1	0.0488216	c2	0.0386842	c2	-0.110385	c21	-0.0589312	c21	0.0181936	c22	0.0264607	c22	0.0422596	c32	0.000515036	c32	-0.0124901	c31	-0.0561889	c31	0	0	0	0	0	0	0		0	0
AI217733	-0.0726981	c1	-0.0844566	c1	0.0332521	c2	0.0387287	c2	-0.161975	c21	-0.119176	c21	-0.0199279	c22	-0.0207071	c22	0.0152822	c32	-0.0495562	c32	0.0382728	c31	-0.083087	c31	0	1	0	0	0	0	0	0	0	0
AI342698	0.196603	c1	0.130327	c1	-0.0924576	c2	-0.0726736	c2	-0.0801886	c21	-0.0276325	c21	0.0269703	c22	0.0256128	c22	-0.0576856	c32	-0.0950647	c32	0.0811786	c31	-0.0101257	c31	0	1	0	0	0	0	0	0	0	0
AI434862	-0.0384889	c1	-0.0498075	c1	0.024412	c2	0.0231724	c2	0.149925	c21	0.0906239	c21	-0.0717957	c22	-0.0737937	c22	0.0379327	c32	0.0198304	c32	-0.0918023	c31	-0.115069	c31	0	1	0	0	0	0	0	0	0	0
AI671392	0.0720325	c1	0.0326714	c1	-0.0319893	c2	-0.0302932	c2	-0.0346057	c21	-0.00204019	c21	0.0671663	c22	0.0776846	c22	-0.038755	c32	-0.0891592	c32	-0.0289891	c31	-0.0391455	c31	0	1	0	0	0	0	0	0	0	0
AI733141	0.0371831	c1	-0.0160766	c1	-0.0806383	c2	-0.088003	c2	-0.0273017	c21	-0.0241242	c21	-0.0744389	c22	-0.0645657	c22	0.0112429	c32	-0.0168531	c32	0.0355669	c31	-0.0109891	c31	0	1	0	0	0	0	0	0	0	0
AI792597	-0.024858	c1	0.257064	c1	0.0524728	c2	0.0772869	c2	-0.0474369	c21	-0.0194852	c21	0.0250711	c22	0.0376096	c22	0.054629	c32	0.0183958	c32	-0.0628414	c31	-0.10032	c31	0	0	0	0	0	0	0		0	0
AI863545	0.0705547	c1	0.0259693	c1	0.0319558	c2	0.0243785	c2	-0.0544073	c21	-0.0946957	c21	-0.0389347	c22	-0.0397336	c22	0.0826356	c32	0.0733199	c32	0.08046	c31	0.0827218	c31	0	1	0	0	0	0	0	0	0	0
AK022356	-0.0261867	c1	-0.0184055	c1	0.059656	c2	0.0661577	c2	-0.14776	c21	0.0183945	c21	0.122922	c22	0.0575889	c22	0.0350154	c32	-0.0305013	c32	0.0509538	c31	-0.0282135	c31	0	1	0	0	0	0	0	0	0	0
AK023312	-0.0013353	c1	-0.0548968	c1	0.0313598	c2	0.0412835	c2	-0.0951758	c21	-0.118121	c21	-0.0858074	c22	-0.0498482	c22	0.0514932	c32	0.0735219	c32	-0.0105706	c31	0.00262704	c31	0	1	0	0	0	0	0	0	0	0
AK023856	0.101502	c1	0.0687497	c1	-0.138737	c2	-0.203201	c2	-0.0880911	c21	-0.0119958	c21	0.101444	c22	0.144922	c22	0.0197822	c32	-0.00151239	c32	0.125757	c31	0.118327	c31	0	1	0	0	0	0	0	0	0	0
AK024998	0.114497	c1	0.010775	c1	-0.0483097	c2	-0.0408662	c2	-0.110386	c21	-0.074053	c21	0.0176839	c22	-0.0020468	c22	-0.0231673	c32	-0.0177533	c32	0.0953695	c31	0.0555152	c31	0	1	0	0	0	0	0	0	0	0
AK056115	0.0272556	c1	-0.0330993	c1	-0.0642315	c2	-0.0697531	c2	-0.175054	c21	-0.163908	c21	-0.0341358	c22	-0.0406165	c22	-0.00728583	c32	-0.0427062	c32	-0.0368608	c31	-0.0729051	c31	0	1	0	-21	0	0	0	1	1	1	.0.-21.0.0.0
AK091021	-0.0524639	c1	-0.0509057	c1	-0.00728833	c2	-0.00816446	c2	0.0183332	c21	0.020024	c21	-0.0263983	c22	-0.0245569	c22	0.010454	c32	0.00224946	c32	-0.0958333	c31	-0.138114	c31	0	1	0	0	0	0	0	0	0	0
AK091830	0.0966116	c1	0.0733738	c1	-0.0297866	c2	-0.0201867	c2	-0.11037	c21	-0.0820318	c21	-0.0397721	c22	-0.0305785	c22	-0.00496785	c32	-0.0186877	c32	0.0233978	c31	-0.012364	c31	0	0	0	0	0	0	0		0	0
AK092541	0.0310271	c1	-0.00894054	c1	-0.013966	c2	-0.0133276	c2	0.0849495	c21	0.135956	c21	0.0407749	c22	0.07057	c22	0.0412593	c32	0.017417	c32	-0.0172431	c31	-0.0638768	c31	0	1	0	0	0	0	0	0	0	0
AK094352	0.115952	c1	0.0189209	c1	-0.0855476	c2	-0.0606251	c2	-0.0163964	c21	0.00833297	c21	0.0274355	c22	0.0296469	c22	-0.0893164	c32	-0.0764736	c32	0.0597254	c31	-0.0479371	c31	0	1	0	0	0	0	0	0	0	0
AK094903	0.0331253	c1	0.0160847	c1	-0.0139208	c2	-0.0114166	c2	-0.0822611	c21	-0.030971	c21	0.0992472	c22	0.072519	c22	-0.00864689	c32	-0.0596921	c32	-0.0728487	c31	-0.067741	c31	0	1	0	0	0	0	0	0	0	0
AK097571	0.04219	c1	0.0597213	c1	-0.0166802	c2	-0.0205162	c2	-0.0232577	c21	-0.00824489	c21	0.0557189	c22	0.049763	c22	-0.0393642	c32	-0.072372	c32	-0.0273781	c31	-0.0520571	c31	0	1	0	0	0	0	0	0	0	0
AK097658	0.09165	c1	0.0470114	c1	-0.0339365	c2	-0.02938	c2	0.0271398	c21	0.0136968	c21	0.00210282	c22	-0.0041002	c22	0.00558956	c32	-0.0172879	c32	-0.0153765	c31	-0.0301091	c31	0	1	0	0	0	0	0	0	0	0
AK098170	0.0404192	c1	0.0294888	c1	-0.0288611	c2	-0.00398303	c2	0.0175539	c21	-0.0127413	c21	-0.105294	c22	-0.067589	c22	0.014951	c32	-0.0152449	c32	-0.0696737	c31	-0.0590579	c31	0	0	0	0	0	0	0		0	0
AK098306	0.149805	c1	0.10848	c1	-0.0642354	c2	-0.0678119	c2	-0.0526935	c21	-0.0029026	c21	0.0165988	c22	0.025064	c22	0.044611	c32	-0.00672666	c32	-0.0272299	c31	-0.0642511	c31	0	1	0	0	0	0	0	0	0	0
AK127500	0.155784	c1	0.107878	c1	-0.0765384	c2	-0.0644198	c2	-0.0230076	c21	-0.0355434	c21	-0.0200626	c22	-0.0316921	c22	-0.0260558	c32	-0.00444949	c32	0.0712804	c31	0.0473193	c31	0	0	0	0	0	0	0		0	0
AK127572	-0.00888115	c1	-0.03071	c1	-0.00341278	c2	0.00270226	c2	-0.132633	c21	-0.116875	c21	0.0037915	c22	0.00865139	c22	0.0358654	c32	0.0158937	c32	-0.0220506	c31	-0.0144416	c31	0	0	0	0	0	0	0		0	0
AK127877	0.0298572	c1	0.128733	c1	0.0450182	c2	0.0903378	c2	0.0363735	c21	0.0056379	c21	-0.0459336	c22	-0.0278991	c22	0.0590802	c32	0.0224223	c32	-0.217947	c31	-0.0263751	c31	0	1	0	0	0	0	0	0	0	0
AK130830	0.107863	c1	0.160719	c1	-0.00892559	c2	-0.0667994	c2	-0.259369	c21	-0.192161	c21	0.0377947	c22	0.0575099	c22	-0.0560064	c32	-0.0751475	c32	0.166324	c31	0.169854	c31	0	1	0	-21	31	0	0	1	1	1	.0.-21.31.0.0
AK131516	0.144785	c1	0.100134	c1	-0.118634	c2	-0.0570745	c2	-0.211951	c21	-0.198568	c21	-0.00705557	c22	-0.0291703	c22	-0.0352371	c32	-0.0526468	c32	0.104518	c31	0.0402433	c31	0	1	0	-21	0	0	0	1	1	1	.0.-21.0.0.0
AKAP8L	0.129768	c1	0.076057	c1	0.00955082	c2	0.00228105	c2	-0.0212253	c21	0.0399675	c21	0.0522734	c22	0.0612996	c22	-0.000785643	c32	-0.0245208	c32	-0.0117128	c31	-0.0705887	c31	0	1	0	0	0	0	0	0	0	0
ALDH3B1	-0.159748	c1	-0.168219	c1	-0.0987709	c2	-0.0798204	c2	0.0106467	c21	0.129849	c21	0.0486395	c22	0.0503998	c22	0.0196292	c32	0.0209813	c32	-0.181784	c31	-0.191369	c31	0	1	-1	0	0	-31	0	1	1	1	.-1.0.0.-31.0
ANGPTL4	0.0906613	c1	0.064193	c1	-0.0129088	c2	-0.0446544	c2	-0.0943857	c21	-0.0716561	c21	0.0144766	c22	0.000452422	c22	0.0188079	c32	-0.0244967	c32	-0.00812197	c31	-0.0456201	c31	0	1	0	0	0	0	0	0	0	0
ANLN	-0.0163007	c1	0.0101636	c1	0.00618978	c2	0.0449606	c2	-0.0546828	c21	-0.0166629	c21	0.0773005	c22	0.0724682	c22	-0.018963	c32	-0.0446368	c32	-0.0421595	c31	-0.0142479	c31	0	1	0	0	0	0	0	0	0	0
ANP32P	-0.201159	c1	-0.117944	c1	0.0526594	c2	0.0646748	c2	-0.0396881	c21	-0.0225196	c21	0.0769018	c22	-0.00980928	c22	0.0478966	c32	0.0104151	c32	-0.184323	c31	-0.0369924	c31	0	0	0	0	0	0	0		0	0
ANXA8	-0.116518	c1	-0.0856486	c1	-0.0925939	c2	-0.0741556	c2	-0.00020855	c21	0.0666409	c21	-0.00937224	c22	-0.0122022	c22	0.0881228	c32	0.0851609	c32	-0.177286	c31	-0.12004	c31	0	0	0	0	0	0	0		0	0
AOAH	0.0622109	c1	0.0121952	c1	-0.0657447	c2	-0.036848	c2	-0.103781	c21	-0.105703	c21	-0.0762871	c22	-0.0512058	c22	0.00208996	c32	-0.0307375	c32	0.0184388	c31	0.025184	c31	0	0	0	0	0	0	0		0	0
APLP2	0.0254672	c1	0.013804	c1	0.00119962	c2	0.00936724	c2	-0.00709313	c21	-0.0345282	c21	-0.0231778	c22	-0.0104183	c22	0.0423758	c32	0.0114952	c32	-0.101274	c31	-0.0889803	c31	0	1	0	0	0	0	0	0	0	0
ARHGAP17	0.0907612	c1	0.071324	c1	-0.0405528	c2	-0.0365687	c2	-0.0656966	c21	-0.0207738	c21	0.0407815	c22	0.0454302	c22	-0.00364556	c32	-0.0215831	c32	-0.0211264	c31	-0.0668276	c31	1	1	0	0	0	0	0	0	0	0
ARHGAP18	0.128447	c1	0.094033	c1	-0.0611247	c2	-0.0447319	c2	-0.0458037	c21	-0.0317529	c21	-0.00393903	c22	-0.000593956	c22	0.029635	c32	0.0239444	c32	-0.0106171	c31	-0.0194645	c31	0	1	0	0	0	0	0	0	0	0
ARID1B	0.0726278	c1	0.0663508	c1	-0.000620643	c2	0.00147497	c2	0.0287027	c21	0.0141269	c21	0.0682637	c22	0.105813	c22	0.0252814	c32	0.0214112	c32	-0.0919154	c31	-0.0755535	c31	0	1	0	0	0	0	0	0	0	0
ARL3	0.187908	c1	0.138836	c1	-0.0302561	c2	-0.0143122	c2	0.0294287	c21	0.0385103	c21	0.0255674	c22	0.0186878	c22	-0.019165	c32	-0.020545	c32	-0.0808379	c31	-0.056178	c31	0	1	0	0	0	0	0	0	0	0
ARL6IP1	-0.115698	c1	-0.116884	c1	0.0397562	c2	0.0402826	c2	-0.0264107	c21	0.00578327	c21	0.070645	c22	0.0727195	c22	0.0309979	c32	-0.0372981	c32	0.00949123	c31	-0.00579058	c31	0	1	0	0	0	0	0	0	0	0
ARMC46	-0.0066941	c1	-0.0280294	c1	-0.0185346	c2	0.000317673	c2	0.117718	c21	0.055861	c21	-0.107662	c22	-0.0958227	c22	-0.0248839	c32	-0.063098	c32	-0.103723	c31	-0.111974	c31	0	0	0	0	0	0	0		0	0
ARPC1A	0.14762	c1	0.0780149	c1	-0.0287141	c2	-0.00295032	c2	-0.0828463	c21	-0.101828	c21	-0.065692	c22	-0.0344115	c22	-0.00112207	c32	-0.0199421	c32	0.1136	c31	0.106646	c31	0	1	0	0	0	0	0	0	0	0
ARPC2	-0.0426366	c1	-0.0110677	c1	0.0149131	c2	0.00342446	c2	-0.0333981	c21	-0.0714433	c21	-0.0327684	c22	-0.00775063	c22	0.0851828	c32	0.020518	c32	-0.0963181	c31	-0.0431028	c31	0	1	0	0	0	0	0	0	0	0
ARPC3	0.0283802	c1	0.0869011	c1	-0.0141058	c2	0.000416067	c2	-0.246787	c21	-0.219353	c21	-0.0529598	c22	-0.04144	c22	-0.0264747	c32	-0.0253698	c32	0.128186	c31	0.0522961	c31	0	1	0	-21	0	0	0	1	1	1	.0.-21.0.0.0
ARPC4	0.053334	c1	0.0403719	c1	-0.016244	c2	-0.00722511	c2	0.0112563	c21	0.0336158	c21	-0.0150848	c22	-0.0209693	c22	0.018805	c32	0.0300222	c32	-0.0406856	c31	-0.0430808	c31	1	1	0	0	0	0	0	0	0	0
ATAD2	0.136534	c1	0.0352359	c1	-0.05977	c2	-0.0274333	c2	-0.0788875	c21	-0.104668	c21	-0.106605	c22	-0.0941453	c22	0.0741948	c32	0.0659036	c32	0.0631412	c31	0.0486286	c31	0	0	0	0	0	0	0		0	0
ATF1	0.0499093	c1	0.045144	c1	-0.034105	c2	-0.0559327	c2	0.0301772	c21	0.0379431	c21	-0.0324291	c22	-0.0410198	c22	-0.0121518	c32	-0.0169525	c32	-0.0312865	c31	-0.050219	c31	0	1	0	0	0	0	0	0	0	0
ATG3	-0.0816196	c1	-0.0252664	c1	0.0394773	c2	0.0549279	c2	-0.171426	c21	-0.091586	c21	0.0690012	c22	0.0621144	c22	0.00993592	c32	-0.0178423	c32	-0.0298952	c31	-0.0726664	c31	0	1	0	0	0	0	0	0	0	0
ATP5C1	0.0605915	c1	0.0511167	c1	-0.0276399	c2	-0.00604474	c2	-0.00839655	c21	0.0163906	c21	0.0734605	c22	0.0579813	c22	-0.0641152	c32	-0.0737751	c32	-0.00370801	c31	-0.0238343	c31	0	1	0	0	0	0	0	0	0	0
ATP5J2	0.0450995	c1	0.00776764	c1	-0.0264235	c2	-0.00842746	c2	-0.208585	c21	-0.178254	c21	-0.0574553	c22	-0.0698463	c22	0.0159191	c32	0.00125453	c32	0.0284299	c31	-0.0182226	c31	0	1	0	-21	0	0	0	1	1	1	.0.-21.0.0.0
AV681673	0.153143	c1	0.121743	c1	-0.0721181	c2	-0.0626312	c2	0.108557	c21	0.0932469	c21	-0.103709	c22	-0.11355	c22	0.0731778	c32	0.0697166	c32	-0.0750041	c31	-0.122653	c31	0	0	0	0	0	0	0		0	0
AV741821	-0.171564	c1	-0.150111	c1	0.0105399	c2	0.0214574	c2	-0.125726	c21	-0.11442	c21	-0.0241584	c22	-0.0376612	c22	0.048542	c32	-0.0010129	c32	-0.0126699	c31	0.0148696	c31	0	1	-1	0	0	0	0	0	0	1	.-1.0.0.0.0
AW241724	-0.04427	c1	-0.0643539	c1	0.00479449	c2	0.0438673	c2	-0.037599	c21	-0.0306335	c21	0.0311123	c22	0.0204263	c22	-0.0305306	c32	-0.0488772	c32	-0.0525808	c31	0.00241182	c31	0	0	0	0	0	0	0		0	0
AW418496	-0.0312019	c1	-0.0181536	c1	-0.00291114	c2	-0.00543523	c2	-0.0384536	c21	-0.00530127	c21	0.084197	c22	0.0560716	c22	0.031013	c32	-0.0217558	c32	-0.157139	c31	-0.0700788	c31	0	1	0	0	0	0	0	0	0	0
AW662723	-0.0979491	c1	-0.104478	c1	0.0243491	c2	0.0160485	c2	-0.109579	c21	-0.0920027	c21	0.0534029	c22	0.0853711	c22	-0.0202912	c32	-0.0920785	c32	-0.038833	c31	-0.0298572	c31	0	0	0	0	0	0	0		0	0
AX748230	0.0836232	c1	0.0263523	c1	-0.0232687	c2	-0.000155039	c2	0.110154	c21	0.097808	c21	-0.0463812	c22	-0.0421421	c22	0.00262625	c32	0.0132012	c32	-0.109209	c31	-0.117835	c31	0	1	0	0	0	0	0	0	0	0
AY054401	0.0545044	c1	0.0409054	c1	-0.00572023	c2	0.0167269	c2	-0.0399142	c21	-0.0138251	c21	0.000731405	c22	-0.00117704	c22	0.0909116	c32	0.064894	c32	-0.106905	c31	-0.0922614	c31	0	0	0	0	0	0	0		0	0
AY176665	0.0733254	c1	-0.00502569	c1	-0.0382781	c2	-0.0356153	c2	-0.0481036	c21	-0.0234694	c21	-0.0685026	c22	-0.0721703	c22	0.04759	c32	0.0384478	c32	-0.0376823	c31	-0.081377	c31	0	0	0	0	0	0	0		0	0
AY480055	0.155034	c1	0.0769137	c1	0.0672834	c2	0.0280599	c2	-0.0706198	c21	-0.078643	c21	0.018717	c22	0.0393058	c22	-0.00901193	c32	-0.0270292	c32	0.0986236	c31	0.0697721	c31	0	1	0	0	0	0	0	0	0	0
BACH	0.0921645	c1	0.0186091	c1	-0.0580022	c2	-0.0435866	c2	-0.109327	c21	-0.0949268	c21	-0.00683654	c22	-0.000615905	c22	-0.0161032	c32	-0.0212789	c32	0.0741588	c31	0.0710661	c31	0	1	0	0	0	0	0	0	0	0
BAG1	-0.123342	c1	-0.119404	c1	0.0317998	c2	0.0227707	c2	0.0315539	c21	0.0596252	c21	0.0337999	c22	0.0173852	c22	0.101218	c32	0.0751365	c32	-0.196159	c31	-0.112066	c31	0	1	0	0	0	0	0	0	0	0
BAG2	0.070675	c1	0.025556	c1	-0.0282923	c2	-0.00191217	c2	0.142104	c21	0.0474412	c21	-0.0524696	c22	-0.0204632	c22	0.044092	c32	-0.0244569	c32	-0.164385	c31	-0.0125601	c31	0	1	0	0	0	0	0	0	0	0
BAG3	0.0465475	c1	0.117138	c1	-0.0046597	c2	0.012791	c2	0.0360043	c21	0.112567	c21	-0.00470885	c22	0.0522817	c22	0.0156535	c32	-0.0614177	c32	-0.0764859	c31	-0.0793441	c31	0	1	0	0	0	0	0	0	0	0
BAIAP2	0.11186	c1	0.0691466	c1	-0.0567173	c2	-0.0432754	c2	-0.0724741	c21	-0.0598502	c21	-0.00319166	c22	-0.000350601	c22	0.00378411	c32	-0.00522183	c32	0.0483764	c31	0.0269398	c31	0	1	0	0	0	0	0	0	0	0
BAIAP2L1	0.101632	c1	0.0375876	c1	-0.0250352	c2	-0.0396468	c2	-0.0409808	c21	-0.00936947	c21	0.0595327	c22	0.0293203	c22	-0.0192282	c32	-0.0332325	c32	0.0882272	c31	0.0126386	c31	0	0	0	0	0	0	0		0	0
BANK1	0.133035	c1	0.118643	c1	-0.0287259	c2	-0.00714692	c2	-0.0332049	c21	-0.00593383	c21	-0.0244541	c22	0.0118523	c22	0.0189743	c32	-0.0140077	c32	-0.0453821	c31	-0.0760496	c31	0	1	0	0	0	0	0	0	0	0
BAT4	0.0641469	c1	0.0262707	c1	-0.0809032	c2	-0.0875819	c2	-0.0127376	c21	0.0397914	c21	-0.00348255	c22	0.00196513	c22	-0.0119378	c32	-0.0568676	c32	0.00456137	c31	-0.0149411	c31	1	1	0	0	0	0	0	0	0	0
BC005233	0.0802078	c1	0.0605996	c1	0.0209629	c2	0.0256692	c2	-0.0434043	c21	-0.0790399	c21	-0.0343508	c22	-0.00287161	c22	0.115481	c32	0.0434157	c32	-0.0467196	c31	0.0399902	c31	0	0	0	0	0	0	0		0	0
BC006440	0.20322	c1	0.0996151	c1	-0.115097	c2	-0.137476	c2	-0.139068	c21	-0.111584	c21	0.0181595	c22	0.0647408	c22	-0.0275955	c32	-0.109636	c32	0.106371	c31	-0.00719407	c31	0	0	0	0	0	0	0		0	0
BC010922	0.0505637	c1	0.0685179	c1	0.00354438	c2	0.00458332	c2	-0.184526	c21	-0.109555	c21	0.0343579	c22	0.00988211	c22	-0.0477217	c32	-0.0267957	c32	0.163737	c31	0.0845248	c31	0	0	0	0	0	0	0		0	0
BC013912	-0.0934225	c1	-0.0829482	c1	0.0540256	c2	0.0564579	c2	-0.112893	c21	-0.0348172	c21	-0.0292022	c22	0.0195557	c22	0.0447052	c32	-0.00617779	c32	-0.0962281	c31	-0.0549005	c31	0	0	0	0	0	0	0		0	0
BC014506	0.131386	c1	0.139479	c1	-0.0251343	c2	-0.0213614	c2	-0.228259	c21	-0.0314452	c21	0.108958	c22	0.121017	c22	-0.0504069	c32	-0.0738265	c32	0.232807	c31	0.167889	c31	0	0	0	0	31	0	0		0	0
BC015538	0.126818	c1	0.0503629	c1	-0.103174	c2	-0.0511962	c2	-0.0232918	c21	0.000992573	c21	-0.0384238	c22	-0.0165317	c22	-0.0856937	c32	-0.129277	c32	0.0512889	c31	-0.0626876	c31	0	0	0	0	0	0	0		0	0
BC034424	0.0908791	c1	0.0589366	c1	-0.0746927	c2	-0.0619529	c2	0.0302275	c21	0.0389057	c21	-0.0784613	c22	-0.0710152	c22	0.00523422	c32	-0.059181	c32	-0.0424057	c31	-0.0243926	c31	0	0	0	0	0	0	0		0	0
BC035377	0.00359553	c1	-0.0461008	c1	-0.0375219	c2	-0.0259725	c2	-0.0990158	c21	-0.0615167	c21	-0.0231428	c22	0.00270916	c22	-0.0618965	c32	-0.101655	c32	-0.0462312	c31	-0.104612	c31	0	1	0	0	0	0	0	0	0	0
BC037836	-0.0818548	c1	-0.134806	c1	-0.0316447	c2	-0.0715231	c2	-0.0838977	c21	-0.113177	c21	-0.104397	c22	-0.100931	c22	-0.0395511	c32	-0.174929	c32	-0.097254	c31	-0.194035	c31	0	0	0	0	0	0	0		0	0
BC039104	0.0912515	c1	0.00782808	c1	-0.0191032	c2	0.00889847	c2	-0.189364	c21	-0.0743599	c21	-0.0657214	c22	-0.0581868	c22	0.0216721	c32	0.0221695	c32	0.157977	c31	-0.0177673	c31	0	1	0	0	0	0	0	0	0	0
BC040610	0.0412098	c1	-0.0080087	c1	-0.00957759	c2	-0.0181536	c2	-0.0666069	c21	-0.054647	c21	-0.066449	c22	-0.0712105	c22	0.0607762	c32	0.0079405	c32	-0.0347306	c31	-0.0932189	c31	0	0	0	0	0	0	0		0	0
BC042060	0.151139	c1	0.0852113	c1	-0.010254	c2	0.00427786	c2	-0.11923	c21	-0.089661	c21	-0.0720231	c22	-0.0583574	c22	0.0245941	c32	-0.0109151	c32	0.0983721	c31	0.0764014	c31	0	1	0	0	0	0	0	0	0	0
BC042816	0.139371	c1	0.0572935	c1	-0.0340067	c2	-0.00503475	c2	-0.128891	c21	-0.109121	c21	-0.0636565	c22	-0.058095	c22	-0.011359	c32	-0.0322369	c32	0.04882	c31	-0.0391695	c31	0	1	0	0	0	0	0	0	0	0
BC042855	0.0774192	c1	0.0429613	c1	-0.0474127	c2	-0.0382861	c2	-0.137377	c21	-0.0238702	c21	0.0419111	c22	0.0547902	c22	-0.00973579	c32	-0.0356567	c32	0.0593708	c31	-0.00791527	c31	0	1	0	0	0	0	0	0	0	0
BC043574	-0.0532665	c1	0.00878912	c1	-0.0533433	c2	-0.0746149	c2	-0.240609	c21	-0.199286	c21	0.0796538	c22	0.0696159	c22	-0.0580255	c32	-0.100676	c32	-0.0210976	c31	-0.0620892	c31	0	1	0	-21	0	0	0	1	1	1	.0.-21.0.0.0
BC044741	0.123616	c1	0.122616	c1	-0.0260468	c2	0.0304017	c2	-0.193235	c21	-0.0973536	c21	0.0761521	c22	0.0801765	c22	-0.0344289	c32	-0.0803796	c32	0.0817217	c31	0.031247	c31	0	1	0	0	0	0	0	0	0	0
BC048993	0.0314057	c1	-0.0160535	c1	-0.0298931	c2	-0.0450215	c2	0.0218829	c21	0.0527894	c21	-0.0485853	c22	0.000967447	c22	-0.0172182	c32	-0.0575916	c32	-0.05969	c31	-0.102072	c31	0	1	0	0	0	0	0	0	0	0
BCCIP	0.0617471	c1	0.0485073	c1	-0.0111015	c2	-0.0134033	c2	-0.0747561	c21	-0.0278535	c21	0.00668164	c22	0.0415471	c22	0.000121014	c32	-0.0351878	c32	0.0148399	c31	0.00840359	c31	0	1	0	0	0	0	0	0	0	0
BE043072	0.0100012	c1	-0.00776243	c1	-0.00835887	c2	0.0176735	c2	-0.0631956	c21	-0.0746016	c21	-0.0298462	c22	-0.0186645	c22	0.0986701	c32	0.0441752	c32	-0.0614753	c31	-0.0173868	c31	0	1	0	0	0	0	0	0	0	0
BE048560	0.177829	c1	0.206526	c1	-0.0717389	c2	-0.034188	c2	-0.055636	c21	0.0124594	c21	0.107547	c22	0.0978226	c22	-0.0819917	c32	-0.0699721	c32	0.0323687	c31	-0.0935835	c31	0	1	1	0	0	0	0	0	0	1	.1.0.0.0.0
BE785612	0.135013	c1	0.0839961	c1	0.0010338	c2	0.016921	c2	-0.0635618	c21	-0.0853944	c21	-0.180685	c22	-0.153898	c22	0.174819	c32	0.118483	c32	0.0486154	c31	0.0691445	c31	0	1	0	0	-22	0	0	1	0	1	.0.0.-22.0.0
BF062994	0.079836	c1	0.0285798	c1	-0.00382476	c2	-0.0107923	c2	-0.0990978	c21	-0.05288	c21	-0.0634419	c22	-0.045675	c22	-0.0268672	c32	-0.0650614	c32	-0.0155421	c31	-0.0756066	c31	0	1	0	0	0	0	0	0	0	0
BF245041	-0.0446017	c1	-0.0612221	c1	-0.00437799	c2	-0.000406671	c2	-0.033675	c21	0.000751596	c21	0.0234656	c22	0.038705	c22	0.0410523	c32	-0.041587	c32	-0.0986162	c31	-0.0786092	c31	0	1	0	0	0	0	0	0	0	0
BF594738	0.0710722	c1	0.00688534	c1	-0.00779334	c2	0.0168648	c2	-0.171783	c21	-0.165972	c21	-0.168262	c22	-0.136409	c22	0.165106	c32	0.135659	c32	0.143375	c31	0.139807	c31	0	1	0	-21	0	0	0	1	1	1	.0.-21.0.0.0
BF688062	0.0693528	c1	0.0521736	c1	0.0594994	c2	0.0519907	c2	-0.00722761	c21	-0.0287184	c21	0.0361921	c22	0.0548998	c22	0.047245	c32	-0.00340961	c32	0.0177263	c31	-0.0324172	c31	0	1	0	0	0	0	0	0	0	0
BG181201	0.0684493	c1	0.0424208	c1	-0.0154552	c2	-0.0236545	c2	-0.149871	c21	0.0565805	c21	0.0703854	c22	0.0730508	c22	-0.0614939	c32	-0.104408	c32	0.00197461	c31	-0.082899	c31	0	0	0	0	0	0	0		0	0
BG189068	-0.0654027	c1	0.0378143	c1	0.067516	c2	0.0455164	c2	0.0160262	c21	0.061911	c21	0.0489066	c22	0.0313233	c22	-0.0116978	c32	0.00930149	c32	-0.0462314	c31	-0.0531402	c31	0	1	0	0	0	0	0	0	0	0
BG194390	-0.013763	c1	0.00426044	c1	0.0502415	c2	0.0432329	c2	-0.00617172	c21	0.00127021	c21	0.00124157	c22	0.0195817	c22	0.0523215	c32	0.0257805	c32	-0.165214	c31	-0.177189	c31	0	0	0	0	0	-31	0		1	0
BG203790	0.0671388	c1	0.0336337	c1	0.00545778	c2	0.0298196	c2	-0.243605	c21	-0.181308	c21	0.0103572	c22	0.0255079	c22	0.00211551	c32	-0.0282401	c32	0.116518	c31	0.094786	c31	0	1	0	-21	0	0	0	1	1	1	.0.-21.0.0.0
BG221753	0.163753	c1	0.0843177	c1	-0.0696319	c2	-0.0482064	c2	-0.0197714	c21	-0.038792	c21	-0.0144151	c22	0.000886488	c22	-0.0264738	c32	-0.0404475	c32	0.0140183	c31	-0.0277157	c31	0	1	0	0	0	0	0	0	0	0
BG425462	-0.0403522	c1	-0.0445453	c1	0.00538009	c2	0.00833243	c2	-0.11037	c21	-0.0865567	c21	0.0491249	c22	0.033476	c22	0.00596143	c32	-0.0362006	c32	-0.00771271	c31	-0.0477337	c31	0	0	0	0	0	0	0		0	0
BG505700	-0.0366691	c1	-0.0453076	c1	0.0104115	c2	0.0190688	c2	-0.108172	c21	-0.120758	c21	-0.0701858	c22	-0.00469757	c22	0.0987647	c32	0.0408083	c32	-0.174489	c31	0.0171482	c31	0	1	0	0	0	0	0	0	0	0
BI462136	0.0898348	c1	0.121414	c1	0.0136232	c2	0.0144342	c2	-0.069664	c21	-0.235056	c21	0.068117	c22	-0.00966951	c22	-0.0217947	c32	-0.052866	c32	0.174065	c31	0.242723	c31	0	1	0	0	31	0	0	0	0	0
BI762388	0.113118	c1	0.0709954	c1	-0.0127603	c2	-0.014686	c2	-0.182357	c21	-0.112956	c21	0.0174254	c22	0.10421	c22	-0.0225697	c32	-0.104124	c32	0.0200567	c31	0.0652332	c31	0	1	0	0	0	0	0	0	0	0
BI825982	0.0837998	c1	0.0764828	c1	-0.0559485	c2	-0.0563874	c2	0.0271922	c21	0.0514257	c21	0.0336859	c22	0.0436977	c22	-0.0525895	c32	-0.0583576	c32	-0.0292876	c31	-0.129322	c31	0	1	0	0	0	0	0	0	0	0
BIN2	0.0688438	c1	0.027803	c1	-0.00458692	c2	-0.0179646	c2	-0.0546925	c21	-0.0316642	c21	-0.0273265	c22	-0.0168691	c22	0.0230304	c32	0.0110661	c32	-0.0269416	c31	-0.0204985	c31	0	0	0	0	0	0	0		0	0
BM461531	0.201973	c1	0.185414	c1	-0.00265767	c2	0.0178735	c2	0.0033515	c21	0.00635957	c21	-0.0254623	c22	-0.00465196	c22	0.00235922	c32	-0.0394834	c32	-0.0382614	c31	-0.0648983	c31	0	1	1	0	0	0	0	0	0	1	.1.0.0.0.0
BM681834	0.132072	c1	0.109463	c1	0.0166465	c2	0.0195475	c2	-0.1146	c21	-0.100959	c21	-0.0355665	c22	-0.0209494	c22	0.075194	c32	0.0634279	c32	0.103041	c31	0.134899	c31	0	1	0	0	0	0	0	0	0	0
BM684766	0.0531783	c1	0.0572969	c1	-0.119626	c2	-0.0980092	c2	-0.161572	c21	-0.0974668	c21	-0.0484909	c22	-0.013946	c22	0.0416054	c32	0.0374242	c32	0.0111646	c31	0.0701323	c31	0	1	0	0	0	0	0	0	0	0
bogus	-0.0737297	c1	-0.0797622	c1	-0.0488679	c2	-0.0381572	c2	-0.0288672	c21	-0.000818521	c21	0.0632433	c22	0.0545082	c22	-0.0480933	c32	-0.0332345	c32	-0.084652	c31	-0.082991	c31	0	0	0	0	0	0	0		0	0
BRMS1	0.0898259	c1	0.0323242	c1	-0.00300259	c2	-0.00602951	c2	0.101132	c21	0.0314886	c21	-0.0838414	c22	-0.0201861	c22	0.0819796	c32	0.0542864	c32	-0.137239	c31	-0.11215	c31	0	1	0	0	0	0	0	0	0	0
BSG	0.210746	c1	0.142843	c1	0.072712	c2	0.125356	c2	0.0978454	c21	0.0978355	c21	0.12623	c22	0.143023	c22	-0.0507202	c32	-0.0657663	c32	-0.0153245	c31	-0.0424362	c31	0	1	0	0	0	0	0	0	0	0
BTK	0.0871257	c1	0.0707844	c1	-0.00112699	c2	0.0171051	c2	-0.101711	c21	-0.0611614	c21	-0.0618598	c22	0.00676098	c22	0.0356987	c32	-0.0107505	c32	0.000344003	c31	0.0145324	c31	0	1	0	0	0	0	0	0	0	0
BU533525	0.022477	c1	0.0373383	c1	-0.0593043	c2	-0.0690798	c2	-0.0222673	c21	-0.0278993	c21	0.018564	c22	0.00117176	c22	-0.0293974	c32	-0.0211285	c32	-0.0421561	c31	-0.0250308	c31	0	1	0	0	0	0	0	0	0	0
BU568189	0.0737203	c1	0.0219577	c1	-0.0360195	c2	-0.0108298	c2	-0.0603465	c21	-0.0659325	c21	-0.0560235	c22	-0.0551236	c22	-0.00368861	c32	-0.0130545	c32	-0.0193608	c31	-0.0413701	c31	0	1	0	0	0	0	0	0	0	0
BU607353	0.0650974	c1	0.0176502	c1	-0.0941119	c2	-0.0442559	c2	0.014957	c21	0.0188763	c21	-0.00615898	c22	-0.0138229	c22	-0.00284694	c32	-0.00583879	c32	0.0245678	c31	0.0249705	c31	0	1	0	0	0	0	0	0	0	0
BU630466	0.16095	c1	0.131218	c1	-0.0912912	c2	-0.0741636	c2	-0.117973	c21	-0.105933	c21	0.000256743	c22	0.000782123	c22	-0.061228	c32	-0.0838516	c32	0.116173	c31	0.00885123	c31	0	1	0	0	0	0	0	0	0	0
BX089034	-0.0159774	c1	-0.0430859	c1	-0.00468985	c2	0.0114007	c2	0.117891	c21	0.088034	c21	-0.0534027	c22	-0.0254974	c22	0.078033	c32	0.0259523	c32	-0.105605	c31	-0.10486	c31	0	0	0	0	0	0	0		0	0
BX090666	-0.0664171	c1	-0.0768984	c1	0.0121539	c2	0.008905	c2	-0.119231	c21	-0.0916624	c21	-0.0248189	c22	0.00147635	c22	-0.00966946	c32	-0.080209	c32	-0.0551155	c31	-0.109352	c31	0	1	0	0	0	0	0	0	0	0
BX100818	0.0646653	c1	0.0144577	c1	-0.019404	c2	-0.0326703	c2	-0.0209786	c21	-0.0456831	c21	-0.0814382	c22	-0.0783679	c22	0.0768293	c32	0.0470196	c32	-0.0272366	c31	-0.0626715	c31	0	1	0	0	0	0	0	0	0	0
BX103408	0.0104413	c1	-0.035012	c1	-0.0153409	c2	-0.0380496	c2	0.0397357	c21	0.165724	c21	0.033539	c22	-0.0058951	c22	0.0380524	c32	0.0246388	c32	0.00329298	c31	-0.0785916	c31	0	1	0	0	0	0	0	0	0	0
BX104605	0.0882144	c1	0.0542265	c1	-0.0570711	c2	-0.0334675	c2	-0.149615	c21	-0.136349	c21	-0.0484386	c22	-0.024714	c22	0.022472	c32	-0.0237457	c32	0.152076	c31	0.141409	c31	0	1	0	0	0	0	0	0	0	0
BX537644	0.0758262	c1	0.0269345	c1	-0.0262215	c2	-0.0115545	c2	-0.0905375	c21	-0.0662515	c21	0.0244304	c22	0.0286077	c22	-0.0276829	c32	-0.0288898	c32	0.0418922	c31	-0.00632923	c31	0	1	0	0	0	0	0	0	0	0
BX537772	-0.0258574	c1	0.0241994	c1	0.0121374	c2	-0.0408845	c2	-0.200647	c21	-0.202274	c21	0.127104	c22	0.13823	c22	-0.139893	c32	-0.175047	c32	0.153064	c31	0.100003	c31	0	1	0	-21	0	0	0	1	1	1	.0.-21.0.0.0
C12orf45	0.097268	c1	0.0567393	c1	-0.00493438	c2	-0.00258672	c2	-0.139739	c21	-0.0740926	c21	0.0571993	c22	0.0618828	c22	-0.0123433	c32	-0.0295682	c32	0.0034485	c31	-0.0695877	c31	0	1	0	0	0	0	0	0	0	0
C14orf112	0.00996037	c1	-0.0170877	c1	0.0205513	c2	0.0319163	c2	-0.0932851	c21	-0.0701402	c21	0.0946709	c22	0.0809366	c22	-0.00200564	c32	-0.0517163	c32	-0.0528727	c31	-0.0113121	c31	0	0	0	0	0	0	0		0	0
C14orf166	0.0704485	c1	0.0857017	c1	-0.0324385	c2	0.0222471	c2	0.0915687	c21	0.082883	c21	-0.055382	c22	-0.040741	c22	0.00286144	c32	0.00346323	c32	-0.0942383	c31	-0.0897469	c31	0	1	0	0	0	0	0	0	0	0
C14orf2	0.0339532	c1	0.0116248	c1	-0.0350053	c2	-0.0165513	c2	-0.144197	c21	-0.109915	c21	0.0195246	c22	0.00717073	c22	-0.0303009	c32	-0.0239479	c32	0.000657659	c31	-0.0530648	c31	0	1	0	0	0	0	0	0	0	0
C19orf33	0.116593	c1	0.0540797	c1	-0.0277201	c2	-0.00105407	c2	-0.0204051	c21	0.00660989	c21	0.00281641	c22	0.0263716	c22	-0.00810223	c32	-0.0317045	c32	0.00204348	c31	-0.0435544	c31	0	0	0	0	0	0	0		0	0
C19orf43	0.200551	c1	0.135911	c1	-0.109683	c2	-0.0906302	c2	-0.106918	c21	-0.151397	c21	0.0216245	c22	0.0384762	c22	0.00274835	c32	-0.0807875	c32	0.046817	c31	0.106984	c31	0	1	0	0	0	0	0	0	0	0
c19orf53	-0.012841	c1	-0.0421834	c1	0.00128908	c2	0.0151932	c2	-0.114634	c21	-0.0911171	c21	-0.0450161	c22	-0.031317	c22	0.0290845	c32	0.0148767	c32	0.0576273	c31	0.0161706	c31	0	1	0	0	0	0	0	0	0	0
C1orf121	0.130028	c1	0.0710005	c1	-0.116419	c2	-0.112056	c2	-0.0106221	c21	-0.0989458	c21	-0.104555	c22	-0.0964156	c22	-0.0827727	c32	-0.0766906	c32	0.0963867	c31	0.0433152	c31	0	1	0	0	0	0	0	0	0	0
C1QBP	0.0674936	c1	0.0148794	c1	-0.0257488	c2	-0.0084111	c2	-0.0997985	c21	-0.0788884	c21	-0.00345985	c22	-0.00892848	c22	0.0062254	c32	-0.0212938	c32	0.0727615	c31	-0.0434961	c31	0	0	0	0	0	0	0		0	0
C1QBP	0.202271	c1	0.145733	c1	-0.0740985	c2	-0.0537445	c2	0.0137638	c21	-0.0263728	c21	-0.0348576	c22	-0.0116909	c22	0.00830682	c32	-0.014919	c32	-0.00562581	c31	0.0262541	c31	0	0	0	0	0	0	0		0	0
C20orf24	0.0676535	c1	0.00591987	c1	-0.0496272	c2	-0.0414655	c2	-0.031066	c21	-0.0142524	c21	-0.018118	c22	0.0723212	c22	0.0816547	c32	0.0014302	c32	-0.0155155	c31	-0.0421168	c31	0	0	0	0	0	0	0		0	0
c21orf59	-0.00430144	c1	-0.043212	c1	-0.0220095	c2	-0.0171282	c2	-0.0447072	c21	-0.0365443	c21	-0.0452763	c22	-0.0252242	c22	-0.00553743	c32	-0.0948307	c32	-0.0776753	c31	-0.108636	c31	0	1	0	0	0	0	0	0	0	0
C22orf16	0.187468	c1	0.0895443	c1	-0.120316	c2	-0.100975	c2	-0.177394	c21	-0.132511	c21	0.0689284	c22	0.0588289	c22	-0.089905	c32	-0.0574425	c32	0.150144	c31	0.0910016	c31	0	1	0	0	0	0	0	0	0	0
C2orf25	0.00493626	c1	-0.00381724	c1	-0.00546175	c2	0.00661657	c2	-0.0865332	c21	-0.0592291	c21	0.0294004	c22	0.0388175	c22	0.0042297	c32	-0.0032952	c32	-0.00379761	c31	-0.0530481	c31	0	1	0	0	0	0	0	0	0	0
C3ORF19	-0.0597029	c1	-0.0475773	c1	0.0484605	c2	0.0417306	c2	-0.0428648	c21	-0.0106045	c21	0.092115	c22	0.0273892	c22	0.043498	c32	-0.0121782	c32	-0.234095	c31	-0.0691238	c31	0	1	0	0	0	0	0	0	0	0
C6orf106	0.0195817	c1	0.0990342	c1	0.0531364	c2	0.0575522	c2	0.0821367	c21	0.0701628	c21	-0.0361927	c22	-0.0182342	c22	0.0596471	c32	0.0646803	c32	-0.129161	c31	-0.155279	c31	0	0	0	0	0	0	0		0	0
C7orf11	0.146533	c1	0.0678643	c1	-0.0388473	c2	-0.00297598	c2	-0.123839	c21	-0.0249088	c21	0.112268	c22	0.089783	c22	-0.0371827	c32	-0.0618563	c32	0.0554419	c31	-0.041526	c31	0	1	0	0	0	0	0	0	0	0
C8orf44	-0.0623328	c1	-0.0822143	c1	0.050983	c2	0.057132	c2	-0.149958	c21	-0.0515042	c21	0.114351	c22	0.118151	c22	0.0291495	c32	-0.053519	c32	-0.147193	c31	-0.0849949	c31	0	1	0	0	0	0	0	0	0	0
C8orf53	0.00932206	c1	0.0389629	c1	0.0371728	c2	0.100675	c2	-0.0283325	c21	-0.0632405	c21	-0.10675	c22	-0.0782518	c22	0.0932958	c32	-0.0170806	c32	-0.132586	c31	-0.0466285	c31	0	1	0	0	0	0	0	0	0	0
C9orf40	-0.104032	c1	0.0664205	c1	0.0314637	c2	0.0352032	c2	-0.0159891	c21	-0.0289745	c21	-0.012269	c22	-0.0249832	c22	0.0926457	c32	0.0671529	c32	-0.183878	c31	-0.12111	c31	0	1	0	0	0	0	0	0	0	0
CA418524	0.269046	c1	0.189106	c1	-0.0782014	c2	-0.067094	c2	-0.213928	c21	-0.173405	c21	0.0360683	c22	0.0721446	c22	-0.015006	c32	-0.0165765	c32	0.0782695	c31	0.0191065	c31	0	1	1	-21	0	0	0	1	1	1	.1.-21.0.0.0
CA430002	-0.0371706	c1	-0.0659867	c1	-0.0844006	c2	-0.0822543	c2	-0.0594201	c21	-0.0603414	c21	0.0472366	c22	0.0629285	c22	-0.0556784	c32	-0.0916923	c32	-0.0505303	c31	-0.0573375	c31	0	1	0	0	0	0	0	0	0	0
CACNA2D1	-0.240833	c1	-0.237257	c1	-0.118411	c2	-0.167412	c2	-0.101975	c21	-0.0575767	c21	-0.0902678	c22	-0.068155	c22	-0.107936	c32	-0.190674	c32	-0.313686	c31	-0.376449	c31	0	1	-1	0	0	-31	0	1	1	1	.-1.0.0.-31.0
CACYBP	0.0636119	c1	0.00931748	c1	-0.0462839	c2	-0.0563947	c2	0.0519806	c21	-0.01489	c21	-0.136758	c22	-0.146805	c22	-0.0106093	c32	-0.0530375	c32	0.000194053	c31	-0.011235	c31	0	2	0	0	0	0	0	0	0	0
CACYBP	0.182891	c1	0.168948	c1	-0.12276	c2	-0.156487	c2	-0.0422696	c21	-0.0341942	c21	-0.039676	c22	-0.00848863	c22	-0.0934688	c32	-0.161447	c32	0.13702	c31	0.0608657	c31	0	0	1	0	0	0	0		0	1
CALD1	-0.12946	c1	-0.15297	c1	-0.0696185	c2	-0.0380928	c2	-0.167938	c21	-0.151268	c21	-0.0161829	c22	-0.00568804	c22	-0.0362474	c32	-0.0153216	c32	-0.0233884	c31	-0.0626376	c31	0	1	0	-21	0	0	0	1	1	1	.0.-21.0.0.0
CALM1	0.00653935	c1	-0.0263467	c1	-0.040525	c2	-0.0121449	c2	0.00806065	c21	-0.00197197	c21	-0.054846	c22	-0.0492307	c22	0.022972	c32	-0.00999414	c32	-0.155894	c31	-0.0833949	c31	0	1	0	0	0	0	0	0	0	0
CALM2	-0.111993	c1	-0.0881902	c1	0.0230091	c2	0.0125697	c2	-0.341926	c21	-0.257386	c21	0.074858	c22	0.0702803	c22	-0.13971	c32	-0.140433	c32	0.298051	c31	0.179104	c31	0	1	0	-21	31	0	0	1	1	1	.0.-21.31.0.0
CALM3	0.0523349	c1	0.0277983	c1	0.0284621	c2	0.0167145	c2	-0.358179	c21	-0.293045	c21	-0.00794245	c22	-0.0466942	c22	0.0392518	c32	0.0042819	c32	0.139396	c31	0.0584546	c31	0	1	0	-21	0	0	0	1	1	1	.0.-21.0.0.0
CAST	0.0240884	c1	0.019276	c1	-0.0246489	c2	-0.0474777	c2	-0.1443	c21	-0.068989	c21	0.0288589	c22	0.0454295	c22	-0.0668512	c32	-0.10322	c32	-0.0111377	c31	-0.121072	c31	0	1	0	0	0	0	0	0	0	0
CAV1	-0.056902	c1	-0.0401219	c1	0.0300984	c2	0.043177	c2	-0.133572	c21	-0.038935	c21	0.121729	c22	0.104616	c22	0.193422	c32	0.159154	c32	-0.311011	c31	-0.236418	c31	0	1	0	0	0	-31	32	1	1	1	.0.0.0.-31.32
CB045860	0.0165536	c1	0.0465218	c1	9.19403e-05	c2	0.0389931	c2	-0.0947878	c21	-0.102804	c21	-0.0585097	c22	-0.0473845	c22	0.0503857	c32	0.00999323	c32	0.0156629	c31	0.0343731	c31	0	1	0	0	0	0	0	0	0	0
CB046508	0.161655	c1	0.0640654	c1	-0.150941	c2	-0.136332	c2	-0.178873	c21	-0.149644	c21	0.036908	c22	0.0240062	c22	-0.0971519	c32	-0.0479829	c32	0.116362	c31	-0.00993886	c31	0	1	0	0	0	0	0	0	0	0
CB155900	0.0606922	c1	0.0372486	c1	-0.092634	c2	-0.0737809	c2	0.012712	c21	-0.00658935	c21	-0.0146163	c22	-0.0356563	c22	0.00774807	c32	-0.0188226	c32	-0.0623268	c31	-0.067477	c31	0	1	0	0	0	0	0	0	0	0
CBWD5	-0.084358	c1	-0.0609101	c1	0.0810562	c2	0.0648936	c2	-0.0713951	c21	0.00351343	c21	0.0400832	c22	0.0177288	c22	0.00905266	c32	0.00842617	c32	-0.124843	c31	-0.0874326	c31	0	1	0	0	0	0	0	0	0	0
CBX5	0.145541	c1	0.0675835	c1	0.000337011	c2	0.0194443	c2	0.103781	c21	0.0558166	c21	0.0360376	c22	0.0708488	c22	-0.0737435	c32	-0.0752583	c32	-0.04357	c31	-0.0973282	c31	0	1	0	0	0	0	0	0	0	0
CCDC12	0.106772	c1	0.0484882	c1	-0.0315822	c2	-0.0111336	c2	-0.0940335	c21	-0.0364792	c21	0.0149975	c22	0.0280136	c22	0.0297744	c32	-0.0169197	c32	0.0173751	c31	-0.025896	c31	0	1	0	0	0	0	0	0	0	0
CCDC23	0.0363425	c1	0.0979399	c1	0.00603471	c2	0.0482187	c2	-0.0282406	c21	-0.000919879	c21	-0.0109866	c22	0.0128312	c22	0.0349164	c32	-0.0080466	c32	-0.0753455	c31	-0.0530588	c31	0	1	0	0	0	0	0	0	0	0
CCDC50	0.018088	c1	-0.0426659	c1	-0.0556148	c2	-0.0417931	c2	-0.094821	c21	-0.0259917	c21	-0.0585297	c22	-0.0341218	c22	0.0399517	c32	0.00335915	c32	-0.00541379	c31	-0.0289086	c31	0	1	0	0	0	0	0	0	0	0
CCDC72	0.0357218	c1	-0.00276917	c1	0.0206058	c2	0.0473993	c2	-0.109961	c21	0.0118483	c21	-0.0670705	c22	-0.0588726	c22	0.0256133	c32	0.0263306	c32	0.0173151	c31	-0.0792382	c31	0	1	0	0	0	0	0	0	0	0
CCDC74A	-0.0226303	c1	-0.147141	c1	-0.0698985	c2	-0.133452	c2	-0.0388415	c21	0.223628	c21	0.19051	c22	0.229297	c22	-0.0883045	c32	-0.209275	c32	-0.00815083	c31	-0.251873	c31	0	1	0	0	22	0	0	1	0	1	.0.0.22.0.0
CCT8	0.184314	c1	0.100944	c1	-0.159838	c2	-0.122846	c2	-0.00628269	c21	-0.0130676	c21	0.0225575	c22	0.018686	c22	-0.114558	c32	-0.090798	c32	0.0628772	c31	0.0385536	c31	0	1	0	0	0	0	0	0	0	0
CD164	0.0634128	c1	-0.000537718	c1	-0.0287937	c2	0.0134852	c2	-0.131249	c21	-0.0429277	c21	0.0679548	c22	0.0835305	c22	0.0596494	c32	0.0954186	c32	0.0404211	c31	0.0183681	c31	0	1	0	0	0	0	0	0	0	0
CD2AP	0.106207	c1	0.0139825	c1	-0.022387	c2	-0.0152707	c2	-0.0755159	c21	-0.0605727	c21	-0.081863	c22	-0.0470867	c22	0.0466782	c32	0.0335744	c32	0.0444668	c31	0.0041245	c31	0	1	0	0	0	0	0	0	0	0
CD519352	-0.110691	c1	-0.112017	c1	-0.035527	c2	-0.0157287	c2	-0.165731	c21	-0.146954	c21	0.057633	c22	0.0798343	c22	-0.0766649	c32	-0.134287	c32	0.00462326	c31	0.0706367	c31	0	0	0	0	0	0	0		0	0
CD63	0.0349632	c1	0.0264724	c1	0.0184281	c2	0.0290643	c2	-0.0874897	c21	-0.08682	c21	-0.0292029	c22	-0.0313346	c22	0.0219233	c32	0.00309473	c32	0.0241734	c31	0.00877013	c31	0	1	0	0	0	0	0	0	0	0
CD641745	0.0313462	c1	0.0181148	c1	6.6414e-05	c2	0.0295694	c2	-0.0945673	c21	-0.114223	c21	0.0727619	c22	0.0626131	c22	-0.0455861	c32	-0.0760827	c32	-0.0153049	c31	-0.0873762	c31	0	1	0	0	0	0	0	0	0	0
CD642856	0.0914491	c1	0.0652015	c1	-0.0466312	c2	-0.0459186	c2	-0.0612771	c21	0.0150968	c21	0.130373	c22	0.0856419	c22	-0.0534033	c32	-0.0834063	c32	0.0436317	c31	-0.039808	c31	0	0	0	0	0	0	0		0	0
CD68	0.00147393	c1	-0.00886286	c1	0.0455476	c2	0.042492	c2	-0.113189	c21	-0.0171375	c21	0.0453719	c22	0.0290898	c22	-0.0483125	c32	-0.0221073	c32	0.0176445	c31	-0.00124141	c31	0	0	0	0	0	0	0		0	0
CD692919	-0.0257583	c1	0.0102731	c1	0.0478021	c2	0.0554033	c2	-0.0168347	c21	-0.00905909	c21	-0.0760509	c22	-0.0585952	c22	0.0873006	c32	0.0531371	c32	-0.138895	c31	-0.142616	c31	0	1	0	0	0	0	0	0	0	0
CDADC1	0.173997	c1	0.0976074	c1	-0.119979	c2	-0.10557	c2	-0.0305801	c21	-0.075062	c21	-0.0521213	c22	-0.0256605	c22	-0.010622	c32	-0.0826792	c32	0.0815873	c31	0.118795	c31	0	1	0	0	0	0	0	0	0	0
CDC37	-0.0632796	c1	-0.0709305	c1	-0.0108804	c2	-0.0211253	c2	-0.00303437	c21	0.194624	c21	0.058281	c22	0.0491571	c22	-0.0197281	c32	-0.0389666	c32	-0.0602067	c31	-0.176624	c31	0	1	0	0	0	0	0	0	0	0
CDK3	-0.0194189	c1	-0.0597801	c1	0.0436002	c2	0.0441626	c2	-0.00568105	c21	0.0136776	c21	0.0397616	c22	0.0334018	c22	0.014847	c32	-0.0170741	c32	-0.0165621	c31	-0.0851026	c31	0	1	0	0	0	0	0	0	0	0
CDKN3	-0.035595	c1	0.00279301	c1	0.0593674	c2	0.0363314	c2	-0.109847	c21	-0.050457	c21	-0.0504465	c22	-0.0388861	c22	0.0451815	c32	0.0369898	c32	-0.0580614	c31	-0.0751834	c31	0	1	0	0	0	0	0	0	0	0
CGI-94	0.134565	c1	0.077758	c1	-0.0508564	c2	-0.0248448	c2	-0.0992003	c21	-0.0287877	c21	-0.0181897	c22	-0.0239697	c22	-0.034447	c32	-0.0233157	c32	0.0619111	c31	0.0252395	c31	0	0	0	0	0	0	0		0	0
CHCHD2	0.0188971	c1	0.0122375	c1	-0.021901	c2	-0.015777	c2	-0.0866608	c21	-0.0539063	c21	-0.0093237	c22	-0.00497425	c22	-0.00711914	c32	-0.0212629	c32	-0.0217594	c31	-0.0529302	c31	0	1	0	0	0	0	0	0	0	0
CHCHD8	-0.0432184	c1	-0.127669	c1	-0.0816937	c2	-0.0819331	c2	0.000338735	c21	0.080644	c21	0.0770733	c22	0.141041	c22	-0.101872	c32	-0.165858	c32	-0.147494	c31	-0.178032	c31	0	1	0	0	0	0	0	0	0	0
CHORDC1	-0.148336	c1	-0.0923739	c1	0.0568994	c2	0.0654068	c2	0.0586792	c21	0.0237724	c21	-0.116214	c22	-0.0994771	c22	0.0661145	c32	0.0273028	c32	-0.17153	c31	-0.199712	c31	0	1	0	0	0	-31	0	1	1	1	.0.0.0.-31.0
CHURC1	0.0917701	c1	0.0687051	c1	-0.0933174	c2	-0.0816277	c2	-0.0233522	c21	-0.0262722	c21	-0.0447487	c22	-0.0599206	c22	0.0374355	c32	0.0254938	c32	-0.0545958	c31	-0.0585808	c31	0	1	0	0	0	0	0	0	0	0
CICK0721Q1	0.0394763	c1	0.0223035	c1	0.00638231	c2	0.0197982	c2	-0.0524484	c21	-0.0765735	c21	-0.0171129	c22	-0.0153901	c22	0.154077	c32	0.105193	c32	-0.131828	c31	-0.117061	c31	0	0	0	0	0	0	0		0	0
CINP	0.0604813	c1	-0.0054071	c1	-0.0253568	c2	-0.0211797	c2	-0.0683639	c21	-0.0256866	c21	-0.0499942	c22	-0.0260714	c22	0.0167855	c32	0.00823101	c32	0.0324746	c31	-0.00691491	c31	0	0	0	0	0	0	0		0	0
CIP29	-0.0378708	c1	0.0763267	c1	0.0540621	c2	0.0615293	c2	-0.0458657	c21	-0.0229661	c21	0.021389	c22	-0.0227751	c22	0.108558	c32	0.0917213	c32	-0.0873903	c31	-0.0241661	c31	0	1	0	0	0	0	0	0	0	0
CIRH1A	0.123096	c1	0.0674347	c1	-0.0397813	c2	-0.0334865	c2	-0.0912729	c21	-0.0151187	c21	0.0548069	c22	0.0453037	c22	-0.0563425	c32	-0.0799458	c32	0.107353	c31	0.0303344	c31	0	1	0	0	0	0	0	0	0	0
CK126027	0.00699599	c1	0.0337804	c1	0.00629783	c2	-0.0047932	c2	-0.0969258	c21	-0.0356987	c21	-0.0378989	c22	0.00507497	c22	0.0567857	c32	0.00565099	c32	-0.0354979	c31	-0.0493137	c31	0	1	0	0	0	0	0	0	0	0
CKS2	0.0173192	c1	0.00431478	c1	-0.00335417	c2	-0.00396481	c2	0.00312022	c21	-0.0120377	c21	0.0145141	c22	0.020045	c22	-0.0118715	c32	-0.0176078	c32	-0.0508831	c31	-0.0455769	c31	0	1	0	0	0	0	0	0	0	0
CLCN3	-0.0199467	c1	-0.0971169	c1	-0.113007	c2	-0.147341	c2	-0.0146083	c21	0.0638904	c21	0.0840183	c22	0.112264	c22	-0.0291785	c32	-0.0572321	c32	-0.052628	c31	-0.122213	c31	0	1	0	0	0	0	0	0	0	0
CLIC1	0.140426	c1	0.0911652	c1	-0.0566112	c2	-0.0360674	c2	0.0708611	c21	0.0271762	c21	-0.0948705	c22	-0.0884051	c22	-0.00305009	c32	-0.0493034	c32	-0.00321196	c31	0.0178641	c31	0	1	0	0	0	0	0	0	0	0
CLIC4	0.159713	c1	0.140279	c1	-0.123768	c2	-0.112207	c2	-0.129871	c21	-0.111964	c21	0.020618	c22	0.0703741	c22	-0.0250461	c32	-0.120269	c32	0.00691013	c31	0.0673004	c31	0	1	0	0	0	0	0	0	0	0
CLINT1	0.00707417	c1	0.0382208	c1	0.0380207	c2	0.0428933	c2	-0.0760887	c21	-0.0673333	c21	-0.0450389	c22	-0.0131524	c22	0.0330203	c32	0.0095921	c32	0.0271591	c31	0.0188013	c31	0	1	0	0	0	0	0	0	0	0
CLPTM1	0.121709	c1	0.0672288	c1	-0.0420606	c2	-0.0429042	c2	-0.0035851	c21	0.0558483	c21	0.00782811	c22	0.0331505	c22	0.0495755	c32	0.00822507	c32	-0.0987595	c31	-0.137576	c31	0	1	0	0	0	0	0	0	0	0
CN267986	-0.0422069	c1	-0.110446	c1	-0.025185	c2	0.0236141	c2	0.0668338	c21	0.0598519	c21	-0.012194	c22	-0.0164807	c22	0.0254272	c32	0.0348273	c32	-0.110428	c31	-0.130645	c31	0	1	0	0	0	0	0	0	0	0
CN398253	0.00215326	c1	0.0124757	c1	-0.0151981	c2	-0.0262753	c2	0.00702987	c21	-0.00611341	c21	-0.035734	c22	-0.0235865	c22	0.0310839	c32	-0.0269641	c32	-0.0516663	c31	-0.0850083	c31	0	1	0	0	0	0	0	0	0	0
CNN3	-0.0479533	c1	-0.0833768	c1	0.00244701	c2	0.00409623	c2	-0.0516234	c21	-0.0379213	c21	-0.0183144	c22	-0.00177511	c22	-0.01498	c32	-0.0430731	c32	-0.0795554	c31	-0.154481	c31	0	1	0	0	0	0	0	0	0	0
COPS6	-0.0640729	c1	-0.0771375	c1	-0.0303681	c2	-0.00185225	c2	-0.130717	c21	-0.115922	c21	0.0366571	c22	0.0484598	c22	-0.0228912	c32	-0.0661913	c32	-0.0422418	c31	-0.000849045	c31	0	1	0	0	0	0	0	0	0	0
COPZ1	-0.125958	c1	-0.103484	c1	0.0223799	c2	0.0295257	c2	-0.0769606	c21	-0.00117907	c21	-0.0326872	c22	-0.0204101	c22	0.109501	c32	0.0719144	c32	-0.0834281	c31	-0.0761185	c31	0	1	0	0	0	0	0	0	0	0
COX17	0.127286	c1	0.0777242	c1	-0.045889	c2	-0.0344241	c2	-0.0282642	c21	-0.0149264	c21	0.0487394	c22	0.0566259	c22	-0.0479883	c32	-0.0477081	c32	-0.0471803	c31	-0.109685	c31	0	1	0	0	0	0	0	0	0	0
COX7C	0.138339	c1	0.0913141	c1	-0.0354855	c2	0.00341773	c2	0.0356789	c21	0.018351	c21	-0.0403573	c22	-0.01909	c22	0.0460782	c32	0.0128549	c32	-0.0310517	c31	-0.0445182	c31	0	2	0	0	0	0	0	0	0	0
COX7C	0.14419	c1	0.07528	c1	-0.0585126	c2	-0.0147427	c2	0.0943131	c21	0.0611957	c21	-0.0282649	c22	-0.0170453	c22	0.0253147	c32	0.00196953	c32	-0.00118063	c31	-0.0364039	c31	0	0	0	0	0	0	0		0	0
CR593740	0.0945044	c1	0.055006	c1	-0.0337687	c2	-0.0235412	c2	-0.11331	c21	-0.116546	c21	-0.106696	c22	-0.096642	c22	-0.0016112	c32	-0.0734422	c32	0.0386154	c31	0.00511202	c31	0	1	0	0	0	0	0	0	0	0
CR622562	0.00292805	c1	0.0122346	c1	0.00435719	c2	0.00627169	c2	-0.0476056	c21	-0.0401056	c21	-0.00124423	c22	-0.00685157	c22	-0.0162931	c32	-0.0117368	c32	0.034756	c31	0.0239942	c31	0	0	0	0	0	0	0		0	0
CR623475	0.0674826	c1	0.0135522	c1	-0.0202342	c2	-0.0233117	c2	5.73762e-05	c21	-0.0257328	c21	-0.11124	c22	-0.0837496	c22	0.075847	c32	0.0280319	c32	-0.0965457	c31	-0.0408018	c31	0	1	0	0	0	0	0	0	0	0
CR627148	-0.151247	c1	-0.130567	c1	0.0132871	c2	0.0347006	c2	-0.000744241	c21	-0.0138704	c21	-0.00470705	c22	-0.00854667	c22	0.0132871	c32	0.00961487	c32	-0.137534	c31	-0.10834	c31	0	1	0	0	0	0	0	0	0	0
CR737784	0.12425	c1	0.0956268	c1	0.00283131	c2	0.000530963	c2	-0.17228	c21	-0.141829	c21	0.0129137	c22	0.00824445	c22	0.0707623	c32	0.00117728	c32	-0.0395509	c31	-0.036095	c31	0	1	0	0	0	0	0	0	0	0
CR994463	0.0685896	c1	0.0253297	c1	0.00146113	c2	0.00831617	c2	-0.11879	c21	-0.0825888	c21	0.0267004	c22	0.0336369	c22	0.0404607	c32	-0.00389278	c32	-0.0529758	c31	-0.0514299	c31	0	1	0	0	0	0	0	0	0	0
CRKL	-0.0154919	c1	-0.0273204	c1	-0.00492271	c2	0.0156061	c2	-0.00849501	c21	-0.0170416	c21	-0.0701016	c22	-0.059627	c22	0.0361912	c32	0.0207312	c32	-0.0599701	c31	-0.0328761	c31	0	1	0	0	0	0	0	0	0	0
CSDA	0.0105748	c1	0.0577792	c1	0.0342278	c2	0.0726966	c2	0.050625	c21	0.0589935	c21	0.0744162	c22	0.188095	c22	-0.122308	c32	-0.24025	c32	-0.0546431	c31	-0.1196	c31	0	1	0	0	0	0	0	0	0	0
CSNK1A1	-0.0541373	c1	-0.0269715	c1	0.06127	c2	0.0670788	c2	-0.211785	c21	-0.170155	c21	-0.0393798	c22	-0.0221691	c22	0.0993854	c32	0.0177894	c32	0.0612603	c31	0.0147645	c31	0	1	0	-21	0	0	0	1	1	1	.0.-21.0.0.0
CSTF3	0.0908302	c1	0.0344063	c1	-0.0638504	c2	-0.043877	c2	0.0601403	c21	0.0484795	c21	-0.0456144	c22	-0.0180627	c22	0.00586748	c32	0.0398809	c32	-0.0774339	c31	-0.10745	c31	0	1	0	0	0	0	0	0	0	0
DA336829	0.0984566	c1	0.12758	c1	-0.0410773	c2	-0.0246395	c2	-0.141033	c21	-0.082841	c21	-0.00477488	c22	0.0132038	c22	0.066296	c32	0.0529	c32	-0.023241	c31	0.00489886	c31	0	1	0	0	0	0	0	0	0	0
DA530747	0.0557394	c1	-0.00613124	c1	0.0101454	c2	0.0144395	c2	0.0465533	c21	0.007706	c21	-0.0274144	c22	-0.0363209	c22	-0.00107748	c32	-0.0158686	c32	-0.0798595	c31	-0.12258	c31	0	0	0	0	0	0	0		0	0
DA69782	0.112612	c1	0.0238398	c1	-0.0719063	c2	-0.0714805	c2	-0.0417034	c21	-0.0154434	c21	-0.0390908	c22	-0.00881513	c22	0.0335729	c32	-0.00228621	c32	-0.0212203	c31	-0.0809846	c31	0	0	0	0	0	0	0		0	0
DA697821	0.0956268	c1	0.0228349	c1	-0.0297297	c2	-0.0219284	c2	-0.0287575	c21	-0.0314429	c21	-0.0932677	c22	-0.0737097	c22	0.0661166	c32	0.0449038	c32	-0.00509464	c31	-0.00305803	c31	0	1	0	0	0	0	0	0	0	0
DAD1	-0.0172109	c1	-0.0486425	c1	-0.0116135	c2	0.0141298	c2	0.017179	c21	0.0203221	c21	-0.112139	c22	-0.0795486	c22	0.107752	c32	0.0735933	c32	-0.121438	c31	-0.114341	c31	0	1	0	0	0	0	0	0	0	0
DAP	0.099919	c1	0.0732425	c1	-0.092162	c2	-0.0587123	c2	-0.190615	c21	-0.141686	c21	0.0231499	c22	0.0323347	c22	-0.0915163	c32	-0.0796091	c32	0.127525	c31	0.0143461	c31	0	1	0	0	0	0	0	0	0	0
DAZAP2	0.0852566	c1	0.0436494	c1	-0.0506394	c2	-0.0322716	c2	-0.0997083	c21	-0.0584596	c21	-0.0117237	c22	-0.000768444	c22	-0.00899022	c32	-0.00487135	c32	0.0426766	c31	-0.0199226	c31	0	1	0	0	0	0	0	0	0	0
DB	0.134112	c1	0.100778	c1	-0.0513529	c2	-0.0165328	c2	-0.113217	c21	-0.0876612	c21	-0.0254666	c22	0.00494326	c22	0.00214863	c32	-0.0369068	c32	0.0981427	c31	0.0458862	c31	0	0	0	0	0	0	0		0	0
DB049861	0.0649886	c1	0.0310372	c1	0.0167672	c2	0.0304399	c2	-0.140512	c21	-0.0934378	c21	-0.0497325	c22	-0.0455458	c22	0.019594	c32	0.0256592	c32	0.0186437	c31	0.00560706	c31	0	1	0	0	0	0	0	0	0	0
DB054822	0.0698327	c1	-0.00598205	c1	-0.016105	c2	0.02108	c2	-0.0904595	c21	-0.0949329	c21	-0.0755559	c22	-0.081743	c22	0.0306288	c32	0.00519574	c32	0.047047	c31	-0.0165219	c31	0	0	0	0	0	0	0		0	0
DB186251	0.0843291	c1	0.0338505	c1	-0.0669586	c2	-0.0342897	c2	-0.1573	c21	0.0237908	c21	0.0444269	c22	0.0492194	c22	-0.0897207	c32	-0.0851011	c32	0.0474948	c31	-0.0320837	c31	0	0	0	0	0	0	0		0	0
DB331110	0.0709285	c1	0.0554969	c1	-0.0251897	c2	-0.0304188	c2	-0.060302	c21	0.0422705	c21	0.0469447	c22	0.119728	c22	-0.013077	c32	-0.103401	c32	-0.0771793	c31	-0.106786	c31	0	1	0	0	0	0	0	0	0	0
DB344099	0.0481426	c1	0.0265237	c1	-0.0826073	c2	-0.0744423	c2	-0.0596227	c21	-0.070717	c21	0.0499528	c22	0.0838483	c22	0.0289954	c32	0.00632486	c32	0.0302198	c31	0.0507422	c31	0	1	0	0	0	0	0	0	0	0
DB478885	0.330223	c1	0.19759	c1	-0.140328	c2	-0.147438	c2	-0.253253	c21	-0.139392	c21	0.0465748	c22	0.0703358	c22	-0.0715451	c32	-0.0834338	c32	0.12347	c31	0.0902792	c31	0	1	1	0	0	0	0	0	0	1	.1.0.0.0.0
DB499813	0.129415	c1	0.0376747	c1	-0.0630395	c2	-0.0492935	c2	-0.213243	c21	-0.16756	c21	0.00663624	c22	0.000439387	c22	-0.00495743	c32	0.0291126	c32	0.0614783	c31	0.0340419	c31	0	0	0	-21	0	0	0		1	0
DB514539	0.0369803	c1	0.00804855	c1	-0.0197211	c2	0.00124672	c2	-0.0956359	c21	-0.0309015	c21	0.0261384	c22	0.022664	c22	-0.0172895	c32	-0.0203485	c32	0.116371	c31	0.00333564	c31	0	1	0	0	0	0	0	0	0	0
DB522524	0.0368207	c1	-0.0256471	c1	-0.00556358	c2	0.0294142	c2	-0.12372	c21	-0.0765392	c21	0.0238907	c22	0.0296926	c22	0.0502285	c32	0.0146052	c32	0.0352764	c31	0.00842355	c31	0	1	0	0	0	0	0	0	0	0
DC347972	0.0637923	c1	0.0290865	c1	-0.0528805	c2	-0.0407226	c2	0.0326108	c21	-0.00732446	c21	-0.103426	c22	-0.0628536	c22	0.0846781	c32	0.0432068	c32	-0.122725	c31	-0.0753507	c31	0	1	0	0	0	0	0	0	0	0
DCBLD2	-0.0288978	c1	-0.028053	c1	0.0105965	c2	0.00913532	c2	-0.0803331	c21	-0.0793492	c21	-0.0207371	c22	-0.00635928	c22	0.0594709	c32	0.0490585	c32	0.00164935	c31	-0.0164189	c31	0	1	0	0	0	0	0	0	0	0
DDEF2	0.0130616	c1	0.00784761	c1	-0.0407986	c2	-0.0608788	c2	-0.0966565	c21	-0.0581399	c21	-0.0183325	c22	-0.0087844	c22	0.00530428	c32	-0.00988062	c32	-0.0221274	c31	-0.0500197	c31	0	1	0	0	0	0	0	0	0	0
DDT	0.024484	c1	0.0177392	c1	0.00321717	c2	-0.00740469	c2	-0.0864007	c21	-0.0480904	c21	0.0483792	c22	0.0275414	c22	-0.0211491	c32	0.00779063	c32	0.00140492	c31	-0.00186005	c31	0	1	0	0	0	0	0	0	0	0
DDX10	0.0599242	c1	0.0225537	c1	-0.0540111	c2	-0.0436749	c2	0.0776572	c21	0.0568667	c21	0.0062856	c22	0.0201118	c22	0.0212153	c32	-0.000164038	c32	-0.0749073	c31	-0.0940616	c31	0	1	0	0	0	0	0	0	0	0
DDX18	-0.142949	c1	-0.077126	c1	0.0940045	c2	0.0846914	c2	0.0341776	c21	0.0696128	c21	0.0358273	c22	0.0307733	c22	0.0607931	c32	0.0429707	c32	-0.0118558	c31	-0.0337652	c31	0	1	0	0	0	0	0	0	0	0
DDX43	0.052869	c1	-0.00598539	c1	-0.0094132	c2	0.0241846	c2	-0.0519635	c21	-0.00920495	c21	0.056556	c22	0.0653886	c22	0.0343917	c32	0.0117554	c32	-0.105506	c31	-0.111751	c31	0	0	0	0	0	0	0		0	0
DDX46	-0.0859469	c1	-0.0813144	c1	0.000260275	c2	0.0126435	c2	0.132442	c21	0.0933759	c21	-0.0512423	c22	-0.0372483	c22	0.0696317	c32	0.0606824	c32	-0.212423	c31	-0.223176	c31	0	1	0	0	0	-31	0	1	1	1	.0.0.0.-31.0
DDX5	0.215574	c1	0.110899	c1	-0.0709817	c2	-0.0348242	c2	-0.223816	c21	-0.0545572	c21	0.085287	c22	0.0389784	c22	-0.0878507	c32	-0.067636	c32	0.141199	c31	0.0310666	c31	0	1	0	0	0	0	0	0	0	0
DEK	0.33518	c1	0.214728	c1	-0.0915322	c2	-0.0599023	c2	0.0726227	c21	-0.00487496	c21	0.0473973	c22	0.0610936	c22	-0.0936112	c32	-0.114902	c32	0.132614	c31	0.0474395	c31	0	1	1	0	0	0	0	0	0	1	.1.0.0.0.0
DHX15	-0.0989845	c1	-0.074413	c1	0.0149065	c2	0.0830509	c2	-0.199598	c21	-0.0837707	c21	-0.032651	c22	-0.0139284	c22	0.0197295	c32	-0.0413295	c32	0.119941	c31	0.0304318	c31	0	1	0	0	0	0	0	0	0	0
DHX16	0.155548	c1	0.054085	c1	-0.0172176	c2	-0.0112625	c2	-0.21158	c21	-0.0908733	c21	0.0742794	c22	0.0725271	c22	0.0823498	c32	0.0359711	c32	-0.0234611	c31	-0.0615169	c31	0	1	0	0	0	0	0	0	0	0
DKKL1	0.130133	c1	0.109101	c1	-0.049123	c2	-0.0292048	c2	-0.187234	c21	-0.0956184	c21	0.0607967	c22	0.105035	c22	0.00539388	c32	-0.0229788	c32	0.0938748	c31	0.041959	c31	1	1	0	0	0	0	0	0	0	0
DLGAP1	0.0742781	c1	0.0290015	c1	-0.0255576	c2	-0.00776715	c2	-0.0734551	c21	-0.0684126	c21	-0.0923014	c22	-0.0688128	c22	-0.0110495	c32	0.00299695	c32	0.0538879	c31	0.00865788	c31	1	1	0	0	0	0	0	0	0	0
DMTF1	-0.107147	c1	-0.101653	c1	0.0275796	c2	0.0369121	c2	0.0693504	c21	0.0611689	c21	-0.0101267	c22	-0.0124083	c22	0.0328146	c32	0.0136136	c32	-0.162512	c31	-0.129275	c31	0	1	0	0	0	0	0	0	0	0
DNAJA1	-0.0365659	c1	0.0452666	c1	0.0476937	c2	0.0651101	c2	0.00848576	c21	0.104985	c21	-0.03398	c22	-0.0198685	c22	0.0426461	c32	0.0125955	c32	-0.145576	c31	-0.22009	c31	0	1	0	0	0	0	0	0	0	0
DNAjC7	0.0618464	c1	0.0401389	c1	-0.0356028	c2	-0.0393196	c2	-0.0359362	c21	-0.0446991	c21	-0.00625585	c22	0.00531857	c22	-0.0452752	c32	-0.0515256	c32	0.102265	c31	-0.0449441	c31	0	1	0	0	0	0	0	0	0	0
DNCH1	-0.0439437	c1	-0.0680191	c1	0.0268875	c2	0.00248927	c2	0.0196281	c21	0.0186537	c21	-0.0419124	c22	-0.0263756	c22	0.0544081	c32	0.0129902	c32	-0.111087	c31	-0.147726	c31	0	1	0	0	0	0	0	0	0	0
DNMT1	0.245827	c1	0.0975249	c1	-0.184656	c2	-0.146424	c2	-0.0638087	c21	0.0110034	c21	0.0663743	c22	0.079516	c22	-0.0980437	c32	-0.103718	c32	0.00583413	c31	-0.0693707	c31	0	1	0	0	0	0	0	0	0	0
DPH1	-0.00584287	c1	0.0148776	c1	0.0654732	c2	0.0512126	c2	-0.0344648	c21	-0.0498732	c21	0.0565074	c22	0.0466847	c22	0.000569609	c32	-0.00995648	c32	-0.0235216	c31	-0.0248492	c31	0	1	0	0	0	0	0	0	0	0
DUSP18	0.160053	c1	0.191804	c1	-0.0619167	c2	-0.0325182	c2	-0.119094	c21	-0.110865	c21	0.0190476	c22	0.0179409	c22	0.0167178	c32	-0.000698883	c32	0.112599	c31	0.191144	c31	0	0	1	0	0	0	0		0	1
DYNC1H1	-0.00827481	c1	0.0150266	c1	0.0272583	c2	0.0213755	c2	0.0303925	c21	0.0558512	c21	-0.024765	c22	-0.0145501	c22	-0.00752978	c32	-0.0145126	c32	-0.0408182	c31	-0.07413	c31	0	1	0	0	0	0	0	0	0	0
DYNLRB1	-0.0183688	c1	0.00597436	c1	-0.0354075	c2	-0.0248146	c2	0.0145366	c21	0.0569364	c21	0.04039	c22	0.0417147	c22	-0.0446168	c32	-0.0496551	c32	-0.100732	c31	-0.124359	c31	0	1	0	0	0	0	0	0	0	0
EED	0.0898354	c1	0.109806	c1	-0.00278686	c2	0.0197089	c2	-0.0233282	c21	0.0402846	c21	0.0375616	c22	0.0512738	c22	0.0440731	c32	-0.00288004	c32	-0.0671814	c31	-0.0796511	c31	0	1	0	0	0	0	0	0	0	0
EEF1A1	0.162501	c1	0.123326	c1	-0.0706316	c2	-0.0427131	c2	-0.0849458	c21	-0.0919591	c21	0.00589759	c22	0.0133923	c22	-0.0866199	c32	-0.113122	c32	0.0155757	c31	-0.0223506	c31	0	1	0	0	0	0	0	0	0	0
EEF1E1	0.0397503	c1	0.0452484	c1	0.0176823	c2	0.0518543	c2	-0.1378	c21	-0.136629	c21	-0.0470186	c22	-0.0103637	c22	0.073156	c32	0.0230359	c32	0.00528972	c31	0.107972	c31	0	1	0	0	0	0	0	0	0	0
EHFC1	-0.0593601	c1	0.0642316	c1	-0.0547008	c2	0.008527	c2	-0.0205334	c21	-0.0403818	c21	-0.0102726	c22	0.011406	c22	-0.0509086	c32	-0.0534104	c32	-0.0169644	c31	-0.0595071	c31	0	0	0	0	0	0	0		0	0
EIF1AX	-0.0232978	c1	-0.0147818	c1	0.0398989	c2	0.043993	c2	0.00524838	c21	-0.0169495	c21	-0.0716107	c22	-0.0661818	c22	0.0583925	c32	0.0304147	c32	-0.0996318	c31	-0.0863296	c31	0	1	0	0	0	0	0	0	0	0
EIF2S3	0.0355649	c1	0.00105318	c1	-0.0540758	c2	-0.0378118	c2	-0.0187224	c21	0.0142775	c21	0.0253926	c22	0.0151054	c22	-0.0311043	c32	-0.0316629	c32	-0.0587223	c31	-0.0942163	c31	0	1	0	0	0	0	0	0	0	0
EIF3S10	0.108929	c1	0.0620975	c1	-0.0986646	c2	-0.0833106	c2	-0.134639	c21	-0.129793	c21	-0.0338248	c22	-0.025503	c22	-0.0359642	c32	-0.0690183	c32	0.0807383	c31	-0.0254144	c31	0	1	0	0	0	0	0	0	0	0
EIF3S12	0.00366995	c1	0.0341938	c1	0.00962735	c2	0.00701216	c2	-0.016336	c21	-0.020556	c21	-0.0494533	c22	-0.020018	c22	-0.00675505	c32	-0.0309976	c32	0.0034909	c31	-0.0156832	c31	0	1	0	0	0	0	0	0	0	0
EIF3S13	0.169936	c1	0.108391	c1	-0.0704686	c2	-0.0814584	c2	-0.150596	c21	-0.0440999	c21	0.108912	c22	0.128788	c22	-0.127618	c32	-0.145207	c32	0.134059	c31	-0.00789634	c31	0	0	0	0	0	0	0		0	0
EIF3S14	0.0781225	c1	0.0665319	c1	-0.111461	c2	-0.130767	c2	0.0117122	c21	0.0337758	c21	-0.0704089	c22	-0.0210734	c22	-0.00942439	c32	-0.0355684	c32	-0.104332	c31	-0.037455	c31	0	0	0	0	0	0	0		0	0
EIF3S15	0.166166	c1	0.127965	c1	-0.0674746	c2	-0.042947	c2	-0.257617	c21	-0.202662	c21	0.137181	c22	0.101003	c22	-0.0507603	c32	-0.116039	c32	0.0943885	c31	0.0838959	c31	0	1	0	-21	0	0	0		1	0
EIF3SC1	-0.179248	c1	-0.104633	c1	0.0296277	c2	0.00279906	c2	0.11143	c21	0.131592	c21	0.0428891	c22	0.0576788	c22	-0.0277998	c32	-0.0564432	c32	-0.182111	c31	-0.194702	c31	0	1	0	0	0	-31	0		1	0
EIF3SH5	-0.0490925	c1	-0.0404687	c1	-0.0244062	c2	-0.0236699	c2	-0.0461721	c21	-0.0129636	c21	0.0888114	c22	0.117566	c22	-0.0481171	c32	-0.0735702	c32	-0.0774877	c31	-0.116445	c31	0	0	0	0	0	0	0		0	0
EIF4A1	0.00793216	c1	-0.0196641	c1	-0.016289	c2	-0.0199303	c2	0.0757483	c21	0.0232036	c21	-0.00698895	c22	0.0182438	c22	0.00662546	c32	0.0128911	c32	-0.0478778	c31	-0.0385018	c31	0	1	0	0	0	0	0	0	0	0
EIF4BP1	0.0504094	c1	-0.0522918	c1	-0.0233669	c2	0.0229285	c2	-0.031676	c21	-0.0240937	c21	-0.0531866	c22	-0.0516852	c22	0.0075151	c32	-0.0221358	c32	0.103609	c31	0.0448465	c31	0	0	0	0	0	0	0		0	0
EIF4E2	0.110172	c1	0.0632655	c1	-0.0663113	c2	-0.0559535	c2	-0.0090662	c21	-0.0398426	c21	0.011561	c22	-0.000272543	c22	-0.0917802	c32	-0.0971124	c32	0.125239	c31	0.0757554	c31	0	0	0	0	0	0	0		0	0
EIF4EBP1	0.133407	c1	0.116841	c1	-0.0473356	c2	-0.0303291	c2	-0.0184955	c21	-0.01184	c21	0.0223985	c22	0.016409	c22	-0.0231708	c32	-0.0267022	c32	-0.0149521	c31	-0.0309141	c31	0	1	0	0	0	0	0	0	0	0
EIF4H	-0.0109985	c1	-0.0354106	c1	0.0452133	c2	0.0448701	c2	-0.139633	c21	-0.112262	c21	-0.0901324	c22	-0.031424	c22	0.113048	c32	-0.0043536	c32	0.00986323	c31	-0.00498224	c31	0	1	0	0	0	0	0	0	0	0
EIF4R1	-0.0760635	c1	-0.0753358	c1	-0.0188259	c2	0.00924172	c2	-0.155065	c21	-0.129381	c21	0.0599059	c22	0.0513316	c22	-0.0670639	c32	-0.0748414	c32	0.00442901	c31	-0.00429938	c31	0	0	0	0	0	0	0		0	0
EIF5B	0.105219	c1	0.0497483	c1	-0.0522427	c2	-0.0224182	c2	-0.0911058	c21	-0.11716	c21	-0.110374	c22	-0.106049	c22	0.0378186	c32	-0.000831397	c32	0.036274	c31	0.055659	c31	0	2	0	0	0	0	0	0	0	0
EIF5B	0.0463227	c1	0.0454414	c1	-0.00335998	c2	0.0192614	c2	0.0372759	c21	0.0326025	c21	-0.0226064	c22	-0.0218886	c22	0.0564495	c32	0.0655059	c32	-0.0682172	c31	-0.055643	c31	0	0	0	0	0	0	0		0	0
EMP3	0.0408529	c1	0.038031	c1	0.00434094	c2	0.0261539	c2	0.0338417	c21	0.0257677	c21	-0.017609	c22	0.0111479	c22	0.0819603	c32	-0.00347586	c32	-0.108093	c31	-0.0631321	c31	0	1	0	0	0	0	0	0	0	0
ENO1	-0.00994212	c1	-0.0515335	c1	-0.0350633	c2	-0.00125433	c2	0.21278	c21	0.100794	c21	-0.183961	c22	-0.138158	c22	0.109474	c32	0.0612566	c32	-0.220703	c31	-0.11987	c31	0	1	0	0	0	0	0	0	0	0
ENSA	0.0789776	c1	0.0805054	c1	-0.0264605	c2	-0.0477638	c2	-0.00179721	c21	-0.0799845	c21	0.0145411	c22	0.00464767	c22	0.0470037	c32	-0.0274147	c32	-0.0403263	c31	-0.0134668	c31	0	1	0	0	0	0	0	0	0	0
ENY2	-0.00921742	c1	-0.0193141	c1	0.0295829	c2	0.0457342	c2	-0.15759	c21	-0.0150826	c21	-0.024329	c22	-0.03259	c22	-0.0175072	c32	-0.0259339	c32	-0.0475726	c31	-0.0673083	c31	0	0	0	0	0	0	0		0	0
ERG	-0.0601136	c1	-0.0445779	c1	0.037944	c2	0.0537479	c2	-0.0496999	c21	0.0051575	c21	0.0209025	c22	0.0788425	c22	-0.0670126	c32	-0.119752	c32	-0.0796489	c31	-0.0655323	c31	0	0	0	0	0	0	0		0	0
ERH	-0.166359	c1	-0.0856905	c1	0.0310066	c2	0.0138308	c2	-0.0598312	c21	-0.0918677	c21	-0.04205	c22	-0.054741	c22	0.0994128	c32	0.0719876	c32	-0.214455	c31	-0.173693	c31	0	1	0	0	0	-31	0	1	1	1	.0.0.0.-31.0
FABP5	0.0830061	c1	0.0313608	c1	-0.0230707	c2	-0.0153972	c2	-0.141425	c21	-0.137933	c21	-0.0560034	c22	-0.0537259	c22	-0.020706	c32	-0.010933	c32	0.0934005	c31	0.0131445	c31	0	1	0	0	0	0	0	0	0	0
FADD	-0.00810687	c1	0.0432668	c1	0.0236704	c2	0.0250043	c2	0.0383322	c21	0.0794573	c21	-0.00779348	c22	0.0542734	c22	0.0723801	c32	0.041493	c32	-0.0821033	c31	-0.0790396	c31	0	0	0	0	0	0	0		0	0
FAM128A	0.109863	c1	0.116	c1	-0.0364463	c2	-0.0152191	c2	-0.0479465	c21	-0.0306896	c21	0.0505974	c22	0.0647336	c22	-0.0771184	c32	-0.118695	c32	0.0585506	c31	0.0196211	c31	1	1	0	0	0	0	0	0	0	0
FAM44A	0.0475308	c1	0.0499742	c1	-0.0158554	c2	0.0100637	c2	-0.0547376	c21	-0.0388522	c21	0.0314191	c22	0.0248881	c22	-0.0334761	c32	-0.0479811	c32	0.000473547	c31	-0.0590544	c31	0	1	0	0	0	0	0	0	0	0
FAM86A	-0.0425265	c1	-0.00978219	c1	0.0674804	c2	0.0965844	c2	-0.0551979	c21	-0.0271596	c21	-0.0336903	c22	-0.0211071	c22	0.0344488	c32	0.00587456	c32	-0.0689824	c31	-0.0977554	c31	0	1	0	0	0	0	0	0	0	0
FAU	0.167976	c1	0.158551	c1	-0.111094	c2	-0.10117	c2	0.0392238	c21	0.00964768	c21	0.0152387	c22	0.0249873	c22	0.0237346	c32	0.0055183	c32	-0.056599	c31	-0.035739	c31	0	1	1	0	0	0	0	0	0	1	.1.0.0.0.0
FBXO9	-0.052438	c1	-0.023332	c1	0.0346977	c2	0.0182333	c2	-0.0778046	c21	-0.0676518	c21	-0.0995442	c22	-0.060765	c22	0.102756	c32	0.0204064	c32	-0.050924	c31	0.0179586	c31	1	1	0	0	0	0	0	0	0	0
FER1L3	0.0250558	c1	-0.00442149	c1	0.0378794	c2	0.0340369	c2	-0.0910871	c21	-0.0115283	c21	0.0236422	c22	0.0217636	c22	0.119262	c32	0.123675	c32	0.0440556	c31	0.0506752	c31	0	1	0	0	0	0	0	0	0	0
FEZ2	0.0719745	c1	0.0530218	c1	-0.0281917	c2	-0.0329894	c2	-0.123341	c21	-0.0588847	c21	0.0236072	c22	0.0731665	c22	0.0360405	c32	-0.0524987	c32	0.00803485	c31	0.00680548	c31	1	1	0	0	0	0	0	0	0	0
FIGN	0.032979	c1	0.0172863	c1	0.0182612	c2	0.0211639	c2	0.0187527	c21	0.0133357	c21	-0.101262	c22	-0.0888147	c22	0.0228622	c32	-0.0109838	c32	-0.150473	c31	-0.159881	c31	1	1	0	0	0	-31	0	1	1	1	.0.0.0.-31.0
FLAD1	0.182157	c1	0.129565	c1	-0.0838233	c2	-0.0645346	c2	-0.0574149	c21	-0.0307533	c21	0.0181007	c22	0.0399245	c22	0.0159254	c32	-0.036802	c32	-0.0891436	c31	-0.10833	c31	0	1	0	0	0	0	0	0	0	0
FLJ10292	0.0136465	c1	0.0156935	c1	-0.025339	c2	-0.0132133	c2	-0.0116404	c21	0.0214436	c21	-0.00237042	c22	-0.00705765	c22	-0.00460959	c32	0.00670954	c32	-0.0310549	c31	-0.0747567	c31	0	0	0	0	0	0	0		0	0
FLJ10986	0.0735846	c1	0.0572138	c1	0.00998714	c2	0.0101362	c2	-0.179075	c21	-0.0672652	c21	0.0317511	c22	0.0193867	c22	-0.0597294	c32	-0.045018	c32	0.147178	c31	0.0551957	c31	0	1	0	0	0	0	0	0	0	0
FLJ14346	-0.124468	c1	-0.100965	c1	-0.0689634	c2	-0.0504614	c2	-0.0649975	c21	0.11395	c21	0.0636215	c22	0.103029	c22	-0.0699137	c32	-0.134145	c32	-0.0503883	c31	-0.247222	c31	0	0	0	0	0	0	0		0	0
FLJ20105	0.029815	c1	-0.0134944	c1	-0.0205306	c2	0.0123924	c2	-0.076149	c21	-0.0841377	c21	-0.0555833	c22	-0.0291236	c22	0.0354912	c32	0.0167941	c32	-0.0506903	c31	-0.0513473	c31	0	1	0	0	0	0	0	0	0	0
FLJ20674	0.125134	c1	0.116247	c1	-0.00368491	c2	0.063785	c2	-0.150199	c21	-0.0172848	c21	0.0242854	c22	0.0248948	c22	-0.0336895	c32	-0.0485366	c32	-0.00967356	c31	-0.0602555	c31	0	1	0	0	0	0	0	0	0	0
FLJ31951	0.134289	c1	0.10425	c1	-0.0692489	c2	-0.0724642	c2	-0.149421	c21	-0.138784	c21	-0.0727745	c22	-0.0349813	c22	0.0043475	c32	-0.0353174	c32	0.0217041	c31	-0.00356716	c31	0	1	0	0	0	0	0	0	0	0
FLNB	0.0193405	c1	0.0518775	c1	0.0349271	c2	0.0537225	c2	-0.133224	c21	-0.0365394	c21	-0.00483824	c22	-0.00389826	c22	-0.0258084	c32	-0.0145438	c32	0.0200715	c31	-0.0174787	c31	0	1	0	0	0	0	0	0	0	0
FNBP1	-0.0175384	c1	0.0911818	c1	-0.0431157	c2	-0.0552587	c2	0.106367	c21	0.145869	c21	-0.0269178	c22	-0.0296722	c22	0.000108056	c32	-0.015741	c32	-0.128228	c31	-0.0827701	c31	0	1	0	0	0	0	0	0	0	0
FOSL1	0.133902	c1	0.116662	c1	-0.0439129	c2	-0.0301296	c2	-0.137693	c21	-0.114713	c21	-0.135096	c22	-0.124281	c22	0.0350692	c32	0.00940426	c32	0.0486722	c31	0.00738598	c31	0	1	0	0	0	0	0	0	0	0
FSCN1	0.0788042	c1	0.0450179	c1	-0.00922897	c2	0.024864	c2	-0.0572074	c21	-0.0557561	c21	-0.0700227	c22	-0.0450732	c22	0.0532131	c32	0.0368513	c32	0.0531377	c31	0.0377753	c31	0	1	0	0	0	0	0	0	0	0
FUBP1	0.0133385	c1	0.00801733	c1	-0.11933	c2	-0.142208	c2	-0.0902874	c21	-0.0823546	c21	-0.124349	c22	-0.107059	c22	0.0432222	c32	0.0163973	c32	-0.0439515	c31	-0.0413491	c31	0	1	0	0	0	0	0	0	0	0
FXYD5	0.0250501	c1	0.0030709	c1	-0.0374398	c2	-0.0238789	c2	-0.0165219	c21	-0.0474462	c21	-0.0666534	c22	-0.0359644	c22	0.0639243	c32	0.0354175	c32	-0.0525517	c31	0.000869007	c31	0	1	0	0	0	0	0	0	0	0
FYTTD1	-0.0382479	c1	-0.0338615	c1	0.00957684	c2	0.0207763	c2	-0.0619082	c21	-0.0885858	c21	-0.0461138	c22	-0.0741676	c22	0.0179801	c32	0.0277572	c32	0.0066182	c31	0.0577079	c31	0	0	0	0	0	0	0		0	0
GABARAP	0.188484	c1	0.103052	c1	-0.0785518	c2	-0.0454362	c2	-0.203969	c21	-0.181785	c21	-0.0179613	c22	-0.0117708	c22	-0.024155	c32	-0.0176637	c32	0.175883	c31	0.166256	c31	0	1	0	-21	31	0	0		1	0
GADD45GIP1	0.0565618	c1	0.0882181	c1	-0.0212722	c2	-0.0123003	c2	-0.0748806	c21	-0.082434	c21	-0.0636369	c22	-0.0551353	c22	0.0237717	c32	0.00908078	c32	0.0187622	c31	-0.00684228	c31	0	0	0	0	0	0	0		0	0
GALNT2	0.251366	c1	0.178098	c1	-0.0907476	c2	-0.105967	c2	-0.0588053	c21	-0.0343696	c21	0.065336	c22	0.113212	c22	-0.104156	c32	-0.120118	c32	0.24913	c31	0.122421	c31	0	1	1	0	0	0	0	0	0	1	.1.0.0.0.0
GAP43	0.0396146	c1	-0.0610246	c1	0.0242755	c2	0.0549934	c2	0.0133472	c21	-0.0133349	c21	0.0852029	c22	0.056685	c22	-0.0249491	c32	-0.0504028	c32	-0.0954856	c31	-0.0258992	c31	0	1	0	0	0	0	0	0	0	0
GAPDH	0.09	c1	0.11	c1	0.02	c2	0.02	c2	-0.06	c21	-0.07	c21	0.02	c22	0.02	c22	0.02	c32	0.03	c32	0.02	c31	0.07	c31	0	1	1	21	-22	0	0	1	1	1		based on the 21/6/12 movie
GCHFR	-0.000467992	c1	-0.0134105	c1	-0.0205569	c2	-0.0348928	c2	-0.0418404	c21	-0.0426875	c21	-0.00692817	c22	-0.00478375	c22	0.0191336	c32	-0.00775853	c32	-0.0638341	c31	-0.0851593	c31	0	0	0	0	0	0	0		0	0
GLO1	-0.0255333	c1	-0.0305974	c1	0.0320812	c2	0.0393137	c2	-0.0823371	c21	-0.0781918	c21	0.00129848	c22	0.0193314	c22	-0.0463683	c32	-0.101938	c32	0.0181549	c31	0.00506951	c31	0	1	0	0	0	0	0	0	0	0
GLRX	0.0034002	c1	0.0263495	c1	-0.0207378	c2	0.00641353	c2	-0.100863	c21	-0.0897233	c21	-0.0297933	c22	-0.0291922	c22	-0.0189357	c32	-0.0261696	c32	-0.0411293	c31	-0.0850722	c31	0	1	0	0	0	0	0	0	0	0
GNB2L1	0.153801	c1	0.0769572	c1	-0.0800153	c2	-0.0669124	c2	0.30537	c21	0.158869	c21	-0.303061	c22	-0.271843	c22	-0.047975	c32	-0.113945	c32	0.0886129	c31	0.085474	c31	0	1	0	21	-22	0	0	1	1	1	.0.21.-22.0.0
GNG11	0.0142157	c1	0.0343624	c1	0.0426272	c2	0.0419767	c2	-0.112905	c21	-0.0885929	c21	0.0526038	c22	0.0491221	c22	0.0303492	c32	-0.00906283	c32	-0.0169886	c31	0.0136174	c31	0	1	0	0	0	0	0	0	0	0
GRPEL1	0.0559878	c1	0.0351519	c1	-0.0247428	c2	0.00152081	c2	-0.016688	c21	0.0284261	c21	-0.0478234	c22	-0.0245406	c22	-0.0216679	c32	-0.0531783	c32	-0.00909054	c31	-0.0711832	c31	0	0	0	0	0	0	0		0	0
GSPT1	-0.0226582	c1	-0.0450639	c1	-0.0476159	c2	-0.039935	c2	-0.0696167	c21	-0.104695	c21	-0.127558	c22	-0.129303	c22	0.098908	c32	0.0907483	c32	-0.0160683	c31	-0.0213645	c31	0	1	0	0	0	0	0	0	0	0
GTF2F2	0.247306	c1	0.0958132	c1	-0.0471836	c2	0.00413566	c2	-0.325408	c21	-0.23816	c21	0.090845	c22	0.0433649	c22	-0.0698729	c32	-0.033078	c32	0.298778	c31	0.222396	c31	0	1	0	-21	31	0	0	1	1	1	.0.-21.31.0.0
HAT1	-0.114282	c1	-0.115738	c1	0.00681592	c2	-0.00234169	c2	-0.125551	c21	-0.0957243	c21	0.0190985	c22	0.0561878	c22	0.0377025	c32	-0.0878069	c32	-0.137259	c31	-0.0717427	c31	0	1	0	0	0	0	0	0	0	0
HCST	-0.103693	c1	-0.110362	c1	-0.123415	c2	-0.103847	c2	0.00301798	c21	-0.056221	c21	0.0464158	c22	0.027592	c22	-0.132021	c32	-0.144893	c32	-0.167615	c31	-0.274301	c31	0	1	0	0	0	-31	0	1	1	1	.0.0.0.-31.0
HDAC2	0.0435221	c1	-0.0087916	c1	-0.0449824	c2	-0.0228588	c2	0.0241512	c21	-0.00178675	c21	-0.0521327	c22	-0.00668274	c22	-0.0316358	c32	-0.0578098	c32	-0.0149222	c31	-0.00301938	c31	0	1	0	0	0	0	0	0	0	0
HDGF	0.0155716	c1	-0.0130723	c1	-0.00287267	c2	-0.00965923	c2	-0.0268728	c21	-0.00104225	c21	0.0218868	c22	0.0255641	c22	-0.0106026	c32	-0.0615151	c32	-0.00899878	c31	-0.0885753	c31	1	1	0	0	0	0	0	0	0	0
HIST1H2BH	0.0575427	c1	0.0281187	c1	-0.0391575	c2	-0.0314894	c2	-0.0272472	c21	-0.041184	c21	-0.00742419	c22	0.00128281	c22	0.0628614	c32	0.0429042	c32	-0.0346764	c31	-0.00844429	c31	0	0	0	0	0	0	0		0	0
HMG2L1	0.101207	c1	0.0832292	c1	-0.0486789	c2	-0.0511583	c2	-0.0245635	c21	-0.0265539	c21	0.0120552	c22	0.0443988	c22	0.0887533	c32	0.0675793	c32	-0.062404	c31	-0.0371602	c31	0	1	0	0	0	0	0	0	0	0
HMGA2	-0.0554859	c1	-0.0745569	c1	-0.028268	c2	0.000208044	c2	-0.103513	c21	-0.00762347	c21	0.115737	c22	0.101091	c22	-0.0786716	c32	-0.112365	c32	-0.0094789	c31	-0.0464451	c31	0	1	0	0	0	0	0	0	0	0
HMGB1	0.0189668	c1	0.0373982	c1	-0.0296753	c2	-0.0274503	c2	0.0518184	c21	0.00676982	c21	0.0129108	c22	0.0048205	c22	0.0310877	c32	-0.0116311	c32	-0.000774015	c31	0.0145429	c31	0	1	0	0	0	0	0	0	0	0
HMGN1	-0.0869387	c1	-0.06888	c1	0.0508661	c2	0.0662267	c2	-0.00900266	c21	0.0120607	c21	-0.0440199	c22	-0.0362499	c22	0.034799	c32	0.0203326	c32	-0.107318	c31	-0.101355	c31	0	1	0	0	0	0	0	0	0	0
HMGN2	0.00656169	c1	-0.0298612	c1	-0.0182631	c2	0.0271431	c2	-0.110732	c21	-0.0768667	c21	0.020914	c22	0.0316206	c22	-0.0129084	c32	-0.0450799	c32	0.0296624	c31	0.0089964	c31	0	1	0	0	0	0	0	0	0	0
HMGN3	0.226433	c1	0.128503	c1	-0.153076	c2	-0.118975	c2	-0.184196	c21	-0.12602	c21	0.153	c22	0.152394	c22	-0.151963	c32	-0.162487	c32	0.176294	c31	0.0868964	c31	0	1	0	0	22	0	-32	1	0	1	.0.0.22.0.-32
HMMR	-0.315239	c1	-0.235549	c1	-0.176714	c2	-0.133709	c2	0.185986	c21	0.154576	c21	0.0846829	c22	0.0730013	c22	-0.182633	c32	-0.175092	c32	-0.411129	c31	-0.381974	c31	1	1	-1	21	0	-31	-32		1	1	.-1.21.0.-31.-32
HN1	0.0930025	c1	0.0761919	c1	0.0452537	c2	0.0674884	c2	-0.0982322	c21	-0.0368736	c21	-0.0684919	c22	-0.0446546	c22	-0.045416	c32	-0.0358641	c32	-0.0286279	c31	-0.0560018	c31	0	1	0	0	0	0	0	0	0	0
HNRPA1	0.0803598	c1	0.0271529	c1	-0.0719129	c2	-0.0539858	c2	-0.0840551	c21	0.0419894	c21	0.0884688	c22	0.073795	c22	-0.0666103	c32	-0.0634593	c32	0.0588472	c31	-0.0551695	c31	0	1	0	0	0	0	0	0	0	0
HNRPA2B1	-0.0745348	c1	-0.0623266	c1	-0.00196557	c2	-0.0301342	c2	-0.107828	c21	-0.0359785	c21	0.0736136	c22	0.0641946	c22	0.0143564	c32	-0.0567261	c32	-0.00762239	c31	-0.0331266	c31	0	1	0	0	0	0	0	0	0	0
HNRPC	0.0642836	c1	0.0299825	c1	0.00646264	c2	0.00455235	c2	-0.0279962	c21	-0.0394085	c21	-0.0473221	c22	-0.00393475	c22	0.0226747	c32	-0.065829	c32	-0.125324	c31	-0.136629	c31	0	2	0	0	0	0	0	0	0	0
HNRPC	-0.0489996	c1	-0.0575262	c1	0.00602899	c2	0.00167434	c2	0.0656042	c21	0.115194	c21	0.0180388	c22	0.0903211	c22	-0.0668646	c32	-0.122913	c32	-0.0647624	c31	-0.173805	c31	0	0	0	0	0	0	0		0	0
HNRPD	0.0600465	c1	-0.00300795	c1	-0.0153838	c2	0.00207359	c2	-0.0512126	c21	-0.00276156	c21	-0.00902744	c22	0.0255602	c22	-0.0142848	c32	-0.0556891	c32	-0.0558987	c31	-0.0823035	c31	0	1	0	0	0	0	0	0	0	0
HNRPM	0.0885786	c1	0.0677115	c1	-0.0781015	c2	-0.0619418	c2	0.00876788	c21	-0.00511755	c21	0.0166223	c22	0.0126609	c22	-0.0167364	c32	-0.0353141	c32	0.0121897	c31	-0.0261333	c31	0	1	0	0	0	0	0	0	0	0
HSP90AA1	-0.0966345	c1	-0.0785644	c1	0.0263576	c2	0.0298834	c2	-0.0176258	c21	-0.0159841	c21	-0.00287066	c22	0.0010897	c22	0.0606283	c32	0.019325	c32	-0.142739	c31	-0.0426462	c31	0	1	0	0	0	0	0	0	0	0
HSP90AB1	-0.00278036	c1	-0.0225061	c1	-0.0160037	c2	-0.0174717	c2	-0.114555	c21	-0.0922993	c21	-0.0656359	c22	-0.0505955	c22	0.0201366	c32	-0.0269865	c32	-0.0573718	c31	-0.100869	c31	0	1	0	0	0	0	0	0	0	0
HSPB1	0.15813	c1	0.217387	c1	-0.010701	c2	0.000290029	c2	0.163063	c21	0.0900007	c21	0.0239542	c22	0.0596352	c22	0.0094619	c32	-0.0440544	c32	0.21076	c31	0.0416765	c31	1	1	1	0	0	0	0	0	0	1	.1.0.0.0.0
HSPCA	0.00567853	c1	-0.037157	c1	-0.00710454	c2	0.00513116	c2	-0.0469401	c21	-0.0615642	c21	-0.0535554	c22	-0.0586703	c22	0.0357709	c32	-0.00183146	c32	-0.0186589	c31	-0.0146458	c31	0	1	0	0	0	0	0	0	0	0
HYPA	0.088155	c1	0.0537874	c1	-0.0628761	c2	-0.0505104	c2	-0.0781306	c21	0.0338189	c21	0.115295	c22	0.0935156	c22	-0.0284305	c32	-0.059703	c32	0.0133787	c31	-0.0308863	c31	0	1	0	0	0	0	0	0	0	0
IFITM2	0.0270679	c1	-0.0301483	c1	-0.0572727	c2	-0.0606185	c2	-0.0411301	c21	-0.0182144	c21	0.101446	c22	0.0224991	c22	-0.0295222	c32	-0.0575293	c32	0.0230241	c31	-0.00897762	c31	0	0	0	0	0	0	0		0	0
IFT20	-0.0757567	c1	-0.0571411	c1	0.0232526	c2	0.00446563	c2	-0.171695	c21	-0.163568	c21	0.074644	c22	0.0668582	c22	0.0133225	c32	-0.0118744	c32	-0.00550784	c31	0.0155309	c31	0	1	0	-21	0	0	0	1	1	1	.0.-21.0.0.0
IL3RA	-0.0352805	c1	-0.0793198	c1	-0.0354851	c2	-0.0257276	c2	-0.0893858	c21	-0.0453063	c21	-0.0592099	c22	-0.0337746	c22	0.050231	c32	0.0031613	c32	-0.0239118	c31	-0.0731406	c31	0	1	0	0	0	0	0	0	0	0
ILF2	0.102038	c1	0.0913972	c1	0.00211121	c2	-0.0100127	c2	0.119929	c21	0.027671	c21	-0.01229	c22	0.0103889	c22	0.0169799	c32	-0.00654845	c32	-0.22328	c31	-0.130323	c31	0	1	0	0	0	0	0	0	0	0
INPP4B	-0.0002645	c1	0.0455107	c1	0.0704387	c2	0.0417136	c2	-0.108893	c21	-0.0523279	c21	0.0323355	c22	0.0262547	c22	-0.00384973	c32	-0.0139513	c32	0.0353019	c31	-0.06366	c31	0	1	0	0	0	0	0	0	0	0
IPMK	0.085538	c1	0.0438422	c1	-0.0743585	c2	-0.053121	c2	-0.0764217	c21	-0.0733983	c21	-0.0568941	c22	-0.0339359	c22	0.0646296	c32	0.0288437	c32	-0.00488206	c31	-0.0065083	c31	0	0	0	0	0	0	0		0	0
IQCK	0.0397016	c1	0.0734719	c1	-0.0022024	c2	0.00655347	c2	-0.0603697	c21	-0.0155725	c21	0.0993366	c22	0.193884	c22	0.0457761	c32	0.00909086	c32	0.0353431	c31	0.00154364	c31	0	1	0	0	0	0	0	0	0	0
ISOC1	-0.103394	c1	-0.117697	c1	0.0301755	c2	0.0488363	c2	-0.00721211	c21	-0.00132633	c21	-0.0398422	c22	-0.0333702	c22	0.0596097	c32	-0.000272428	c32	-0.207982	c31	-0.198635	c31	0	1	0	0	0	-31	0	1	1	1	.0.0.0.-31.0
JAGN1	0.0283054	c1	0.0120324	c1	0.0227246	c2	0.0591457	c2	-0.0454527	c21	-0.00386704	c21	-0.00055878	c22	0.000774921	c22	-0.00227823	c32	-0.00379885	c32	-0.0395141	c31	-0.0215721	c31	0	1	0	0	0	0	0	0	0	0
K-ALPHA-1	0.0288786	c1	0.0164157	c1	-0.0220293	c2	0.00363208	c2	-0.138546	c21	-0.0409048	c21	0.0145578	c22	-0.00948382	c22	-0.0469048	c32	-0.0757129	c32	0.0653917	c31	0.0221367	c31	0	0	0	0	0	0	0		0	0
KATNA1	-0.00185737	c1	-0.0354774	c1	-0.0235644	c2	-0.00096283	c2	-0.111224	c21	-0.107104	c21	-0.0491445	c22	-0.0445505	c22	0.0720165	c32	0.0833771	c32	-0.0178215	c31	-6.97617e-05	c31	0	1	0	0	0	0	0	0	0	0
KIAA0355	0.0129092	c1	-0.00714883	c1	0.0972535	c2	0.0692768	c2	-0.0935532	c21	-0.0530471	c21	-0.0631792	c22	-0.0419576	c22	0.0965263	c32	0.0406523	c32	-0.0806766	c31	-0.0692835	c31	0	1	0	0	0	0	0	0	0	0
KIAA0802	0.179115	c1	0.105231	c1	-0.0920508	c2	-0.0798977	c2	-0.0727204	c21	-0.0554337	c21	-0.0105201	c22	-0.0203661	c22	-0.0185757	c32	-0.0720293	c32	0.0519992	c31	-0.00831942	c31	0	1	0	0	0	0	0	0	0	0
KIAA1064	-0.0160493	c1	-0.0518236	c1	0.00106292	c2	0.00956406	c2	0.00346962	c21	0.114724	c21	0.050562	c22	0.00844892	c22	0.0525152	c32	0.0229682	c32	-0.0352018	c31	-0.0718243	c31	0	1	0	0	0	0	0	0	0	0
KIAA1430	0.178266	c1	0.14072	c1	-0.0782404	c2	-0.0717427	c2	-0.12563	c21	-0.00083626	c21	0.0504072	c22	0.0660544	c22	-0.0639466	c32	-0.147147	c32	0.111623	c31	-0.0672348	c31	0	1	0	0	0	0	0	0	0	0
KIF22	0.108711	c1	0.0832045	c1	-0.0692831	c2	-0.0539586	c2	0.00691793	c21	0.0238063	c21	0.0495637	c22	0.0613909	c22	-0.0638371	c32	-0.073122	c32	-0.0183758	c31	-0.0391797	c31	0	0	0	0	0	0	0		0	0
KLF3	0.0948699	c1	0.0347466	c1	-0.0304088	c2	-0.00447578	c2	-0.0945507	c21	-0.0894701	c21	-0.112466	c22	-0.10396	c22	0.0506396	c32	-0.0229182	c32	0.046306	c31	-0.0437027	c31	0	0	0	0	0	0	0		0	0
KLHL31	-0.00191131	c1	-0.0447223	c1	-0.0636907	c2	-0.0666282	c2	-0.035651	c21	0.0600071	c21	0.059979	c22	0.0862534	c22	-0.0533852	c32	-0.112481	c32	9.60107e-07	c31	-0.119471	c31	0	1	0	0	0	0	0	0	0	0
LARP1	0.129908	c1	0.0943091	c1	-0.0507197	c2	-0.0528918	c2	-0.146723	c21	-0.110285	c21	0.0227346	c22	-0.0128044	c22	-0.00851605	c32	0.0142999	c32	0.0634709	c31	0.0287027	c31	0	1	0	0	0	0	0	0	0	0
LETM2	0.0110625	c1	-0.0193925	c1	0.011278	c2	-0.00673693	c2	0.00832957	c21	0.0291315	c21	-0.0312588	c22	-0.0260472	c22	0.01957	c32	-0.0173957	c32	-0.00417625	c31	-0.0694821	c31	0	1	0	0	0	0	0	0	0	0
LGALS1	0.122822	c1	0.0503464	c1	-0.00639838	c2	0.0244042	c2	-0.122969	c21	-0.102474	c21	-0.0822858	c22	-0.0802163	c22	0.000780526	c32	-0.0220374	c32	0.0136842	c31	-0.0119653	c31	0	1	0	0	0	0	0	0	0	0
LGALS3	-0.0110979	c1	-0.00364125	c1	0.0119738	c2	0.0103526	c2	-0.00269137	c21	-0.000613007	c21	-0.0439235	c22	-0.0165243	c22	0.039988	c32	0.011661	c32	-0.0786926	c31	-0.0463757	c31	1	1	0	0	0	0	0	0	0	0
LIMA1	0.00837415	c1	0.00774268	c1	0.0196925	c2	0.0203403	c2	0.0213422	c21	-0.021271	c21	-0.0569764	c22	-0.0198137	c22	0.102944	c32	0.0431966	c32	-0.129944	c31	-0.0439821	c31	0	1	0	0	0	0	0	0	0	0
LMNA	0.0735336	c1	0.0213971	c1	-0.0895797	c2	-0.0852693	c2	-0.190905	c21	-0.106192	c21	0.0831975	c22	0.0964948	c22	-0.103042	c32	-0.125199	c32	0.0845046	c31	-0.000980464	c31	0	1	0	0	0	0	0	0	0	0
LOC283551	0.0392122	c1	0.00849348	c1	-0.0168049	c2	0.00577563	c2	-0.0107101	c21	0.0370723	c21	0.037539	c22	0.0815158	c22	-0.0161097	c32	-0.0599676	c32	-0.0291015	c31	-0.0653972	c31	0	1	0	0	0	0	0	0	0	0
LOC284184	0.0134062	c1	0.0174768	c1	0.0198232	c2	0.0214059	c2	-0.114766	c21	-0.0484838	c21	-0.0239386	c22	-0.0127613	c22	0.0272861	c32	0.00660244	c32	-0.0256626	c31	-0.000347623	c31	0	1	0	0	0	0	0	0	0	0
LOC441161	0.187298	c1	0.10111	c1	-0.0328637	c2	-0.027769	c2	-0.142678	c21	-0.101547	c21	-0.00462762	c22	0.0107302	c22	0.049557	c32	-0.000148573	c32	-0.0293382	c31	-0.0572614	c31	0	1	0	0	0	0	0	0	0	0
LONRF3	-0.0570707	c1	-0.11206	c1	-0.0959856	c2	-0.0893502	c2	-0.142891	c21	-0.0774382	c21	0.00668912	c22	0.0267633	c22	-0.116504	c32	-0.154095	c32	0.00884198	c31	-0.181173	c31	0	1	0	0	0	0	0	0	0	0
LOXL2	0.118532	c1	0.128873	c1	0.00796004	c2	0.0455414	c2	0.0348871	c21	-0.0173303	c21	0.0264925	c22	0.0798248	c22	0.0992761	c32	0.0413572	c32	-0.0617235	c31	-0.0125944	c31	0	1	0	0	0	0	0	0	0	0
LPIN2	-0.00860391	c1	0.0241534	c1	0.00597108	c2	-0.00902152	c2	-0.123777	c21	-0.0293702	c21	0.0974969	c22	0.126102	c22	-0.0323507	c32	-0.0942512	c32	-0.0506964	c31	-0.0335122	c31	0	1	0	0	0	0	0	0	0	0
LRRC59	0.13856	c1	0.132794	c1	-0.0259621	c2	-0.0306546	c2	-0.0937028	c21	-0.0384107	c21	-0.00392541	c22	-0.0321529	c22	0.0767555	c32	0.0785545	c32	-0.120848	c31	-0.102739	c31	0	1	0	0	0	0	0	0	0	0
LRRF1P1	0.0927877	c1	0.0809466	c1	-0.0175682	c2	-0.00549822	c2	-0.161198	c21	-0.129539	c21	-0.00125859	c22	0.00647981	c22	-0.0190042	c32	-0.0230191	c32	0.0731366	c31	0.032449	c31	0	0	0	0	0	0	0		0	0
LRRFIP1	0.0472443	c1	0.00952865	c1	-0.0403094	c2	-0.0151576	c2	-0.123826	c21	-0.129993	c21	-0.0326303	c22	-0.0503336	c22	0.0456024	c32	0.0469509	c32	0.0182533	c31	-0.00774371	c31	0	1	0	0	0	0	0	0	0	0
LSM3	0.0654047	c1	0.068438	c1	-0.10652	c2	-0.105661	c2	-0.0107806	c21	-0.00553237	c21	0.0300346	c22	0.0245759	c22	0.00699253	c32	-0.0092326	c32	-0.0964409	c31	-0.0676855	c31	0	1	0	0	0	0	0	0	0	0
LYAR	0.313655	c1	0.174922	c1	-0.153786	c2	-0.127067	c2	0.0331489	c21	-0.00447045	c21	-0.125782	c22	-0.128354	c22	-0.11463	c32	-0.188193	c32	0.280501	c31	0.181533	c31	0	1	1	0	31	0	0	0	0	1	.1.0.31.0.0
M62898	0.0484433	c1	0.00721132	c1	0.00614785	c2	-0.00321686	c2	-0.0979725	c21	-0.0672121	c21	-0.102171	c22	-0.10182	c22	0.0909258	c32	0.0588366	c32	0.0418899	c31	-0.0231279	c31	0	0	0	0	0	0	0		0	0
MAK3	0.0602458	c1	-0.0201985	c1	0.00404174	c2	0.0085826	c2	-0.0253466	c21	0.0220419	c21	-0.0451689	c22	-0.0168892	c22	0.0100138	c32	-0.0237338	c32	-0.11997	c31	-0.0879122	c31	1	1	0	0	0	0	0	0	0	0
MAML2	0.172151	c1	0.123414	c1	-0.122088	c2	-0.0896361	c2	0.0687378	c21	-0.0148289	c21	-0.0420868	c22	-0.0655919	c22	-0.0624869	c32	-0.100427	c32	0.0354699	c31	0.0356859	c31	0	0	0	0	0	0	0		0	0
MAP2K2	0.0774974	c1	0.00957688	c1	-0.0304522	c2	0.0202189	c2	-0.120268	c21	-0.101765	c21	-0.0343476	c22	-0.0258133	c22	0.031653	c32	0.0204485	c32	0.097764	c31	0.0438254	c31	0	1	0	0	0	0	0	0	0	0
MAPK1	-0.0467083	c1	-0.0502675	c1	0.0289267	c2	0.0494018	c2	-0.0642386	c21	-0.0207674	c21	-0.0488691	c22	-0.0395745	c22	0.0623816	c32	0.0551883	c32	-0.0280978	c31	-0.0296397	c31	0	1	0	0	0	0	0	0	0	0
MAPKAP1	0.0514866	c1	0.0500226	c1	-0.0299494	c2	-0.0246315	c2	-0.10167	c21	-0.00171226	c21	0.0678441	c22	0.0278309	c22	-0.0823624	c32	-0.0417028	c32	0.0305967	c31	-0.0245197	c31	0	1	0	0	0	0	0	0	0	0
MBNL2	-0.0202694	c1	-0.0434207	c1	-0.0241019	c2	-0.0192257	c2	-0.0925059	c21	-0.0209726	c21	0.00308077	c22	0.0423888	c22	-0.016402	c32	-0.0936513	c32	-0.0378883	c31	-0.0406503	c31	0	1	0	0	0	0	0	0	0	0
MCEE	0.0810803	c1	0.0230683	c1	-0.0380085	c2	-0.0158486	c2	-0.118609	c21	-0.0961566	c21	-0.0802629	c22	-0.0405044	c22	0.00900613	c32	0.0178075	c32	0.0596622	c31	0.0536184	c31	0	1	0	0	0	0	0	0	0	0
MDH1	-0.0957716	c1	-0.0854558	c1	0.0729747	c2	0.0484527	c2	-0.0426658	c21	0.108213	c21	0.0628954	c22	0.0333835	c22	0.0947235	c32	0.0369028	c32	-0.138811	c31	-0.141505	c31	0	1	0	0	0	0	0	0	0	0
MDTH	0.104817	c1	0.11892	c1	0.0234389	c2	0.0242523	c2	0.0488745	c21	0.1149	c21	0.00446222	c22	0.0026298	c22	0.0804945	c32	0.0335965	c32	-0.0396163	c31	-0.0461506	c31	0	0	0	0	0	0	0		0	0
MEGF6	0.154716	c1	0.0475655	c1	-0.0873384	c2	-0.0814949	c2	-0.0891313	c21	-0.0447296	c21	-0.0300452	c22	-0.000498891	c22	0.0753488	c32	-0.0129619	c32	0.0688084	c31	-0.0550442	c31	0	0	0	0	0	0	0		0	0
METAP2	-0.333264	c1	-0.219792	c1	0.101121	c2	0.103884	c2	-0.206043	c21	-0.16949	c21	-0.00842132	c22	0.0146445	c22	-0.11337	c32	-0.114294	c32	0.32421	c31	0.173351	c31	0	1	-1	-21	31	0	0	1	1	1	.-1.-21.31.0.0
METTL4	0.0423193	c1	-0.0237289	c1	-0.0861156	c2	-0.0793554	c2	0.0262244	c21	0.0430249	c21	0.0474629	c22	0.049545	c22	-0.0501122	c32	-0.0593601	c32	-0.0706489	c31	-0.102289	c31	0	0	0	0	0	0	0		0	0
MGC11257	-0.041083	c1	0.0369871	c1	-0.0228288	c2	0.019443	c2	0.00105755	c21	-0.010106	c21	0.199029	c22	0.155196	c22	-0.0715346	c32	-0.0708515	c32	-0.0945635	c31	-0.0937525	c31	0	1	0	0	22	0	0	1	0	1	.0.0.22.0.0
MGC1127	0.183389	c1	0.132429	c1	-0.108312	c2	-0.10052	c2	-0.0775357	c21	-0.0856071	c21	0.14344	c22	0.148353	c22	-0.143854	c32	-0.13813	c32	0.0670973	c31	0.0581534	c31	0	0	0	0	0	0	0		0	0
MGC17337	0.0420894	c1	0.0468371	c1	-0.00787629	c2	0.00602194	c2	-0.0889989	c21	-0.0738598	c21	-0.000475711	c22	0.0146114	c22	-0.00661582	c32	-0.0491685	c32	0.00792403	c31	0.00363454	c31	0	0	0	0	0	0	0		0	0
MGC71993	0.258243	c1	0.191953	c1	-0.0656106	c2	-0.0616375	c2	-0.050326	c21	-0.0312687	c21	-0.0235577	c22	-0.0095358	c22	-0.0359194	c32	-0.0418748	c32	0.253001	c31	0.177457	c31	0	0	1	0	31	0	0		0	1
mimitin	0.270771	c1	0.229704	c1	-0.0526006	c2	-0.0175821	c2	-0.185744	c21	-0.142306	c21	-0.0270213	c22	-0.00192102	c22	0.00721374	c32	-0.0140851	c32	0.216202	c31	0.14395	c31	0	1	1	0	0	0	0	0	0	1	.1.0.0.0.0
MISLOC	0.0884516	c1	0.079667	c1	-0.0495604	c2	-0.0545933	c2	-0.0470834	c21	-0.0474312	c21	-0.051819	c22	-0.0392032	c22	0.104976	c32	0.0883072	c32	-0.149806	c31	-0.0959972	c31	0	0	0	0	0	0	0		0	0
MKI67IP	0.0909469	c1	0.080558	c1	-0.0276792	c2	-0.00424968	c2	-0.00593154	c21	0.136576	c21	0.0148629	c22	0.0205361	c22	0.041894	c32	0.0490061	c32	0.01104	c31	0.0096086	c31	0	0	0	0	0	0	0		0	0
MLLT4	0.0182412	c1	-0.0101889	c1	-0.0251432	c2	0.00369366	c2	0.0117491	c21	0.0272018	c21	-0.0556322	c22	-0.0184885	c22	0.0952227	c32	0.0520063	c32	-0.0820436	c31	-0.0662516	c31	0	1	0	0	0	0	0	0	0	0
MMAA	0.0776133	c1	0.0820967	c1	-0.00686783	c2	0.00241403	c2	-0.0383819	c21	-0.0695935	c21	-0.0327843	c22	0.00874374	c22	0.0159855	c32	-0.0190758	c32	-0.0431624	c31	-0.0153473	c31	0	0	0	0	0	0	0		0	0
MMRP19	0.0760383	c1	0.021919	c1	-0.0488031	c2	-0.0184987	c2	-0.130852	c21	-0.0544393	c21	-0.0508706	c22	-0.0130565	c22	0.00950037	c32	-0.0269944	c32	0.0370955	c31	-0.0183213	c31	0	0	0	0	0	0	0		0	0
MRPL37	0.0696571	c1	0.0169405	c1	-0.0508562	c2	-0.0204322	c2	-0.128318	c21	-0.0354866	c21	-0.0508141	c22	-0.0157543	c22	0.00779581	c32	-0.0253447	c32	0.0330657	c31	-0.0268684	c31	0	1	0	0	0	0	0	0	0	0
MRPS18B	0.0506636	c1	0.0244412	c1	0.00299922	c2	-0.00412004	c2	0.0152124	c21	0.0150889	c21	-0.0176251	c22	0.00988489	c22	0.0475835	c32	-0.00351404	c32	-0.0918657	c31	-0.0726398	c31	0	1	0	0	0	0	0	0	0	0
MRTO4	0.0233499	c1	-0.00405043	c1	-0.0395356	c2	-0.0338925	c2	-0.123695	c21	-0.0717098	c21	-0.00388968	c22	-0.0105585	c22	0.0104184	c32	-0.0130258	c32	-0.0586139	c31	-0.0440668	c31	0	1	0	0	0	0	0	0	0	0
MSH6	0.113622	c1	0.139579	c1	0.0359128	c2	0.0226422	c2	0.101412	c21	0.0397514	c21	0.107975	c22	0.0749505	c22	-0.13935	c32	-0.114389	c32	-0.0574667	c31	-0.0487426	c31	0	1	0	0	0	0	0	0	0	0
MSN	-0.0689881	c1	-0.0316904	c1	0.045288	c2	0.0195323	c2	-0.0211097	c21	0.0769049	c21	0.0766756	c22	0.0587885	c22	0.0111536	c32	-0.0454603	c32	-0.106905	c31	-0.106539	c31	0	1	0	0	0	0	0	0	0	0
MSRA	0.0488854	c1	0.0118284	c1	-0.0302899	c2	-0.0297101	c2	-0.0862899	c21	-0.0067908	c21	0.0210404	c22	-0.00189202	c22	-0.0353068	c32	-0.00764462	c32	-0.0226634	c31	-0.0580684	c31	0	1	0	0	0	0	0	0	0	0
MTPN	0.0822597	c1	0.00139848	c1	-0.0194758	c2	0.00488556	c2	-0.19908	c21	-0.100349	c21	0.0956412	c22	0.102733	c22	-0.119942	c32	-0.10939	c32	0.1226	c31	0.0448688	c31	0	1	0	0	0	0	0	0	0	0
MYH9	0.0959337	c1	0.0729341	c1	-0.0594075	c2	-0.0561872	c2	-0.125652	c21	-0.0741656	c21	0.100164	c22	0.0845197	c22	0.0175227	c32	0.0265747	c32	0.00493499	c31	0.00116633	c31	1	1	0	0	0	0	0	0	0	0
MYLE	0.0101519	c1	-0.0454573	c1	-0.0158915	c2	0.0256966	c2	-0.168751	c21	-0.182047	c21	-0.0524809	c22	-0.0475298	c22	0.00609417	c32	-0.0138193	c32	0.0564832	c31	0.0498699	c31	1	1	0	-21	0	0	0	1	1	1	.0.-21.0.0.0
MYR8	0.0539787	c1	0.0234005	c1	-0.0196071	c2	0.0053698	c2	-0.0719911	c21	-0.0164786	c21	0.023101	c22	0.0422936	c22	0.0481362	c32	0.0449161	c32	0.0491687	c31	0.0537598	c31	0	0	0	0	0	0	0		0	0
N68399	0.051636	c1	0.00197554	c1	-0.0629415	c2	-0.0369609	c2	-0.0639952	c21	-0.0327842	c21	-0.0236737	c22	-0.00576704	c22	0.0378113	c32	-0.0249509	c32	-0.118669	c31	-0.0780966	c31	0	0	0	0	0	0	0		0	0
NACA	-0.0373898	c1	-0.0603647	c1	-0.0174259	c2	-0.00332388	c2	-0.0984467	c21	-0.103585	c21	-0.0689329	c22	-0.0623925	c22	0.0510567	c32	0.00338064	c32	-0.0388399	c31	-0.0439959	c31	0	1	0	0	0	0	0	0	0	0
NCBP2	0.020539	c1	0.0331802	c1	-0.00801121	c2	-0.00671648	c2	0.00930026	c21	0.0346678	c21	-0.0130701	c22	0.00353529	c22	0.0462026	c32	0.0259901	c32	-0.0778016	c31	-0.085832	c31	0	1	0	0	0	0	0	0	0	0
NCL	-0.0386885	c1	-0.0186288	c1	0.0325217	c2	0.0282462	c2	-0.114758	c21	-0.0311198	c21	0.179973	c22	0.0962455	c22	-0.0239452	c32	-0.04386	c32	-0.0183752	c31	-0.0050232	c31	0	1	0	0	0	0	0	0	0	0
NDUFB8	-0.0146452	c1	0.147772	c1	-0.0563313	c2	-0.00998937	c2	-0.0794503	c21	-0.0436469	c21	-0.00455511	c22	-0.000136508	c22	-0.0711143	c32	-0.0853712	c32	0.0187454	c31	-0.0627606	c31	0	1	0	0	0	0	0	0	0	0
NDUFC1	-0.0761238	c1	-0.0519703	c1	-0.00959923	c2	-0.0163271	c2	0.101708	c21	0.0811185	c21	0.0218853	c22	0.0201452	c22	-0.0153574	c32	-0.021509	c32	-0.123669	c31	-0.104138	c31	0	1	0	0	0	0	0	0	0	0
NDUFS4	-0.0316906	c1	-0.0755102	c1	-0.00248171	c2	-0.00569281	c2	0.0152779	c21	-0.0151499	c21	-0.0913248	c22	-0.0788855	c22	0.0876018	c32	0.0462842	c32	-0.0162412	c31	-0.00819461	c31	0	0	0	0	0	0	0		0	0
NEDDL	0.0795813	c1	0.032949	c1	-0.0178166	c2	-0.0159058	c2	-0.264101	c21	-0.223329	c21	-0.0228807	c22	-0.0150689	c22	-0.0212207	c32	-0.048646	c32	0.10471	c31	0.028532	c31	0	0	0	-21	0	0	0		1	0
NEXN	-0.0793808	c1	-0.0801393	c1	0.00375122	c2	0.0258459	c2	-0.031093	c21	-0.0126394	c21	-0.0443552	c22	-0.0103407	c22	0.0745784	c32	0.0539653	c32	-0.142185	c31	-0.167048	c31	0	1	0	0	0	0	0	0	0	0
NGRN	-0.129333	c1	-0.134763	c1	-0.0769015	c2	-0.0775466	c2	-0.0968266	c21	-0.0506309	c21	-0.0115061	c22	-0.00686498	c22	0.0534091	c32	0.0199332	c32	-0.0820372	c31	-0.0391066	c31	0	1	0	0	0	0	0	0	0	0
NHP2L1	-0.223722	c1	-0.152182	c1	0.0891827	c2	0.0710817	c2	-0.424128	c21	-0.190488	c21	0.229058	c22	0.191489	c22	0.16752	c32	0.100983	c32	-0.25432	c31	-0.214638	c31	0	2	-1	-21	22	-31	0	1	1	1	.-1.-21.22.-31.0
NHP2L1	0.00475107	c1	0.0123879	c1	-0.000131804	c2	0.0223269	c2	-0.0306456	c21	-0.0473748	c21	-0.0194224	c22	-0.0213396	c22	0.0561681	c32	0.0468208	c32	-0.100276	c31	-0.07519	c31	0	0	0	0	0	0	0		0	0
NM	-0.00594962	c1	0.0289393	c1	-0.0107959	c2	-0.00976948	c2	-0.0338343	c21	-0.0609244	c21	-0.0816321	c22	-0.0830523	c22	0.0721899	c32	0.0762516	c32	0.00303213	c31	0.00498666	c31	0	0	0	0	0	0	0		0	0
NME1-NME2	-0.0738781	c1	-0.0621732	c1	-0.0263253	c2	-0.0306792	c2	-0.081942	c21	-0.0798921	c21	-0.0914292	c22	-0.0938717	c22	0.00717332	c32	-0.0116475	c32	-0.0864097	c31	-0.0841598	c31	0	0	0	0	0	0	0		0	0
NME2	-0.0688332	c1	-0.0409083	c1	0.0686368	c2	0.0486714	c2	-0.0315456	c21	-0.00200213	c21	-0.0352207	c22	-0.0101212	c22	0.0849663	c32	0.0586439	c32	-0.117266	c31	-0.150312	c31	0	1	0	0	0	0	0	0	0	0
NME4	-0.00854575	c1	0.0479313	c1	-0.00196693	c2	0.0073057	c2	-0.0359078	c21	0.0129187	c21	0.0216161	c22	0.0273272	c22	-0.012137	c32	-0.0533105	c32	-0.0580551	c31	-0.104868	c31	0	1	0	0	0	0	0	0	0	0
NMT1	0.110259	c1	0.0635164	c1	-0.0187486	c2	-0.00221353	c2	0.0186277	c21	0.0413793	c21	-0.0422689	c22	-0.0253408	c22	0.0477416	c32	0.0228283	c32	-0.0308142	c31	-0.0812028	c31	0	1	0	0	0	0	0	0	0	0
NOL7	0.26122	c1	0.21675	c1	-0.103475	c2	-0.11828	c2	-0.258941	c21	-0.0759588	c21	0.102758	c22	0.0466381	c22	-0.0611962	c32	-0.0568331	c32	0.218412	c31	0.115594	c31	0	1	1	0	0	0	0	0	0	1	.1.0.0.0.0
NPAT	-0.0874649	c1	-0.110709	c1	0.0501061	c2	0.0889377	c2	-0.104136	c21	-0.00448153	c21	0.08134	c22	0.111419	c22	-0.0159492	c32	-0.0903293	c32	-0.0903515	c31	-0.0996438	c31	0	1	0	0	0	0	0	0	0	0
NPEPPS	-0.0253888	c1	-0.0501627	c1	0.0258746	c2	0.00797474	c2	-0.148613	c21	-0.0912411	c21	0.0135184	c22	0.00343552	c22	-0.0100029	c32	-0.0401896	c32	0.0175992	c31	-0.112218	c31	0	1	0	0	0	0	0	0	0	0
NPF3	0.0676958	c1	0.0520626	c1	-0.0422092	c2	-0.0516005	c2	0.00546475	c21	0.0216188	c21	0.0167993	c22	0.030057	c22	-0.0233084	c32	-0.0768601	c32	-0.0718893	c31	-0.105122	c31	0	0	0	0	0	0	0		0	0
NPM1	-0.272626	c1	-0.191296	c1	0.106189	c2	0.107524	c2	-0.0115923	c21	0.060366	c21	0.0821635	c22	0.0381788	c22	0.0502154	c32	-0.0164071	c32	-0.167812	c31	-0.122487	c31	0	1	-1	0	0	0	0	0	0	1	.-1.0.0.0.0
NPM3	0.0249575	c1	-0.0131441	c1	-0.0164915	c2	-0.0160528	c2	-0.0813432	c21	-0.0943678	c21	-0.0792138	c22	-0.0620693	c22	0.0517606	c32	0.0142154	c32	-0.0233287	c31	-0.083346	c31	0	0	0	0	0	0	0		0	0
NQO1	0.0693259	c1	-0.00404865	c1	-0.0117629	c2	0.0256371	c2	-0.0922823	c21	-0.0967221	c21	-0.0792608	c22	-0.0853742	c22	0.0371516	c32	0.0106152	c32	0.0453919	c31	-0.0182548	c31	1	1	0	0	0	0	0	0	0	0
NSEP1	0.142703	c1	0.0615622	c1	-0.0332237	c2	-0.00394827	c2	-0.126953	c21	-0.107283	c21	-0.0627151	c22	-0.0569558	c22	-0.0132707	c32	-0.0339674	c32	0.0462654	c31	-0.0409111	c31	1	1	0	0	0	0	0	0	0	0
NSMCE4A	-0.0139022	c1	0.00432218	c1	0.0252461	c2	0.0368074	c2	-0.12164	c21	-0.0752629	c21	0.0282259	c22	0.0147866	c22	-0.00650185	c32	-0.0263651	c32	-0.00421286	c31	-0.0869246	c31	0	1	0	0	0	0	0	0	0	0
NT	0.402126	c1	0.241767	c1	-0.206537	c2	-0.155991	c2	0.0507315	c21	0.0486695	c21	0.00936507	c22	-0.030553	c22	-0.197293	c32	-0.166796	c32	0.295332	c31	0.0964594	c31	0	0	1	0	0	0	-32		0	1
NTAN1	0.071257	c1	0.0716825	c1	-0.0627939	c2	-0.0295067	c2	0.0114553	c21	-0.0153061	c21	-0.00378648	c22	0.0125637	c22	0.0238985	c32	-0.00692214	c32	-0.09001	c31	-0.048715	c31	0	1	0	0	0	0	0	0	0	0
NUCKS1	0.0968914	c1	0.0400158	c1	-0.0827765	c2	-0.0585254	c2	-0.0815157	c21	-0.0750881	c21	-0.0484416	c22	-0.0152055	c22	0.0325335	c32	-0.0253586	c32	-0.0373282	c31	-0.00157731	c31	0	1	0	0	0	0	0	0	0	0
NUDCD1	0.0137669	c1	0.0134348	c1	-0.00604367	c2	-0.00320345	c2	0.0314922	c21	0.0204365	c21	-0.0808026	c22	-0.0642061	c22	0.0393392	c32	0.0334262	c32	-0.0606865	c31	-0.0503369	c31	0	0	0	0	0	0	0		0	0
NUDCD2	-0.068074	c1	-0.108775	c1	0.0144231	c2	0.0524034	c2	-0.154521	c21	-0.0418397	c21	-0.046316	c22	-0.0156882	c22	0.0945821	c32	0.0172137	c32	-0.165658	c31	-0.119147	c31	1	1	0	0	0	0	0	0	0	0
NUDT3	0.139789	c1	0.0411937	c1	-0.078437	c2	-0.0291642	c2	-0.0770192	c21	-0.0600789	c21	-0.0908854	c22	-0.0913738	c22	0.0366426	c32	0.0231572	c32	0.0629083	c31	0.00636133	c31	0	1	0	0	0	0	0	0	0	0
OBTP	0.18443	c1	0.100077	c1	-0.117986	c2	-0.104423	c2	-0.109632	c21	-0.0568724	c21	0.0607417	c22	0.0849566	c22	-0.101071	c32	-0.101271	c32	0.116364	c31	0.0867062	c31	0	0	0	0	0	0	0		0	0
PABPN1	0.129743	c1	0.0692136	c1	-0.0310719	c2	-0.0270898	c2	-0.242581	c21	-0.183109	c21	-0.0337556	c22	-0.00913913	c22	-0.00721181	c32	-0.00633293	c32	0.127364	c31	0.113749	c31	0	1	0	-21	0	0	0	1	1	1	.0.-21.0.0.0
PAGE1	0.0220493	c1	0.00994224	c1	-0.023202	c2	-0.00138477	c2	-0.114597	c21	-0.103465	c21	-0.0384367	c22	-0.0174329	c22	0.0149098	c32	-0.0112904	c32	-0.0353467	c31	-0.0232216	c31	0	1	0	0	0	0	0	0	0	0
PAK2	-0.0272732	c1	-0.029079	c1	-0.0204214	c2	-0.0183749	c2	0.0592981	c21	-0.0143212	c21	-0.0102795	c22	0.0443419	c22	0.00881624	c32	-0.0430825	c32	-0.0800664	c31	0.0114346	c31	0	1	0	0	0	0	0	0	0	0
PAWR	0.0766572	c1	0.0413932	c1	-0.0240979	c2	0.0418114	c2	0.0337951	c21	0.0488883	c21	-0.0248081	c22	-0.0309687	c22	0.0405363	c32	0.0405031	c32	-0.0602957	c31	-0.0830848	c31	0	0	0	0	0	0	0		0	0
PCBD1	-0.0232006	c1	0.0476358	c1	0.0345332	c2	0.0403476	c2	-0.135862	c21	-0.117638	c21	-0.0175861	c22	-0.0127293	c22	0.0846137	c32	0.0223608	c32	-0.0917315	c31	-0.0376304	c31	0	1	0	0	0	0	0	0	0	0
PCMTD2	0.0374832	c1	0.0164466	c1	-0.0119593	c2	-0.0100537	c2	-0.101386	c21	-0.0670838	c21	0.0170715	c22	0.00517144	c22	0.00101188	c32	-0.0240454	c32	-0.0144474	c31	-0.0521605	c31	0	1	0	0	0	0	0	0	0	0
PDCD5	0.0482362	c1	0.0103358	c1	-0.021455	c2	-0.0207781	c2	-0.0484826	c21	-0.0149975	c21	-0.00853365	c22	0.0044614	c22	0.0270799	c32	0.0109934	c32	-0.0786357	c31	-0.140416	c31	0	1	0	0	0	0	0	0	0	0
PDIA5	-0.00656471	c1	-0.0518127	c1	-0.0621313	c2	-0.046719	c2	-0.0219437	c21	-0.0533113	c21	-0.0205108	c22	-0.0111923	c22	-0.000729725	c32	-0.011985	c32	-0.0807357	c31	-0.05943	c31	0	1	0	0	0	0	0	0	0	0
PDLIM5	0.14614	c1	0.0627144	c1	-0.104923	c2	-0.130787	c2	-0.131335	c21	-0.0510447	c21	0.0803487	c22	0.109364	c22	-0.0719523	c32	-0.10498	c32	0.0546458	c31	-0.0304111	c31	0	0	0	0	0	0	0		0	0
PEPP-2	-0.165601	c1	-0.0791856	c1	0.113997	c2	0.095443	c2	0.070988	c21	0.0763514	c21	-0.0702939	c22	-0.0771765	c22	0.122589	c32	0.111828	c32	-0.256636	c31	-0.198492	c31	0	0	0	0	0	-31	0		1	0
PFDN5	0.0310875	c1	0.0340552	c1	0.0624318	c2	0.0519094	c2	-0.0504151	c21	-0.0514621	c21	-0.0344465	c22	-0.0426034	c22	0.0516589	c32	0.0413984	c32	0.00114623	c31	0.00911264	c31	0	1	0	0	0	0	0	0	0	0
PFN1	0.00527284	c1	-0.0210755	c1	-0.0292851	c2	-0.0105214	c2	-0.174479	c21	-0.164671	c21	-0.000375399	c22	0.0113809	c22	0.070363	c32	0.0508404	c32	-0.0721326	c31	-0.0763856	c31	0	1	0	-21	0	0	0	1	1	1	.0.-21.0.0.0
PFN4	-0.0436724	c1	-0.0412034	c1	-0.00874491	c2	-0.0223322	c2	-0.0388192	c21	0.143881	c21	0.195462	c22	0.146773	c22	-0.0758352	c32	-0.155578	c32	-0.156091	c31	-0.18176	c31	0	0	0	0	0	-31	0		1	0
PGK1	0.116281	c1	0.0597714	c1	0.034135	c2	0.0494317	c2	-0.166123	c21	-0.154103	c21	-0.113389	c22	-0.093898	c22	0.0933717	c32	0.0623872	c32	0.0986906	c31	0.0772792	c31	0	1	0	-21	0	0	0	1	1	1	.0.-21.0.0.0
PHB2	-0.0173724	c1	-0.0527473	c1	-0.044753	c2	-0.0396115	c2	0.0926451	c21	0.148836	c21	-0.00691552	c22	0.000510456	c22	-0.0175382	c32	-0.032467	c32	-0.122352	c31	-0.172024	c31	0	1	0	0	0	0	0	0	0	0
PHPT1	0.0777866	c1	-0.0177877	c1	-0.0483454	c2	-0.0164318	c2	-0.0868497	c21	-0.0402882	c21	0.022377	c22	0.0487606	c22	-0.0631122	c32	-0.145304	c32	0.00786815	c31	-0.0434586	c31	0	1	0	0	0	0	0	0	0	0
PIGY	-0.0828976	c1	-0.0814939	c1	-0.0079504	c2	0.0344108	c2	0.0531133	c21	0.111729	c21	0.00893523	c22	0.0223173	c22	0.0131585	c32	0.00336218	c32	-0.0989789	c31	-0.127156	c31	0	1	0	0	0	0	0	0	0	0
PIN4	0.080662	c1	0.0211101	c1	-0.0694378	c2	-0.00422075	c2	0.118079	c21	0.0171352	c21	-0.0800721	c22	-0.0468508	c22	0.0758304	c32	0.0590873	c32	-0.115714	c31	-0.0601671	c31	0	1	0	0	0	0	0	0	0	0
PLEC1	0.0609047	c1	0.0294184	c1	0.0105808	c2	0.0250437	c2	-0.0145773	c21	-0.0295274	c21	-0.106666	c22	-0.0989766	c22	0.107238	c32	0.0873025	c32	-0.0367686	c31	-0.063358	c31	0	1	0	0	0	0	0	0	0	0
PLS3	0.102803	c1	0.0505546	c1	-0.0738118	c2	-0.0460585	c2	-0.0728241	c21	-0.028448	c21	-0.0507927	c22	-0.0290598	c22	-0.0202036	c32	-0.0296451	c32	0.0171521	c31	-0.0299732	c31	0	1	0	0	0	0	0	0	0	0
PNN	0.0227539	c1	-0.044725	c1	-0.0120249	c2	0.0168972	c2	-0.0789461	c21	0.0129854	c21	0.0117423	c22	0.0383889	c22	-0.00775324	c32	-0.0387685	c32	-0.0539772	c31	-0.0904758	c31	0	1	0	0	0	0	0	0	0	0
POLR1D	0.000867413	c1	-0.0205518	c1	0.0308661	c2	0.0291271	c2	-5.69392e-05	c21	0.0304623	c21	-0.0177149	c22	-0.034331	c22	0.0390894	c32	0.0329617	c32	-0.0411924	c31	-0.0243042	c31	0	2	0	0	0	0	0	0	0	0
POLR1D	0.0986652	c1	0.177174	c1	0.0260372	c2	0.046903	c2	0.150062	c21	-0.00480666	c21	0.162336	c22	0.0972839	c22	-0.181225	c32	-0.166261	c32	-0.152924	c31	-0.128902	c31	0	0	0	0	0	0	-32		0	0
POLR2G	-0.0522575	c1	-0.0769776	c1	-0.00295749	c2	-0.00429311	c2	0.0185933	c21	0.0221268	c21	-0.107569	c22	-0.0845334	c22	0.0140905	c32	-0.0240703	c32	-0.10169	c31	-0.0533542	c31	0	1	0	0	0	0	0	0	0	0
POLR3GL	-0.0117673	c1	-0.0163497	c1	0.000266021	c2	0.0235038	c2	0.00378715	c21	0.0162842	c21	0.0346091	c22	0.0230114	c22	-0.0237089	c32	-0.0421303	c32	-0.0412423	c31	-0.0679239	c31	0	1	0	0	0	0	0	0	0	0
poly(RC)binding-protein	-0.0122971	c1	-0.0372305	c1	-0.0352086	c2	-0.0302003	c2	-0.0834888	c21	-0.041333	c21	0.000749354	c22	-0.00296651	c22	0.00990865	c32	-0.0108409	c32	-0.0128897	c31	-0.0635164	c31	0	0	0	0	0	0	0		0	0
PPFIBP1	-0.0361614	c1	-0.0580158	c1	-0.0507889	c2	-0.0524273	c2	-0.0990299	c21	-0.0471089	c21	0.0441616	c22	0.00865099	c22	-0.0607394	c32	-0.0259646	c32	-0.0119653	c31	0.0260031	c31	0	1	0	0	0	0	0	0	0	0
PPIA	0.116972	c1	0.0358769	c1	-0.0195125	c2	-0.0032951	c2	-0.112481	c21	-0.116502	c21	-0.021161	c22	0.00661144	c22	-0.00833045	c32	-0.0231027	c32	0.0832567	c31	0.119273	c31	0	2	0	0	0	0	0	0	0	0
PPIA	0.101528	c1	0.041739	c1	-0.0424276	c2	0.00728509	c2	-0.117203	c21	-0.121696	c21	-0.00485028	c22	-0.00188697	c22	0.0220945	c32	0.0150957	c32	0.0970598	c31	0.126408	c31	0	0	0	0	0	0	0		0	0
PPIAB6	-0.0665048	c1	-0.0214591	c1	-0.0171303	c2	0.00557265	c2	0.0512885	c21	0.0563282	c21	0.023474	c22	0.0463008	c22	-0.0491003	c32	-0.0966422	c32	-0.133032	c31	-0.150835	c31	0	0	0	0	0	0	0		0	0
PPIAC1	-0.00643129	c1	0.0121705	c1	0.0443888	c2	0.025657	c2	-0.0149706	c21	-0.00803887	c21	-0.0244433	c22	-0.0448206	c22	0.0633998	c32	0.0703938	c32	-0.0174487	c31	0.00563973	c31	0	0	0	0	0	0	0		0	0
PPP1R14B	0.167933	c1	0.0743581	c1	-0.0648087	c2	-0.0250193	c2	-0.165698	c21	-0.134091	c21	0.0395172	c22	0.0620178	c22	-0.0341922	c32	-0.0480445	c32	0.13469	c31	0.112123	c31	0	1	0	0	0	0	0	0	0	0
PPP1R2	0.0150069	c1	-0.00953834	c1	-0.0399966	c2	-0.0320746	c2	0.0246399	c21	0.0310246	c21	-0.00731932	c22	-0.0249567	c22	-0.0093228	c32	0.00540106	c32	-0.0801262	c31	-0.054583	c31	0	1	0	0	0	0	0	0	0	0
PRC1	0.132399	c1	0.0194416	c1	-0.0874216	c2	-0.0239088	c2	-0.104625	c21	-0.084248	c21	0.0305669	c22	0.0705285	c22	-0.0539997	c32	-0.035288	c32	0.0610715	c31	0.0193696	c31	0	1	0	0	0	0	0	0	0	0
PREPL	-0.00968033	c1	-0.0451164	c1	0.0259427	c2	0.0623461	c2	-0.145972	c21	-0.132032	c21	0.055395	c22	0.0734605	c22	0.0155198	c32	-0.0326171	c32	-0.0122231	c31	-0.0425247	c31	0	1	0	0	0	0	0	0	0	0
PRKCBP1	0.0682707	c1	0.0139033	c1	-0.00664085	c2	-0.00662882	c2	-0.141987	c21	-0.11599	c21	-0.0767913	c22	-0.0409751	c22	0.0482951	c32	-0.00657737	c32	0.0638805	c31	0.0204063	c31	1	1	0	0	0	0	0	0	0	0
PROCR	0.0727103	c1	0.108332	c1	-0.0180429	c2	0.0409288	c2	-0.0663541	c21	0.000234522	c21	0.0299154	c22	0.0288361	c22	0.0386702	c32	0.0320017	c32	-0.0633607	c31	-0.074562	c31	0	0	0	0	0	0	0		0	0
PRPF31	-0.0362798	c1	-0.0617103	c1	-0.038975	c2	-0.0519107	c2	-0.18995	c21	-0.00465147	c21	0.0504311	c22	0.0653872	c22	-0.0300143	c32	-0.0972782	c32	-0.0721299	c31	-0.0711599	c31	0	0	0	0	0	0	0		0	0
PRR13	-0.0249721	c1	-0.0266696	c1	0.00132433	c2	-0.00803962	c2	-0.0747405	c21	-0.0525975	c21	0.0429446	c22	0.0259256	c22	-0.0169794	c32	0.00647647	c32	-0.0753825	c31	-0.0523956	c31	0	0	0	0	0	0	0		0	0
PSIP1	0.0434994	c1	0.0259361	c1	-0.0729851	c2	-0.0565148	c2	0.0300215	c21	0.0227542	c21	0.0152772	c22	0.0589225	c22	0.022281	c32	-0.0472989	c32	-0.149968	c31	-0.0945987	c31	0	1	0	0	0	0	0	0	0	0
PSMA1	0.0757588	c1	0.0169967	c1	0.0169936	c2	0.0109158	c2	-0.178794	c21	-0.0870772	c21	-0.08589	c22	-0.0544335	c22	0.0944015	c32	0.029104	c32	0.0827292	c31	-0.0104256	c31	0	1	0	0	0	0	0	0	0	0
PSMA7	0.37704	c1	0.160417	c1	-0.0856093	c2	-0.0217659	c2	0.133219	c21	0.0478333	c21	-0.0729608	c22	-0.0714781	c22	-0.0312269	c32	-0.0369475	c32	0.223896	c31	0.174553	c31	0	1	1	0	31	0	0	0	0	1	.1.0.31.0.0
PSMB1	-0.0813435	c1	-0.080074	c1	0.0289	c2	0.00877963	c2	0.00742051	c21	0.0303467	c21	0.0675908	c22	-0.00472212	c22	-0.0556168	c32	-0.00377878	c32	-0.0453221	c31	-0.0634718	c31	0	1	0	0	0	0	0	0	0	0
PSMB6	0.0286684	c1	0.021034	c1	-0.0137803	c2	-0.00535562	c2	-0.0423648	c21	-0.0389381	c21	0.0370684	c22	0.037559	c22	-0.055835	c32	-0.0612805	c32	0.0415106	c31	0.00588523	c31	0	1	0	0	0	0	0	0	0	0
PSMC1	-0.00713523	c1	-0.00393513	c1	-0.0314566	c2	-0.0498959	c2	-0.133813	c21	-0.0789296	c21	-0.0166596	c22	0.0590309	c22	-0.00924435	c32	-0.111551	c32	-0.00350968	c31	0.0530299	c31	0	1	0	0	0	0	0	0	0	0
PSMC4	0.0240402	c1	0.092076	c1	0.0292651	c2	0.00576293	c2	0.0527815	c21	0.129387	c21	0.0199038	c22	0.0317323	c22	0.0652002	c32	0.016476	c32	-0.163505	c31	-0.155043	c31	0	1	0	0	0	-31	0	1	1	1	.0.0.0.-31.0
PSMD1	0.151616	c1	0.0893041	c1	-0.067717	c2	-0.0531909	c2	-0.240669	c21	-0.0286676	c21	0.0445556	c22	0.0667775	c22	-0.11711	c32	-0.135916	c32	0.183022	c31	0.0286659	c31	0	1	0	0	0	0	0	0	0	0
PSMD12	0.0520021	c1	-0.0503608	c1	-0.0236042	c2	0.0185894	c2	-0.0304967	c21	-0.024719	c21	-0.0533887	c22	-0.0508463	c22	0.0102398	c32	-0.0217233	c32	0.100348	c31	0.0445716	c31	1	1	0	0	0	0	0	0	0	0
PSMD6	0.0752943	c1	0.0122822	c1	-0.0851356	c2	-0.0535286	c2	-0.0609204	c21	-0.0619672	c21	-0.0267189	c22	-0.0136033	c22	0.0434071	c32	0.00837722	c32	-0.0375175	c31	-0.0417046	c31	1	1	0	0	0	0	0	0	0	0
PSMD8	0.0463202	c1	0.02398	c1	-0.019944	c2	-0.028267	c2	-0.0580494	c21	0.00107033	c21	0.0301106	c22	0.0340476	c22	-0.00225716	c32	-0.0401562	c32	-0.0559276	c31	-0.0753821	c31	0	1	0	0	0	0	0	0	0	0
PSME1	0.0306603	c1	0.0450837	c1	-0.0363609	c2	-0.0122204	c2	0.118803	c21	0.0723726	c21	-0.0892268	c22	-0.0590079	c22	0.0626079	c32	0.0616027	c32	-0.175277	c31	-0.103364	c31	0	1	0	0	0	0	0	0	0	0
PSMF1	0.0431414	c1	0.0173306	c1	0.0243259	c2	0.0188563	c2	-0.0347751	c21	-0.0360863	c21	-0.0180856	c22	0.00612912	c22	-0.00675766	c32	-0.0321965	c32	0.0211851	c31	-0.0231196	c31	0	1	0	0	0	0	0	0	0	0
PSPC1	0.0878331	c1	0.076596	c1	-0.0788755	c2	-0.0773728	c2	-0.1609	c21	-0.0214941	c21	0.173499	c22	0.132679	c22	-0.134875	c32	-0.16491	c32	0.0665214	c31	0.0119971	c31	0	1	0	0	0	0	0	0	0	0
PTMA	-0.0618131	c1	-0.0014359	c1	0.156511	c2	0.0987902	c2	-0.0817578	c21	0.00788042	c21	0.02023	c22	0.0364191	c22	0.00699976	c32	-0.0288884	c32	-0.178951	c31	-0.0782323	c31	0	1	0	0	0	0	0	0	0	0
PTMS	-0.0225453	c1	-0.0490903	c1	0.0142877	c2	0.0443542	c2	-0.0318742	c21	-0.0526988	c21	-0.0322404	c22	0.0137952	c22	0.0306842	c32	-0.0788368	c32	-0.0130099	c31	0.017905	c31	1	1	0	0	0	0	0	0	0	0
PTPN1	-0.039371	c1	-0.0452305	c1	0.0650945	c2	0.0636568	c2	-0.0961385	c21	-0.0303592	c21	0.039338	c22	0.0410773	c22	-0.0235723	c32	-0.0590529	c32	-0.0211056	c31	-0.123482	c31	0	1	0	0	0	0	0	0	0	0
PTPN11	0.0796201	c1	0.0608675	c1	-0.0157656	c2	0.00216531	c2	-0.0869939	c21	-0.0256796	c21	0.0663168	c22	0.121745	c22	0.0625334	c32	0.0386229	c32	-0.0142335	c31	-0.0174888	c31	0	1	0	0	0	0	0	0	0	0
PTTG1IP	0.0138328	c1	-0.020201	c1	-0.0300979	c2	-0.0178096	c2	-0.102202	c21	0.00171854	c21	0.123704	c22	0.0380631	c22	-0.0913751	c32	-0.0535727	c32	-0.00889525	c31	-0.0832088	c31	0	1	0	0	0	0	0	0	0	0
PWP1	0.00393473	c1	-0.00838242	c1	-0.0506581	c2	-0.0642483	c2	0.0263943	c21	0.0243796	c21	0.00451245	c22	-0.00524965	c22	-0.0307849	c32	-0.0220659	c32	-0.102252	c31	-0.0731752	c31	0	0	0	0	0	0	0		0	0
PXK	0.14493	c1	0.112601	c1	-0.0529838	c2	-0.0450997	c2	0.0469406	c21	0.029878	c21	-0.0171053	c22	-0.00781788	c22	-0.0404013	c32	-0.0737421	c32	-0.069895	c31	-0.130051	c31	0	1	0	0	0	0	0	0	0	0
RAB11A	-0.043933	c1	-0.146222	c1	-0.0359727	c2	-0.0270791	c2	-0.0214133	c21	0.102438	c21	0.0543914	c22	0.0513749	c22	0.00643528	c32	-0.00778529	c32	-0.0865913	c31	-0.133562	c31	0	1	0	0	0	0	0	0	0	0
RAB1A	0.0375819	c1	0.0182071	c1	0.00624754	c2	0.0350583	c2	-0.0775441	c21	-0.0421408	c21	0.0432711	c22	0.0505914	c22	0.0013566	c32	-0.0526481	c32	0.0117825	c31	-0.013042	c31	0	1	0	0	0	0	0	0	0	0
RAB33A	0.0330816	c1	0.0239593	c1	0.0176118	c2	0.0301083	c2	-0.113747	c21	-0.0944163	c21	-0.0118445	c22	0.00247016	c22	0.00932478	c32	-0.0197497	c32	-0.0584809	c31	-0.0591586	c31	0	1	0	0	0	0	0	0	0	0
RAC1	0.147194	c1	0.0181298	c1	0.0323338	c2	0.0622046	c2	-0.12754	c21	-0.130875	c21	-0.143197	c22	-0.13262	c22	0.110803	c32	0.0989848	c32	0.168161	c31	0.123298	c31	0	1	0	0	0	0	0	0	0	0
RACK1	-0.0402005	c1	-0.047689	c1	0.0266013	c2	0.03617	c2	-0.153116	c21	-0.131131	c21	-0.0372959	c22	-0.0417317	c22	0.0161209	c32	-0.00885766	c32	-0.0937997	c31	-0.177234	c31	0	0	0	0	0	0	0		0	0
RAD51AP1	0.14304	c1	0.0476214	c1	-0.0632105	c2	-0.0585749	c2	-0.0944976	c21	-0.120832	c21	-0.0904083	c22	-0.0799459	c22	-0.00385934	c32	-0.0560118	c32	0.0818812	c31	0.0435947	c31	0	0	0	0	0	0	0		0	0
RAD51L1	-0.0531481	c1	-0.0995649	c1	-0.017008	c2	-0.0220867	c2	-0.00122637	c21	-0.00944926	c21	-0.0159655	c22	-0.0106517	c22	-0.0211091	c32	-0.0540923	c32	-0.102801	c31	-0.161553	c31	0	0	0	0	0	0	0		0	0
RANBP1	-0.0781048	c1	-0.0580759	c1	0.0488224	c2	0.0363099	c2	-0.0426481	c21	-0.0350975	c21	-0.0861786	c22	-0.0823315	c22	0.0717644	c32	0.0424896	c32	-0.0879783	c31	-0.143772	c31	0	1	0	0	0	0	0	0	0	0
RASIP1	0.0132656	c1	-0.0417183	c1	-0.0453317	c2	-0.0375559	c2	-0.0615708	c21	0.00174336	c21	0.00556146	c22	-0.00921732	c22	-0.0101656	c32	-0.00380258	c32	0.0377191	c31	-0.0565103	c31	1	1	0	0	0	0	0	0	0	0
RAVER1	-0.0816182	c1	-0.0416979	c1	0.00308835	c2	-0.00361187	c2	-0.015103	c21	0.079293	c21	0.0212291	c22	0.0208613	c22	0.00994113	c32	-0.00358152	c32	-0.110073	c31	-0.123532	c31	0	1	0	0	0	0	0	0	0	0
RBM27	0.0341436	c1	0.0340149	c1	-0.0332582	c2	-0.0355073	c2	0.0245001	c21	0.038664	c21	0.0351491	c22	0.0373613	c22	-0.0320053	c32	-0.0414557	c32	-0.0937892	c31	-0.137714	c31	0	1	0	0	0	0	0	0	0	0
RBM41	0.134334	c1	0.0917344	c1	-0.0587999	c2	-0.0641802	c2	-0.138812	c21	-0.107876	c21	-0.0222804	c22	-0.0391776	c22	-0.0173504	c32	-0.0995478	c32	0.0597259	c31	0.0670427	c31	0	1	0	0	0	0	0	0	0	0
RBM8A	0.0828375	c1	0.00651357	c1	-0.0137929	c2	0.0145698	c2	-5.67889e-05	c21	-0.0128299	c21	-0.162785	c22	-0.14762	c22	0.0762456	c32	0.0397447	c32	-0.00747901	c31	-0.0357937	c31	0	1	0	0	0	0	0	0	0	0
RBX1	0.0230944	c1	-0.018675	c1	0.000910687	c2	-0.0112505	c2	-0.218055	c21	-0.213854	c21	-0.0993293	c22	-0.083587	c22	0.0847189	c32	0.0627922	c32	0.127563	c31	0.0885977	c31	0	1	0	-21	0	0	0	1	1	1	.0.-21.0.0.0
RFC1	0.0836291	c1	0.0556222	c1	-0.0118377	c2	0.000328713	c2	-0.0111507	c21	-0.00287693	c21	-0.0177088	c22	0.0099697	c22	0.0506102	c32	0.00137815	c32	-0.114347	c31	-0.103882	c31	0	1	0	0	0	0	0	0	0	0
RGS10	-0.04233	c1	-0.0744661	c1	-0.0318377	c2	-0.0158923	c2	-0.0486472	c21	0.0176171	c21	0.0196353	c22	0.0357263	c22	-0.0373849	c32	-0.0594281	c32	-0.01077	c31	-0.067565	c31	0	1	0	0	0	0	0	0	0	0
RHD	0.0400376	c1	0.00290529	c1	-0.0224597	c2	0.00194466	c2	-0.195763	c21	-0.164661	c21	-0.0635211	c22	-0.0557998	c22	0.0414658	c32	0.0264328	c32	0.08106	c31	0.0385887	c31	0	1	0	-21	0	0	0	1	1	1	.0.-21.0.0.0
RPA2	0.200562	c1	0.114871	c1	0.0564163	c2	0.0383609	c2	-0.220444	c21	-0.180848	c21	-0.00224803	c22	-0.000879919	c22	0.145554	c32	0.114952	c32	0.074648	c31	0.0513638	c31	0	1	0	-21	0	0	0	1	1	1	.0.-21.0.0.0
RPAP3	-0.0143762	c1	0.0214359	c1	0.00233756	c2	0.00124493	c2	-0.16135	c21	-0.069853	c21	0.0832669	c22	0.0684848	c22	0.0087354	c32	-0.000730904	c32	0.132798	c31	0.123146	c31	0	1	0	0	0	0	0	0	0	0
RPL11	0.0779157	c1	0.145469	c1	-0.0460973	c2	-0.0150944	c2	0.143033	c21	0.266877	c21	0.0801778	c22	0.0223605	c22	0.0700027	c32	0.0184052	c32	-0.174996	c31	-0.346021	c31	0	1	0	0	0	-31	0	1	1	1	.0.0.0.-31.0
RPL12	-0.0353371	c1	-0.0239938	c1	-0.037703	c2	-0.0308729	c2	-0.150192	c21	-0.0449837	c21	0.103791	c22	-0.00760039	c22	-0.0552513	c32	0.0137359	c32	0.0106247	c31	0.026067	c31	0	0	0	0	0	0	0		0	0
RPL13A	0.0623815	c1	0.161373	c1	0.0487721	c2	0.112051	c2	-0.0343277	c21	0.0815028	c21	0.013858	c22	0.0401121	c22	0.0888822	c32	0.100441	c32	0.0730107	c31	0.0598033	c31	0	1	0	0	0	0	0	0	0	0
RPL18	-0.0324576	c1	-0.0783078	c1	-0.0450878	c2	-0.0113344	c2	-0.132515	c21	-0.0556541	c21	0.0920783	c22	0.0887802	c22	0.016561	c32	-0.0160941	c32	-0.0257121	c31	-0.0176769	c31	0	1	0	0	0	0	0	0	0	0
RPL23a	-0.0363767	c1	-0.0670606	c1	0.00571983	c2	0.061668	c2	-0.0156788	c21	0.00132651	c21	0.0080669	c22	0.0345817	c22	0.0487871	c32	0.0915935	c32	-0.022115	c31	-0.0338888	c31	0	1	0	0	0	0	0	0	0	0
RPL24	0.0508542	c1	-0.0315233	c1	-0.0403083	c2	-0.0155428	c2	-0.0768815	c21	0.144263	c21	-0.0171242	c22	-0.0382996	c22	-0.0189095	c32	0.011345	c32	0.0473391	c31	-0.139155	c31	0	1	0	0	0	0	0	0	0	0
RPL29	0.00630275	c1	-0.0208977	c1	-0.15518	c2	-0.115236	c2	0.00127738	c21	0.0520437	c21	-0.07459	c22	-0.0358148	c22	-0.0497834	c32	-0.012893	c32	-0.0420006	c31	-0.00751456	c31	0	1	0	0	0	0	0	0	0	0
RPL36	0.0495276	c1	0.0494739	c1	-0.0599689	c2	-0.0630248	c2	0.0079295	c21	-0.031047	c21	-0.0157349	c22	-0.00741259	c22	-0.0207698	c32	-0.0201405	c32	0.0868384	c31	0.0614926	c31	0	1	0	0	0	0	0	0	0	0
RPL37	-0.0380194	c1	-0.00546124	c1	-0.0193198	c2	0.00641751	c2	0.100643	c21	0.0868887	c21	0.0576899	c22	0.0212492	c22	0.00408506	c32	-0.00513752	c32	-0.0455948	c31	-0.0798861	c31	0	1	0	0	0	0	0	0	0	0
RPL4	0.0762487	c1	0.047469	c1	0.0061538	c2	0.0237237	c2	0.0538265	c21	0.0615756	c21	-0.00284335	c22	-0.0056329	c22	0.097144	c32	0.0585713	c32	-0.180719	c31	-0.114635	c31	0	1	0	0	0	0	0	0	0	0
RPL41	-0.151684	c1	-0.102097	c1	-0.189454	c2	-0.0905106	c2	0.0182306	c21	0.0609954	c21	-0.0889897	c22	-0.0418921	c22	-0.0209848	c32	-0.0327897	c32	-0.119076	c31	-0.139106	c31	0	1	0	0	0	0	0	0	0	0
RPL5	-0.0794329	c1	-0.144094	c1	0.0200912	c2	0.0426525	c2	-0.00135415	c21	0.0276881	c21	-0.0256078	c22	0.00526095	c22	0.0207704	c32	-0.0161029	c32	-0.083122	c31	-0.0821397	c31	0	1	0	0	0	0	0	0	0	0
RPL6	0.0823839	c1	0.0680513	c1	0.0100193	c2	0.0188747	c2	-0.0990552	c21	-0.0678919	c21	0.0259994	c22	0.017366	c22	0.0788582	c32	0.0427243	c32	0.124765	c31	0.12983	c31	0	1	0	0	0	0	0	0	0	0
RPL7A	-0.00622634	c1	-0.0340746	c1	-0.03976	c2	-0.0306986	c2	-0.0445306	c21	-0.0238098	c21	0.0861845	c22	0.0919826	c22	0.05689	c32	0.028413	c32	0.00372504	c31	-0.0113373	c31	0	1	0	0	0	0	0	0	0	0
RPL8	0.0785576	c1	0.0332947	c1	-0.0733905	c2	-0.0618126	c2	0.00429684	c21	0.0977796	c21	0.0226923	c22	0.0315911	c22	0.0448967	c32	0.0116676	c32	-0.0599092	c31	-0.129591	c31	0	1	0	0	0	0	0	0	0	0
RPLP0	-0.0776183	c1	-0.0343639	c1	0.0552295	c2	0.039153	c2	0.229013	c21	0.095271	c21	-0.260534	c22	-0.215323	c22	0.212202	c32	0.139317	c32	-0.278551	c31	-0.148506	c31	0	1	0	0	-22	0	0	1	0	1	.0.0.-22.0.0
RPLP1	0.0876536	c1	0.0123264	c1	-0.0640631	c2	-0.0419091	c2	-0.104093	c21	-0.0815421	c21	-0.0440741	c22	-0.028168	c22	-0.0104126	c32	-0.00906355	c32	0.026407	c31	0.0193647	c31	1	1	0	0	0	0	0	0	0	0
RPLP2	0.028068	c1	0.00601022	c1	0.00716185	c2	0.0158104	c2	-0.170626	c21	-0.128786	c21	0.0572508	c22	0.082519	c22	-0.0315061	c32	-0.0763246	c32	0.0165798	c31	-0.0163838	c31	0	1	0	0	0	0	0	0	0	0
RPM1	0.0367517	c1	0.00661246	c1	-0.0303595	c2	-0.0142172	c2	-0.110903	c21	-0.118908	c21	-0.0451684	c22	-0.0200836	c22	0.0180801	c32	0.00726524	c32	0.0763158	c31	0.05732	c31	0	0	0	0	0	0	0		0	0
RPP40	0.065657	c1	0.0501218	c1	-0.0101529	c2	-0.00223407	c2	-0.030477	c21	-0.00471499	c21	-0.00905737	c22	0.0180135	c22	-0.00761684	c32	-0.000405565	c32	0.0605965	c31	-0.0100278	c31	0	0	0	0	0	0	0		0	0
RPS12	0.247982	c1	0.156485	c1	-0.0339193	c2	-0.0254249	c2	-0.236487	c21	-0.124036	c21	-0.0298945	c22	0.00895704	c22	0.00992977	c32	-0.0130984	c32	0.129352	c31	0.0233228	c31	0	1	1	0	0	0	0	0	0	1	.1.0.0.0.0
RPS13	0.0503045	c1	-0.0547253	c1	0.00580147	c2	0.0728835	c2	-0.125348	c21	-0.0588704	c21	0.0575303	c22	0.112861	c22	0.077646	c32	0.0454358	c32	0.0877467	c31	0.0718319	c31	0	1	0	0	0	0	0	0	0	0
RPS15a	0.00824889	c1	0.0125053	c1	0.00795218	c2	0.0096917	c2	0.0174003	c21	-0.00565428	c21	-0.0611517	c22	-0.0620111	c22	-0.0190362	c32	-0.0177198	c32	0.0538094	c31	0.015701	c31	0	0	0	0	0	0	0		0	0
RPS16	0.1823	c1	0.106223	c1	-0.0740329	c2	-0.0622762	c2	0.0870197	c21	0.0675014	c21	-0.161384	c22	-0.0893548	c22	0.116936	c32	0.0722647	c32	-0.0963001	c31	-0.128785	c31	0	1	0	0	0	0	0	0	0	0
RPS17	0.015455	c1	-0.029971	c1	-0.0419008	c2	-0.0234828	c2	-0.0267751	c21	-0.0197592	c21	0.0127153	c22	0.0240467	c22	-0.0165347	c32	-0.0499376	c32	-0.0393309	c31	-0.0142522	c31	0	1	0	0	0	0	0	0	0	0
RPS18	-0.186292	c1	-0.0681514	c1	0.145205	c2	0.123283	c2	0.432821	c21	0.242627	c21	-0.328507	c22	-0.290397	c22	0.36729	c32	0.350048	c32	-0.490409	c31	-0.303789	c31	0	1	0	21	-22	-31	32	1	1	1	.0.21.-22.-31.32
RPS19BP1	0.123413	c1	0.0471232	c1	-0.068872	c2	-0.0298141	c2	-0.0945331	c21	-0.0736472	c21	0.103436	c22	0.0613379	c22	-0.0426242	c32	-0.0536204	c32	0.0799062	c31	0.0421201	c31	0	1	0	0	0	0	0	0	0	0
RPS20	-0.0492754	c1	-0.0253113	c1	-0.00521832	c2	0.0189729	c2	-0.022428	c21	-0.0568294	c21	-0.00280707	c22	0.011698	c22	-0.00203811	c32	-0.0750328	c32	-0.029242	c31	0.00956232	c31	0	1	0	0	0	0	0	0	0	0
RPS23	0.00532709	c1	-0.0641246	c1	-0.0331322	c2	-0.0314065	c2	0.0302214	c21	0.149555	c21	0.0506914	c22	0.0634529	c22	-0.032754	c32	-0.0693682	c32	-0.0460623	c31	-0.150504	c31	0	1	0	0	0	0	0	0	0	0
RPS24	0.180201	c1	0.129977	c1	-0.0620178	c2	-0.0417468	c2	-0.113101	c21	-0.0870432	c21	0.00244687	c22	-0.00104071	c22	-0.00651769	c32	-0.0163005	c32	0.0411788	c31	0.0124617	c31	0	1	0	0	0	0	0	0	0	0
RPS25	0.0147812	c1	-0.00276274	c1	-0.043493	c2	-0.019401	c2	0.0749348	c21	0.0660288	c21	-0.0367294	c22	0.00395306	c22	-0.00141964	c32	-0.0339387	c32	-0.141352	c31	-0.127847	c31	0	1	0	0	0	0	0	0	0	0
RPS28	0.019804	c1	0.0332445	c1	0.0174241	c2	-0.00439011	c2	-0.0701122	c21	-0.0451146	c21	-0.0420075	c22	-0.0468649	c22	0.056105	c32	-0.0257911	c32	-0.0676869	c31	-0.0776965	c31	0	1	0	0	0	0	0	0	0	0
RPS3A	-0.0673654	c1	-0.083062	c1	-0.0413067	c2	-0.0387719	c2	-0.00503188	c21	0.0212359	c21	0.0439576	c22	0.00773022	c22	0.0663007	c32	0.0361252	c32	-0.0918731	c31	-0.0476251	c31	0	1	0	0	0	0	0	0	0	0
RPS7	0.00355608	c1	-0.0268183	c1	-0.0558904	c2	-0.0335112	c2	-0.0293306	c21	-0.0280102	c21	0.0616579	c22	0.071984	c22	-0.02703	c32	-0.0660246	c32	0.0130533	c31	-0.0098637	c31	0	1	0	0	0	0	0	0	0	0
RRAS	0.0435988	c1	-0.00654895	c1	-0.0439054	c2	-0.0341532	c2	-0.0249998	c21	0.0912339	c21	0.0857707	c22	0.0763988	c22	-0.0475366	c32	-0.0980788	c32	-0.039222	c31	-0.108169	c31	0	1	0	0	0	0	0	0	0	0
RRM1	0.0842749	c1	0.0331145	c1	-0.0491335	c2	-0.0351217	c2	-0.103495	c21	-0.0941634	c21	-0.0545298	c22	-0.0419862	c22	0.0559661	c32	0.0442183	c32	0.0482411	c31	0.0247041	c31	1	1	0	0	0	0	0	0	0	0
RSL1D1	0.067219	c1	0.00601204	c1	-0.0674172	c2	-0.045962	c2	-0.071043	c21	0.0322242	c21	0.0533462	c22	0.0568935	c22	-0.0568569	c32	-0.0457488	c32	-0.0697711	c31	-0.0793474	c31	0	1	0	0	0	0	0	0	0	0
S100A10	0.118527	c1	0.0573547	c1	-0.0670144	c2	-0.0316314	c2	-0.243541	c21	-0.212257	c21	0.0285656	c22	0.0404643	c22	-0.0644373	c32	-0.066585	c32	0.163304	c31	0.0960994	c31	0	1	0	-21	0	0	0	1	1	1	.0.-21.0.0.0
SAC-mislocalized	0.284313	c1	0.292609	c1	-0.230751	c2	-0.309369	c2	-0.374785	c21	-0.189743	c21	-0.202333	c22	-0.0549012	c22	0.116744	c32	0.0161411	c32	-0.0849105	c31	0.166131	c31	0	0	1	-21	0	0	0		1	1
SAFB2	-0.010586	c1	-0.0394267	c1	0.00329917	c2	-0.00253159	c2	-0.104994	c21	-0.0285101	c21	-0.021737	c22	-0.0129306	c22	-0.00427479	c32	-0.0430383	c32	0.0537344	c31	-0.0161427	c31	0	1	0	0	0	0	0	0	0	0
SAP30BP	-0.147179	c1	-0.130179	c1	0.0283572	c2	0.0440144	c2	-0.154777	c21	-0.113096	c21	0.0117142	c22	0.00849528	c22	0.0596419	c32	0.0176462	c32	-0.0471703	c31	-0.0743453	c31	0	1	0	0	0	0	0	0	0	0
SCAMP2	0.067077	c1	0.0561725	c1	-0.00639158	c2	-0.00391522	c2	0.0568717	c21	0.0304372	c21	-0.0803012	c22	-0.0465278	c22	0.0557713	c32	0.0416303	c32	0.0668552	c31	0.0561626	c31	0	1	0	0	0	0	0	0	0	0
SEC14L1	0.0758744	c1	0.0488809	c1	-0.0555055	c2	-0.061763	c2	-0.0490099	c21	-0.0401782	c21	0.0148941	c22	0.0188386	c22	-0.0148918	c32	-0.0242432	c32	-0.0100684	c31	-0.0095738	c31	0	1	0	0	0	0	0	0	0	0
SELM	0.0485633	c1	0.0750009	c1	0.0878273	c2	0.0725586	c2	0.0728673	c21	0.0060185	c21	-0.0907186	c22	-0.096191	c22	0.0750712	c32	0.106355	c32	-0.050459	c31	0.0236809	c31	0	1	0	0	0	0	0	0	0	0
SERF2	-0.0494036	c1	-0.05277	c1	0.0342495	c2	0.0417082	c2	0.0578783	c21	0.0518696	c21	0.00225808	c22	0.0199922	c22	0.108338	c32	0.0895602	c32	-0.195559	c31	-0.19418	c31	0	1	0	0	0	-31	0	1	1	1	.0.0.0.-31.0
SERPINB6	-0.0410087	c1	-0.0518091	c1	-0.0146329	c2	0.000933934	c2	-0.165928	c21	-0.132517	c21	-0.0212818	c22	0.00738221	c22	-0.0733219	c32	-0.115436	c32	0.0816305	c31	-0.000715549	c31	0	0	0	0	0	0	0		0	0
SETMAR	0.109451	c1	0.0553751	c1	-0.0388774	c2	-0.0271097	c2	-0.0123069	c21	0.00462796	c21	-0.0669112	c22	-0.0229702	c22	0.0110921	c32	-0.0233242	c32	-0.0620234	c31	-0.0574632	c31	0	0	0	0	0	0	0		0	0
SF3B1	-0.0285624	c1	0.0239938	c1	0.091722	c2	0.0309259	c2	-0.0605909	c21	-0.0635227	c21	-0.0235179	c22	-0.0347605	c22	0.12929	c32	0.104817	c32	-0.127201	c31	-0.132488	c31	0	1	0	0	0	0	0	0	0	0
SF3B14	0.0994357	c1	0.0223168	c1	-0.0617371	c2	-0.032125	c2	0.0673936	c21	0.0703971	c21	-0.0415475	c22	-0.0341697	c22	-0.0709286	c32	-0.0780913	c32	0.0993726	c31	0.0378238	c31	0	1	0	0	0	0	0	0	0	0
SFRS10	-0.0409169	c1	0.0165977	c1	0.00338876	c2	0.00882393	c2	-0.115761	c21	-0.0310553	c21	0.0880528	c22	0.0824159	c22	-0.028948	c32	-0.0654027	c32	-0.0393072	c31	-0.0385279	c31	0	1	0	0	0	0	0	0	0	0
SFRS7	-0.16406	c1	-0.165622	c1	-0.0366175	c2	-0.0452962	c2	0.171633	c21	0.140277	c21	-0.0624289	c22	-0.0454772	c22	-0.00403948	c32	-0.0238531	c32	-0.21105	c31	-0.18016	c31	0	1	-1	0	0	-31	0	1	1	1	.-1.0.0.-31.0
SH3GLB1	-0.0765648	c1	-0.0887751	c1	-0.0042896	c2	0.0237017	c2	-0.157879	c21	-0.134426	c21	0.0248261	c22	0.0434221	c22	0.0246755	c32	-0.0753855	c32	0.0356524	c31	-0.0786676	c31	0	1	0	0	0	0	0	0	0	0
SH3KBP1	-0.00391585	c1	-0.0506471	c1	-0.00981016	c2	0.0201852	c2	-0.172197	c21	-0.112477	c21	0.0034456	c22	-0.0144328	c22	0.0280584	c32	0.00995399	c32	0.000261517	c31	-0.000275637	c31	1	1	0	0	0	0	0	0	0	0
SIVA	-0.0141492	c1	-0.00457685	c1	-0.0241797	c2	-0.00606371	c2	-0.165418	c21	-0.129086	c21	0.0577307	c22	0.0525888	c22	0.0590765	c32	0.0483938	c32	-0.112112	c31	-0.133457	c31	0	0	0	0	0	0	0		0	0
SLBP	-0.0485667	c1	-0.0676736	c1	0.014117	c2	0.00935524	c2	0.00231058	c21	-0.00587617	c21	0.0412916	c22	0.0322655	c22	-0.036164	c32	-0.0496243	c32	-0.0555338	c31	-0.0673846	c31	0	1	0	0	0	0	0	0	0	0
SLC20A2	-0.0858023	c1	-0.0956274	c1	0.0180727	c2	0.0420123	c2	0.586148	c21	0.396493	c21	0.0416965	c22	-0.0685205	c22	0.0521831	c32	0.10391	c32	-0.537662	c31	-0.426882	c31	0	1	0	21	0	-31	0	1	1	1	.0.21.0.-31.0
SLC22A18AS	-0.00489776	c1	-0.0647366	c1	-0.0224111	c2	-0.00526442	c2	-0.185847	c21	-0.0996511	c21	0.0425603	c22	0.0543563	c22	-0.0315074	c32	-0.0724605	c32	0.0771894	c31	0.0297771	c31	0	0	0	0	0	0	0		0	0
SLC25A37	0.234431	c1	0.220983	c1	0.0500306	c2	0.0752817	c2	0.133476	c21	0.0209088	c21	0.090682	c22	0.00680533	c22	0.0342331	c32	0.0332411	c32	0.0620175	c31	0.0742772	c31	0	1	1	0	0	0	0	0	0	1	.1.0.0.0.0
SLC6A7	0.157194	c1	0.0965926	c1	-0.0939699	c2	-0.0834266	c2	-0.163582	c21	-0.136564	c21	0.00377149	c22	0.0111505	c22	0.0439745	c32	0.0443959	c32	0.120921	c31	0.104687	c31	0	1	0	0	0	0	0	0	0	0
SLC9A3R1	0.0271112	c1	-0.0143994	c1	0.0453716	c2	0.0140758	c2	-0.0400714	c21	-0.085758	c21	-0.0652161	c22	-0.062035	c22	0.0527515	c32	0.0303756	c32	-0.0902683	c31	-0.0658785	c31	0	1	0	0	0	0	0	0	0	0
SLTM	-0.0315658	c1	0.0508999	c1	0.0122311	c2	0.0349003	c2	0.0215495	c21	0.0430413	c21	-0.00750917	c22	0.0406106	c22	0.00721993	c32	-0.0245824	c32	-0.108038	c31	-0.098414	c31	0	1	0	0	0	0	0	0	0	0
SMS	-0.0207436	c1	-0.067587	c1	-0.0256586	c2	-0.0195005	c2	-0.0609846	c21	-0.0417809	c21	-0.0494852	c22	-0.0359472	c22	0.00945261	c32	-0.00979354	c32	-0.0481815	c31	-0.0401495	c31	0	1	0	0	0	0	0	0	0	0
SNRPC	-0.0606289	c1	-0.0238685	c1	-0.0583309	c2	0.0350326	c2	-0.121198	c21	-0.12624	c21	-0.108007	c22	-0.0458036	c22	-0.0588017	c32	-0.176996	c32	-0.100681	c31	-0.226646	c31	0	0	0	0	0	0	0		0	0
SNX3	0.0577056	c1	0.0379149	c1	-0.0354484	c2	-0.0168796	c2	-0.0446734	c21	0.0147827	c21	0.0159088	c22	0.0231597	c22	-0.0302332	c32	-0.00229106	c32	-0.0309406	c31	-0.0715941	c31	0	1	0	0	0	0	0	0	0	0
SNX6	-0.0211986	c1	-0.0414084	c1	-0.0142651	c2	0.00841976	c2	-0.0842312	c21	-0.0419168	c21	-0.0116866	c22	-0.00294745	c22	0.00411596	c32	-0.00188251	c32	-0.0553074	c31	0.00687053	c31	0	1	0	0	0	0	0	0	0	0
SPATA12	0.152628	c1	0.111158	c1	-0.0892162	c2	-0.064981	c2	-0.0458279	c21	-0.0420265	c21	0.0120483	c22	0.0451213	c22	0.0800632	c32	0.0365653	c32	-0.150771	c31	-0.13756	c31	0	1	0	0	0	0	0	0	0	0
SPATS2	0.0303348	c1	0.0400077	c1	-0.0302506	c2	-0.0341345	c2	0.0410319	c21	0.0539902	c21	-0.010642	c22	0.00564174	c22	-0.00744857	c32	-0.01544	c32	-0.0792679	c31	-0.11283	c31	0	1	0	0	0	0	0	0	0	0
SPCS1	0.149982	c1	0.111707	c1	0.0285828	c2	0.0249969	c2	-0.0144875	c21	0.00269846	c21	-0.0747328	c22	-0.043275	c22	0.0733434	c32	0.031631	c32	-0.0307663	c31	-0.0174713	c31	0	1	0	0	0	0	0	0	0	0
SPCS2	0.0214244	c1	0.0496068	c1	0.0122733	c2	0.00840837	c2	-0.0578336	c21	-0.0048971	c21	0.0355968	c22	0.0336887	c22	0.0216072	c32	-0.0136627	c32	-0.0331821	c31	-0.0530923	c31	0	1	0	0	0	0	0	0	0	0
SPG20	0.125923	c1	0.18521	c1	-0.0701273	c2	0.0463344	c2	-0.00855737	c21	-0.0436257	c21	0.050642	c22	0.0577971	c22	-0.0141092	c32	0.00290541	c32	-0.0447388	c31	-0.0372135	c31	0	1	0	0	0	0	0	0	0	0
SR140	-0.105783	c1	-0.0697288	c1	0.023955	c2	0.0296875	c2	-0.204226	c21	-0.165442	c21	-0.0254243	c22	-0.0321489	c22	0.0955673	c32	0.0899349	c32	-0.0976638	c31	-0.0823061	c31	0	1	0	-21	0	0	0	1	1	1	.0.-21.0.0.0
SR624523	0.0109783	c1	0.00854955	c1	0.0101917	c2	0.0131548	c2	-0.0862563	c21	-0.0583819	c21	-0.0985854	c22	-0.0739927	c22	0.076407	c32	0.0451632	c32	0.0363289	c31	-0.0425061	c31	0	0	0	0	0	0	0		0	0
SRI	0.0146361	c1	-0.0178539	c1	-0.0276014	c2	-0.0247644	c2	0.0334395	c21	0.0676578	c21	0.0268256	c22	0.0497261	c22	-0.00259055	c32	-0.0505246	c32	-0.0760104	c31	-0.117608	c31	0	0	0	0	0	0	0		0	0
SRM	0.112587	c1	0.0584936	c1	-0.018973	c2	-0.0359759	c2	-0.191225	c21	-0.120235	c21	-0.019381	c22	0.0174111	c22	-0.0279992	c32	-0.0604896	c32	0.139046	c31	0.0509749	c31	0	1	0	0	0	0	0	0	0	0
SRRM1	0.0705434	c1	0.0524833	c1	-0.0379419	c2	-0.030673	c2	-0.0723797	c21	-0.000683597	c21	0.0939686	c22	0.06556	c22	-0.0154348	c32	-0.0621794	c32	-0.0818488	c31	-0.0704304	c31	0	1	0	0	0	0	0	0	0	0
SRRM2	0.0365241	c1	0.0581709	c1	-0.0426256	c2	-0.00103405	c2	0.0372818	c21	0.0137431	c21	-0.0160466	c22	-0.000395504	c22	0.0526972	c32	-0.0197279	c32	-0.0315547	c31	-0.00928918	c31	1	1	0	0	0	0	0	0	0	0
SSBP1	-0.330711	c1	-0.261559	c1	-0.0152141	c2	-0.0358722	c2	-0.0363448	c21	-0.0975056	c21	0.0731404	c22	0.0423454	c22	0.0207417	c32	-0.0552576	c32	-0.155539	c31	-0.0750985	c31	0	1	-1	0	0	0	0	0	0	1	.-1.0.0.0.0
STAU1	-0.108505	c1	-0.161871	c1	-0.0119278	c2	-0.0442145	c2	-0.0396032	c21	-0.0915885	c21	-0.110335	c22	-0.147592	c22	0.0682222	c32	0.0291569	c32	-0.162236	c31	-0.219072	c31	0	1	0	0	0	-31	0	1	1	1	.0.0.0.-31.0
SUMO2	0.0445742	c1	0.0704666	c1	-0.015489	c2	0.0254525	c2	-0.134829	c21	-0.0263219	c21	0.109968	c22	0.0959169	c22	-0.0661361	c32	-0.0676012	c32	0.0943778	c31	0.0164589	c31	1	1	0	0	0	0	0	0	0	0
T85821	0.0468449	c1	0.00740109	c1	-0.0646026	c2	-0.0282171	c2	-0.0584952	c21	-0.0795016	c21	-0.0870743	c22	-0.0503487	c22	0.0723395	c32	0.0375491	c32	-0.125356	c31	-0.0894361	c31	0	1	0	0	0	0	0	0	0	0
T85822	0.0166359	c1	0.0176547	c1	0.0129145	c2	0.0140061	c2	-0.0230556	c21	-0.0101054	c21	-0.0787056	c22	-0.0579654	c22	0.0692199	c32	0.052853	c32	-0.0894886	c31	-0.111346	c31	0	0	0	0	0	0	0		0	0
T85823	0.028693	c1	-0.00252532	c1	-0.0283253	c2	0.00323333	c2	-0.0530245	c21	-0.0571377	c21	-0.104621	c22	-0.103709	c22	0.0825075	c32	0.046515	c32	-0.0443509	c31	-0.0770777	c31	0	0	0	0	0	0	0		0	0
T85824	0.021702	c1	-0.0152916	c1	-0.00105558	c2	0.00971442	c2	-0.051548	c21	-0.0701723	c21	-0.0845962	c22	-0.0961227	c22	0.0678857	c32	0.0553298	c32	-0.0657494	c31	-0.0505277	c31	0	0	0	0	0	0	0		0	0
TARS	-0.190596	c1	-0.180085	c1	-0.0911974	c2	-0.0654122	c2	0.163025	c21	0.0846918	c21	0.0627029	c22	0.052823	c22	-0.0675474	c32	-0.0823409	c32	-0.264554	c31	-0.183548	c31	0	1	-1	0	0	-31	0	1	1	1	.-1.0.0.-31.0
TBCB	0.0431758	c1	0.0130604	c1	-0.0352201	c2	-0.0211346	c2	-0.0647966	c21	-0.0356788	c21	-0.0292041	c22	0.00759547	c22	0.0241214	c32	-0.014826	c32	-0.0348075	c31	-0.00851773	c31	0	1	0	0	0	0	0	0	0	0
TDG	0.0196206	c1	-0.0458499	c1	-0.00676437	c2	0.0216043	c2	-0.0781214	c21	0.0180173	c21	0.0137577	c22	0.0391424	c22	-0.00722473	c32	-0.0396894	c32	-0.0539242	c31	-0.0919924	c31	1	1	0	0	0	0	0	0	0	0
TES	0.0952214	c1	0.0279509	c1	-0.0333278	c2	0.00218903	c2	0.0451481	c21	0.0325268	c21	-0.0346618	c22	-0.0285604	c22	-0.0435117	c32	-0.0687493	c32	0.00539979	c31	-0.053279	c31	0	1	0	0	0	0	0	0	0	0
TFAM	0.0422785	c1	0.0186808	c1	-0.0196952	c2	-0.0168169	c2	0.0708402	c21	0.0844014	c21	0.00600334	c22	0.0181748	c22	0.0982224	c32	0.07111	c32	-0.158282	c31	-0.155964	c31	0	1	0	0	0	-31	0	1	1	1	.0.0.0.-31.0
THAP7	0.17251	c1	0.127299	c1	-0.0799024	c2	-0.070717	c2	0.0804477	c21	-0.0153564	c21	-0.132029	c22	-0.124979	c22	0.026183	c32	-0.0030001	c32	0.0477081	c31	0.00919295	c31	0	0	0	0	0	0	0		0	0
TIMP2	0.069941	c1	0.00621704	c1	-0.101788	c2	-0.0709403	c2	0.0918024	c21	0.0526535	c21	-0.0464586	c22	-0.0249373	c22	-0.100892	c32	-0.0957499	c32	0.0118847	c31	-0.16871	c31	0	1	0	0	0	0	0	0	0	0
TJP1	0.00134633	c1	0.0120513	c1	0.0200699	c2	0.0140816	c2	0.0629696	c21	0.0300045	c21	-0.063524	c22	-0.0568635	c22	0.0523634	c32	0.0504856	c32	0.0219251	c31	0.0206631	c31	0	1	0	0	0	0	0	0	0	0
TLCD1	0.0291714	c1	-0.0132501	c1	-0.0152733	c2	-0.00657102	c2	-0.109491	c21	-0.108616	c21	-0.128832	c22	-0.10809	c22	0.0844423	c32	0.076942	c32	0.0526465	c31	0.0324522	c31	0	1	0	0	0	0	0	0	0	0
TLN2	0.0572495	c1	0.0978373	c1	0.0305073	c2	0.0357453	c2	-0.0457231	c21	-0.00464788	c21	0.0291068	c22	0.0423449	c22	0.078619	c32	0.0411783	c32	-0.155047	c31	-0.163518	c31	0	1	0	0	0	-31	0	1	1	1	.0.0.0.-31.0
TLOC1	0.0825338	c1	0.00864288	c1	-0.0085822	c2	-0.0248832	c2	-0.0419609	c21	-0.030403	c21	0.0375759	c22	0.0795248	c22	-0.00504231	c32	-0.00752223	c32	0.0284047	c31	-0.00296509	c31	0	1	0	0	0	0	0	0	0	0
TMEM111	0.12119	c1	0.00496216	c1	0.0220954	c2	0.0566563	c2	0.191222	c21	0.1673	c21	-0.0400396	c22	-0.0318823	c22	-0.0295797	c32	-0.00155408	c32	-0.146463	c31	-0.166319	c31	1	1	0	21	0	0	0		1	0
TMEM123	-0.0685818	c1	-0.0700586	c1	0.0607663	c2	0.0849276	c2	0.0911973	c21	0.0523512	c21	-0.0778523	c22	-0.0461604	c22	0.10259	c32	0.0998468	c32	-0.0982231	c31	-0.0853494	c31	0	1	0	0	0	0	0	0	0	0
TMEM132D	-0.0123905	c1	0.0373476	c1	0.040218	c2	0.0349522	c2	-0.0216943	c21	0.0087255	c21	0.0119941	c22	0.00953821	c22	0.0153911	c32	-0.028863	c32	-0.0423449	c31	-0.104331	c31	0	1	0	0	0	0	0	0	0	0
TMEM49	0.0443031	c1	0.0300186	c1	0.0151992	c2	0.040722	c2	-0.0500159	c21	-0.0773412	c21	-0.0294404	c22	-0.0141875	c22	0.0833741	c32	0.0481141	c32	-0.0884308	c31	-0.103125	c31	0	1	0	0	0	0	0	0	0	0
TMPO	0.0423849	c1	0.0400655	c1	-0.0284027	c2	-0.0231341	c2	-0.0555462	c21	0.0431846	c21	0.0381594	c22	0.0575205	c22	-0.0103692	c32	-0.059249	c32	-0.0123547	c31	-0.0613431	c31	0	1	0	0	0	0	0	0	0	0
TNRC5	-0.00651163	c1	0.00743631	c1	-0.0353962	c2	-0.0176766	c2	0.0107102	c21	0.0645923	c21	0.0552186	c22	0.0419682	c22	-0.0210524	c32	-0.0389058	c32	-0.0697391	c31	-0.0835902	c31	0	0	0	0	0	0	0		0	0
TOMM7	0.0606405	c1	0.0170683	c1	-0.0286458	c2	-0.0170343	c2	-0.122339	c21	-0.120756	c21	-0.0759051	c22	-0.0597516	c22	0.0449963	c32	0.0185539	c32	0.0526127	c31	0.0110109	c31	1	1	0	0	0	0	0	0	0	0
TOMM70A	0.166502	c1	0.0983805	c1	0.0132563	c2	0.0182265	c2	0.15378	c21	0.165356	c21	0.063867	c22	0.0940855	c22	-0.0536647	c32	-0.0554701	c32	-0.144798	c31	-0.166821	c31	0	1	0	21	0	0	0	1	1	1	.0.21.0.0.0
TOP1	0.039156	c1	0.0217117	c1	0.00508832	c2	0.00166293	c2	-0.0823	c21	0.0130945	c21	0.0340082	c22	0.0300462	c22	-0.00219017	c32	-0.0295703	c32	-0.0222862	c31	-0.0660912	c31	0	1	0	0	0	0	0	0	0	0
TPM1	0.00186385	c1	0.0304942	c1	0.000324742	c2	-0.0083202	c2	0.031239	c21	-0.0108956	c21	-0.0575267	c22	-0.0385532	c22	0.0820558	c32	0.0662301	c32	-0.104538	c31	-0.0866539	c31	0	1	0	0	0	0	0	0	0	0
TPM3	0.0461142	c1	0.00397061	c1	-0.00230832	c2	-0.00760079	c2	0.0205303	c21	-0.00631321	c21	-0.114633	c22	-0.106064	c22	0.0370024	c32	-0.0151731	c32	-0.0541235	c31	-0.0759064	c31	1	1	0	0	0	0	0	0	0	0
TRAPPC6A	0.144848	c1	0.0697767	c1	-0.0169313	c2	-0.0274298	c2	-0.00789877	c21	-0.0106753	c21	-0.056034	c22	-0.0220615	c22	0.0620295	c32	0.031835	c32	0.0117997	c31	-0.0136081	c31	0	1	0	0	0	0	0	0	0	0
TRIM25	0.0655595	c1	0.0524882	c1	-0.00193922	c2	0.00104495	c2	-0.140501	c21	-0.117574	c21	0.0134165	c22	0.0241133	c22	0.0397273	c32	0.0165575	c32	0.0473267	c31	0.00475283	c31	0	1	0	0	0	0	0	0	0	0
TUBA1B	0.00774642	c1	-0.0150351	c1	-0.0196883	c2	-0.00972208	c2	-0.0231038	c21	-0.0080765	c21	-0.0595707	c22	-0.0330113	c22	0.111398	c32	0.0578437	c32	-0.139717	c31	-0.168384	c31	0	1	0	0	0	0	0	0	0	0
TUBA6	0.224142	c1	0.126003	c1	-0.119519	c2	-0.0964904	c2	-0.140901	c21	-0.0561429	c21	0.0531154	c22	0.073304	c22	-0.0677114	c32	-0.100005	c32	-0.0234152	c31	-0.0869034	c31	0	1	0	0	0	0	0	0	0	0
TUBB2C	0.0122689	c1	-0.0218473	c1	-0.00912488	c2	0.0106766	c2	-0.0469263	c21	-0.0314352	c21	-0.0758439	c22	-0.0428332	c22	0.0274101	c32	0.011109	c32	-0.0361114	c31	-0.0267691	c31	0	1	0	0	0	0	0	0	0	0
TWF1	0.0022818	c1	-0.00889978	c1	0.028121	c2	0.0183082	c2	-0.106521	c21	-0.0597234	c21	0.0983346	c22	0.085897	c22	-0.0205857	c32	-0.0544738	c32	-0.00481507	c31	-0.083564	c31	0	1	0	0	0	0	0	0	0	0
TXN	0.0746757	c1	0.0682549	c1	-0.0523446	c2	-0.0394683	c2	-0.0425727	c21	-0.0173901	c21	-0.0287635	c22	0.0504243	c22	-0.0291257	c32	-0.0960223	c32	-0.0559922	c31	-0.0288072	c31	1	1	0	0	0	0	0	0	0	0
TXN2	-0.0456193	c1	-0.0654514	c1	-0.0645252	c2	-0.0329854	c2	0.0243997	c21	0.0730207	c21	0.0420934	c22	0.0196559	c22	-0.0337873	c32	-0.026736	c32	-0.0740399	c31	-0.0953612	c31	0	0	0	0	0	0	0		0	0
TXNL1	-0.121556	c1	-0.0518435	c1	0.0350048	c2	0.0426764	c2	-0.113836	c21	-0.113017	c21	-0.0396038	c22	-0.0201954	c22	-0.013833	c32	-0.00570537	c32	0.118341	c31	0.0816716	c31	0	1	0	0	0	0	0	0	0	0
TXNRD1	-0.105609	c1	-0.102447	c1	0.0319304	c2	0.0350926	c2	0.0562063	c21	0.0318098	c21	-0.0192668	c22	-0.00324169	c22	0.00819515	c32	-0.00775655	c32	-0.180622	c31	-0.111655	c31	0	1	0	0	0	0	0	0	0	0
U29115	-0.0344054	c1	-0.0490157	c1	-0.00822597	c2	0.0112198	c2	-0.213015	c21	-0.0703877	c21	0.0783126	c22	0.0714312	c22	-0.0556895	c32	-0.0871209	c32	-0.0733617	c31	0.00572785	c31	0	0	0	0	0	0	0		0	0
U2AF1	-0.081031	c1	-0.0702715	c1	-0.0250818	c2	-0.022111	c2	0.077612	c21	0.153293	c21	0.0221051	c22	0.011476	c22	-0.00338574	c32	-0.00570089	c32	-0.195992	c31	-0.233873	c31	0	1	0	0	0	-31	0	1	1	1	.0.0.0.-31.0
UAP1	0.0379994	c1	0.0291665	c1	-0.0105524	c2	0.00574466	c2	-0.039235	c21	-0.0198027	c21	-0.0738211	c22	-0.0272046	c22	0.0135006	c32	0.0423042	c32	-0.0168422	c31	0.007846	c31	0	1	0	0	0	0	0	0	0	0
UBE2D2	-0.0851752	c1	0.000511264	c1	0.0380613	c2	0.0328564	c2	-0.055196	c21	-0.071225	c21	-0.0183051	c22	0.0125652	c22	0.111145	c32	0.0471256	c32	-0.181349	c31	-0.14689	c31	0	1	0	0	0	0	0	0	0	0
UBE2L3	0.0547744	c1	0.00761681	c1	-0.00300351	c2	0.0262583	c2	-0.000989427	c21	-0.00902057	c21	-0.0329521	c22	-0.0134317	c22	0.115233	c32	0.0903193	c32	-0.101171	c31	-0.0901347	c31	0	1	0	0	0	0	0	0	0	0
UBE2Q2	0.0867202	c1	0.0176086	c1	-0.0361433	c2	-0.0301007	c2	-0.0414472	c21	-0.0454081	c21	-0.0191339	c22	-0.0181373	c22	-0.00300102	c32	-0.0112784	c32	0.0681568	c31	0.0345022	c31	0	1	0	0	0	0	0	0	0	0
UBE2V1	-0.099294	c1	-0.12346	c1	0.1623	c2	0.174867	c2	0.0979324	c21	0.0292801	c21	-0.226862	c22	-0.199339	c22	0.243967	c32	0.231675	c32	-0.159372	c31	-0.0962654	c31	0	1	2	0	-22	0	32	1	0	1	.2.0.-22.0.32
UGCG	0.0296306	c1	-0.00367567	c1	0.0268921	c2	0.0350856	c2	-0.0129661	c21	0.0133931	c21	-0.0323442	c22	-0.0108065	c22	0.0627498	c32	0.0202642	c32	-0.0796879	c31	-0.0983972	c31	1	1	0	0	0	0	0	0	0	0
UGP2	0.0435222	c1	0.0113543	c1	-0.0803599	c2	-0.0631328	c2	-0.0974893	c21	-0.0915814	c21	-0.0300224	c22	0.00821689	c22	-0.0239582	c32	-0.070868	c32	-0.0609517	c31	-0.0146592	c31	0	1	0	0	0	0	0	0	0	0
UPF2	0.145874	c1	0.0990947	c1	-0.00630175	c2	0.00681979	c2	-0.124865	c21	-0.126354	c21	-0.0842329	c22	-0.0812139	c22	0.0419027	c32	0.0174014	c32	0.0636909	c31	-0.0157645	c31	0	2	0	0	0	0	0	0	0	0
UPF2	0.00127729	c1	-0.00324479	c1	-0.0140402	c2	-0.00190462	c2	-0.0683217	c21	-0.097435	c21	-0.0412271	c22	0.0403039	c22	0.0451107	c32	-0.0365549	c32	-0.0921737	c31	0.0297826	c31	0	0	0	0	0	0	0		0	0
UPK2	0.0870922	c1	0.0354247	c1	-0.064629	c2	-0.031594	c2	-0.159672	c21	0.0252338	c21	0.0490486	c22	0.0493132	c22	-0.0888004	c32	-0.0833188	c32	0.0533334	c31	-0.0321433	c31	1	1	0	0	0	0	0	0	0	0
UQCRB	0.0756022	c1	0.027159	c1	-0.00255619	c2	0.0174196	c2	-0.143982	c21	-0.114513	c21	-0.053599	c22	-0.0300792	c22	0.0368773	c32	0.0185929	c32	0.0851248	c31	0.0335173	c31	0	1	0	0	0	0	0	0	0	0
UQCRFS1	0.00879339	c1	-0.0448778	c1	-0.0201704	c2	0.0158613	c2	-0.14305	c21	-0.129399	c21	0.0498473	c22	0.0571433	c22	-0.00804443	c32	-0.0330028	c32	-0.0404554	c31	-0.0344194	c31	0	1	0	0	0	0	0	0	0	0
USP10	-0.0493575	c1	-0.0582333	c1	-0.0228262	c2	-0.0182218	c2	-0.208647	c21	-0.195328	c21	-0.0260929	c22	-0.0160588	c22	0.0464383	c32	0.00445667	c32	0.109976	c31	0.107267	c31	0	1	0	-21	0	0	0	1	1	1	.0.-21.0.0.0
USP14	-0.0629555	c1	-0.0791319	c1	0.0147263	c2	0.00109024	c2	-0.0703076	c21	-0.0169213	c21	0.0365073	c22	0.03385	c22	0.0323056	c32	0.0208744	c32	0.100624	c31	0.0537318	c31	0	1	0	0	0	0	0	0	0	0
UTRN	0.163878	c1	0.082586	c1	-0.0870827	c2	-0.072281	c2	0.0554162	c21	0.00262505	c21	-0.0359094	c22	-0.0028515	c22	-0.030237	c32	-0.0572336	c32	0.0281244	c31	0.00633987	c31	0	0	0	0	0	0	0		0	0
VAPA	-0.0134439	c1	0.0589969	c1	-0.00994454	c2	0.0122968	c2	0.0576463	c21	0.00533907	c21	0.164187	c22	0.096515	c22	-0.219459	c32	-0.169129	c32	-0.148087	c31	-0.077675	c31	0	1	0	0	0	0	-32	1	0	1	.0.0.0.0.-32
VASP	0.0568255	c1	0.0561748	c1	-0.0644838	c2	-0.0281903	c2	-0.0259741	c21	-0.0457895	c21	-0.0198673	c22	-0.0248902	c22	-0.0175021	c32	-0.00842966	c32	-0.0463941	c31	-0.049143	c31	0	1	0	0	0	0	0	0	0	0
VBP1	-0.0582332	c1	-0.0717891	c1	-0.0194416	c2	-0.0487863	c2	0.0146698	c21	0.123405	c21	0.0340848	c22	0.160419	c22	-0.101741	c32	-0.189082	c32	-0.157381	c31	-0.271768	c31	1	1	0	0	0	-31	0	1	1	1	.0.0.0.-31.0
VCL	0.0231088	c1	0.0439024	c1	-0.024874	c2	-0.0132804	c2	0.0240587	c21	0.00253059	c21	-0.00173117	c22	-0.00760351	c22	-0.00713398	c32	0.00287049	c32	0.0298011	c31	0.014593	c31	0	1	0	0	0	0	0	0	0	0
VIL2	0.100801	c1	0.0743765	c1	-0.291456	c2	-0.250942	c2	-0.0749637	c21	-0.0845152	c21	0.0831629	c22	0.0979469	c22	-0.240072	c32	-0.178786	c32	0.0721594	c31	0.0386517	c31	0	1	-2	0	0	0	-32	1	0	1	.-2.0.0.0.-32
VMD2L3	-0.0274081	c1	-0.0358301	c1	-0.0239299	c2	-0.0247777	c2	0.0138954	c21	0.00324117	c21	0.0216199	c22	-0.0317836	c22	-0.0169942	c32	0.0167024	c32	-0.0642793	c31	-0.0594455	c31	0	1	0	0	0	0	0	0	0	0
vPS26A	0.155015	c1	0.0621573	c1	-0.0866783	c2	-0.0622228	c2	-0.114027	c21	-0.076341	c21	-0.0134196	c22	0.00670275	c22	0.00777393	c32	0.0120641	c32	0.0965192	c31	0.0560794	c31	0	2	0	0	0	0	0	0	0	0
VPS26A	-0.017235	c1	-0.00626587	c1	0.0090836	c2	0.0214976	c2	-0.0112217	c21	0.00174195	c21	-0.00743078	c22	-4.01192e-06	c22	0.0637939	c32	0.0221293	c32	-0.118938	c31	-0.0738042	c31	0	2	0	0	0	0	0	0	0	0
VPS29	-0.270212	c1	-0.176705	c1	-0.001818	c2	0.0340225	c2	0.174576	c21	0.0636081	c21	-0.00148412	c22	-0.00708396	c22	0.0330055	c32	0.0311487	c32	-0.300363	c31	-0.262596	c31	0	1	-1	0	0	-31	0	1	1	1	.-1.0.0.-31.0
VPS4B	0.00318284	c1	-0.0322293	c1	-0.0504227	c2	0.0093645	c2	-0.0414981	c21	-0.0480016	c21	-0.0820915	c22	-0.0393677	c22	0.0202654	c32	-0.000474754	c32	-0.0555107	c31	-0.110016	c31	0	1	0	0	0	0	0	0	0	0
WASF2	0.0381528	c1	0.0176643	c1	-0.0247602	c2	-0.0194776	c2	-0.175074	c21	-0.165628	c21	-0.066499	c22	-0.0672432	c22	-0.0185935	c32	-0.104464	c32	-0.00198068	c31	-0.0609213	c31	0	1	0	-21	0	0	0	1	1	1	.0.-21.0.0.0
WBSCR1	-0.055155	c1	-0.033343	c1	0.0202247	c2	0.0202938	c2	0.0202437	c21	0.0302071	c21	0.00867234	c22	0.0144817	c22	-0.032904	c32	-0.0268442	c32	-0.0612388	c31	-0.0526634	c31	0	1	0	0	0	0	0	0	0	0
WDR1	0.0306334	c1	0.0104936	c1	0.00559763	c2	0.0119901	c2	0.0332796	c21	0.0336322	c21	-0.0210084	c22	-0.00719091	c22	0.0594427	c32	0.0216843	c32	-0.0932762	c31	-0.0974048	c31	1	1	0	0	0	0	0	0	0	0
WDR43	0.02382	c1	0.0315382	c1	-0.00435086	c2	0.0112159	c2	-0.0317034	c21	0.0200911	c21	0.115036	c22	0.0834263	c22	0.0207649	c32	-0.0190055	c32	-0.0338942	c31	-0.0362144	c31	0	1	0	0	0	0	0	0	0	0
WDR66	0.27495	c1	0.182696	c1	-0.134499	c2	-0.11905	c2	0.130037	c21	0.0632804	c21	-0.0185457	c22	0.0164712	c22	-0.0137259	c32	-0.0439435	c32	-0.0714644	c31	-0.0223177	c31	0	1	1	0	0	0	0	0	0	1	.1.0.0.0.0
WZ10	0.02931	c1	-0.0041638	c1	-0.0484416	c2	-0.0386699	c2	-0.0561455	c21	-0.0581483	c21	-0.0404945	c22	-0.0260289	c22	0.0387194	c32	0.0156465	c32	-0.00812486	c31	-0.0157165	c31	0	0	0	0	0	0	0		0	0
XAGE1	0.079901	c1	0.0656791	c1	-0.0161896	c2	0.00564978	c2	-0.11653	c21	-0.0779592	c21	0.0085057	c22	0.0229162	c22	0.0128498	c32	-0.00802347	c32	0.012751	c31	-0.0127925	c31	0	1	0	0	0	0	0	0	0	0
XRCC6	0.00475099	c1	-0.0227365	c1	0.0202806	c2	0.0323773	c2	-0.0758096	c21	-0.0189172	c21	0.0339416	c22	0.0532923	c22	-0.0157484	c32	-0.0668871	c32	0.00372145	c31	-0.0829934	c31	1	1	0	0	0	0	0	0	0	0
XTP6	0.0220674	c1	-0.0386244	c1	-0.0428281	c2	-0.0337926	c2	-0.0210526	c21	-0.000326707	c21	-0.0496868	c22	-0.0228114	c22	-0.0248375	c32	-0.0290293	c32	0.048703	c31	0.018622	c31	0	0	0	0	0	0	0		0	0
YAF2	-0.0348467	c1	-0.0378853	c1	-0.040498	c2	-0.0363103	c2	-0.141016	c21	-0.0780927	c21	-0.0286544	c22	-0.0117367	c22	0.00756721	c32	-0.0226216	c32	0.0194259	c31	0.00165951	c31	1	1	0	0	0	0	0	0	0	0
YAP1	0.150286	c1	0.0607532	c1	-0.0611047	c2	-0.0631775	c2	-0.182029	c21	-0.167268	c21	-0.171539	c22	-0.131631	c22	0.0798174	c32	0.0390495	c32	0.110548	c31	0.0782488	c31	0	1	0	-21	0	0	0	1	1	1	.0.-21.0.0.0
YBX1	0.0575929	c1	0.0281891	c1	-0.0238454	c2	0.00362327	c2	-0.0621013	c21	-0.0501062	c21	0.058821	c22	0.0421554	c22	-0.0482447	c32	-0.0456343	c32	0.0357345	c31	0.0303344	c31	0	1	0	0	0	0	0	0	0	0
YT521	0.0875388	c1	0.0549387	c1	-0.125861	c2	-0.0803803	c2	0.073274	c21	0.0477858	c21	-0.0812987	c22	-0.0237767	c22	0.0604343	c32	0.0111959	c32	-0.156038	c31	-0.128177	c31	0	1	0	0	0	0	0	0	0	0
YWHAE	0.0258788	c1	0.0734264	c1	0.0313873	c2	0.012701	c2	-0.126807	c21	-0.108117	c21	-0.021465	c22	0.0455639	c22	-0.0374913	c32	-0.197565	c32	0.0157539	c31	0.0822744	c31	0	2	0	0	0	0	0	0	0	0
YWHAE	0.14067	c1	0.101559	c1	-0.0581996	c2	-0.0486634	c2	-0.0760039	c21	-0.0249083	c21	0.0817094	c22	0.0723057	c22	-0.0446388	c32	-0.0340201	c32	-0.000304212	c31	-0.0307964	c31	0	0	0	0	0	0	0		0	0
YWHAG	-0.0433044	c1	-0.0514059	c1	-0.0553803	c2	-0.0322779	c2	0.018767	c21	0.0518975	c21	0.00596672	c22	0.00918983	c22	-0.0162413	c32	-0.0170278	c32	-0.0430649	c31	-0.0805154	c31	0	0	0	0	0	0	0		0	0
YY1	0.0536345	c1	-0.0259491	c1	-0.081253	c2	-0.0741637	c2	-0.0237475	c21	0.0288721	c21	-0.106503	c22	-0.059212	c22	-0.00349504	c32	-0.0599831	c32	-0.0665904	c31	-0.13859	c31	0	1	0	0	0	0	0	0	0	0
ZCD1	0.0836435	c1	0.0295749	c1	-0.0501664	c2	-0.00478432	c2	-0.192672	c21	-0.051323	c21	0.047464	c22	0.0316539	c22	-0.0731414	c32	-0.0771992	c32	0.10483	c31	0.00952264	c31	0	1	0	0	0	0	0	0	0	0
ZFAND2A	-0.00175035	c1	-0.0330233	c1	-0.00720468	c2	0.00190523	c2	-0.135724	c21	-0.0791046	c21	0.133396	c22	0.126032	c22	-0.0809803	c32	-0.113879	c32	0.0610044	c31	0.00602828	c31	0	1	0	0	0	0	0	0	0	0
ZFR	0.107148	c1	0.150284	c1	-0.0425761	c2	0.0533612	c2	0.129766	c21	0.27152	c21	0.0451814	c22	0.142575	c22	-0.115132	c32	-0.215226	c32	-0.201529	c31	-0.380037	c31	0	1	0	0	0	-31	0	1	1	1	.0.0.0.-31.0
ZFYVE21	0.0465102	c1	0.0148447	c1	-0.00348161	c2	-0.00356884	c2	-0.151124	c21	-0.124134	c21	-0.0857351	c22	-0.065101	c22	0.0434196	c32	-0.022083	c32	0.0374231	c31	-0.0600338	c31	0	1	0	0	0	0	0	0	0	0
ZNF320	0.0964046	c1	0.0674224	c1	-0.102357	c2	-0.101646	c2	-0.226965	c21	-0.0861597	c21	0.19299	c22	0.104909	c22	-0.0503018	c32	-0.0878245	c32	0.0313392	c31	0.00127099	c31	0	0	0	0	0	0	0		0	0
